# Supplementary material for: Bitacora: A Toolkit for Supporting NonProfits to Critically Reflect on Social Media Data Use
Source: Atypon-hosted journal article supplement (doi:10.1145/3613904.3642673), 2024-05-11
Supplement: pn7657-supplemental-material-2.pdf [file pn7657-supplemental-material-2.pdf]

Manual  
**bitácora** Toolkit

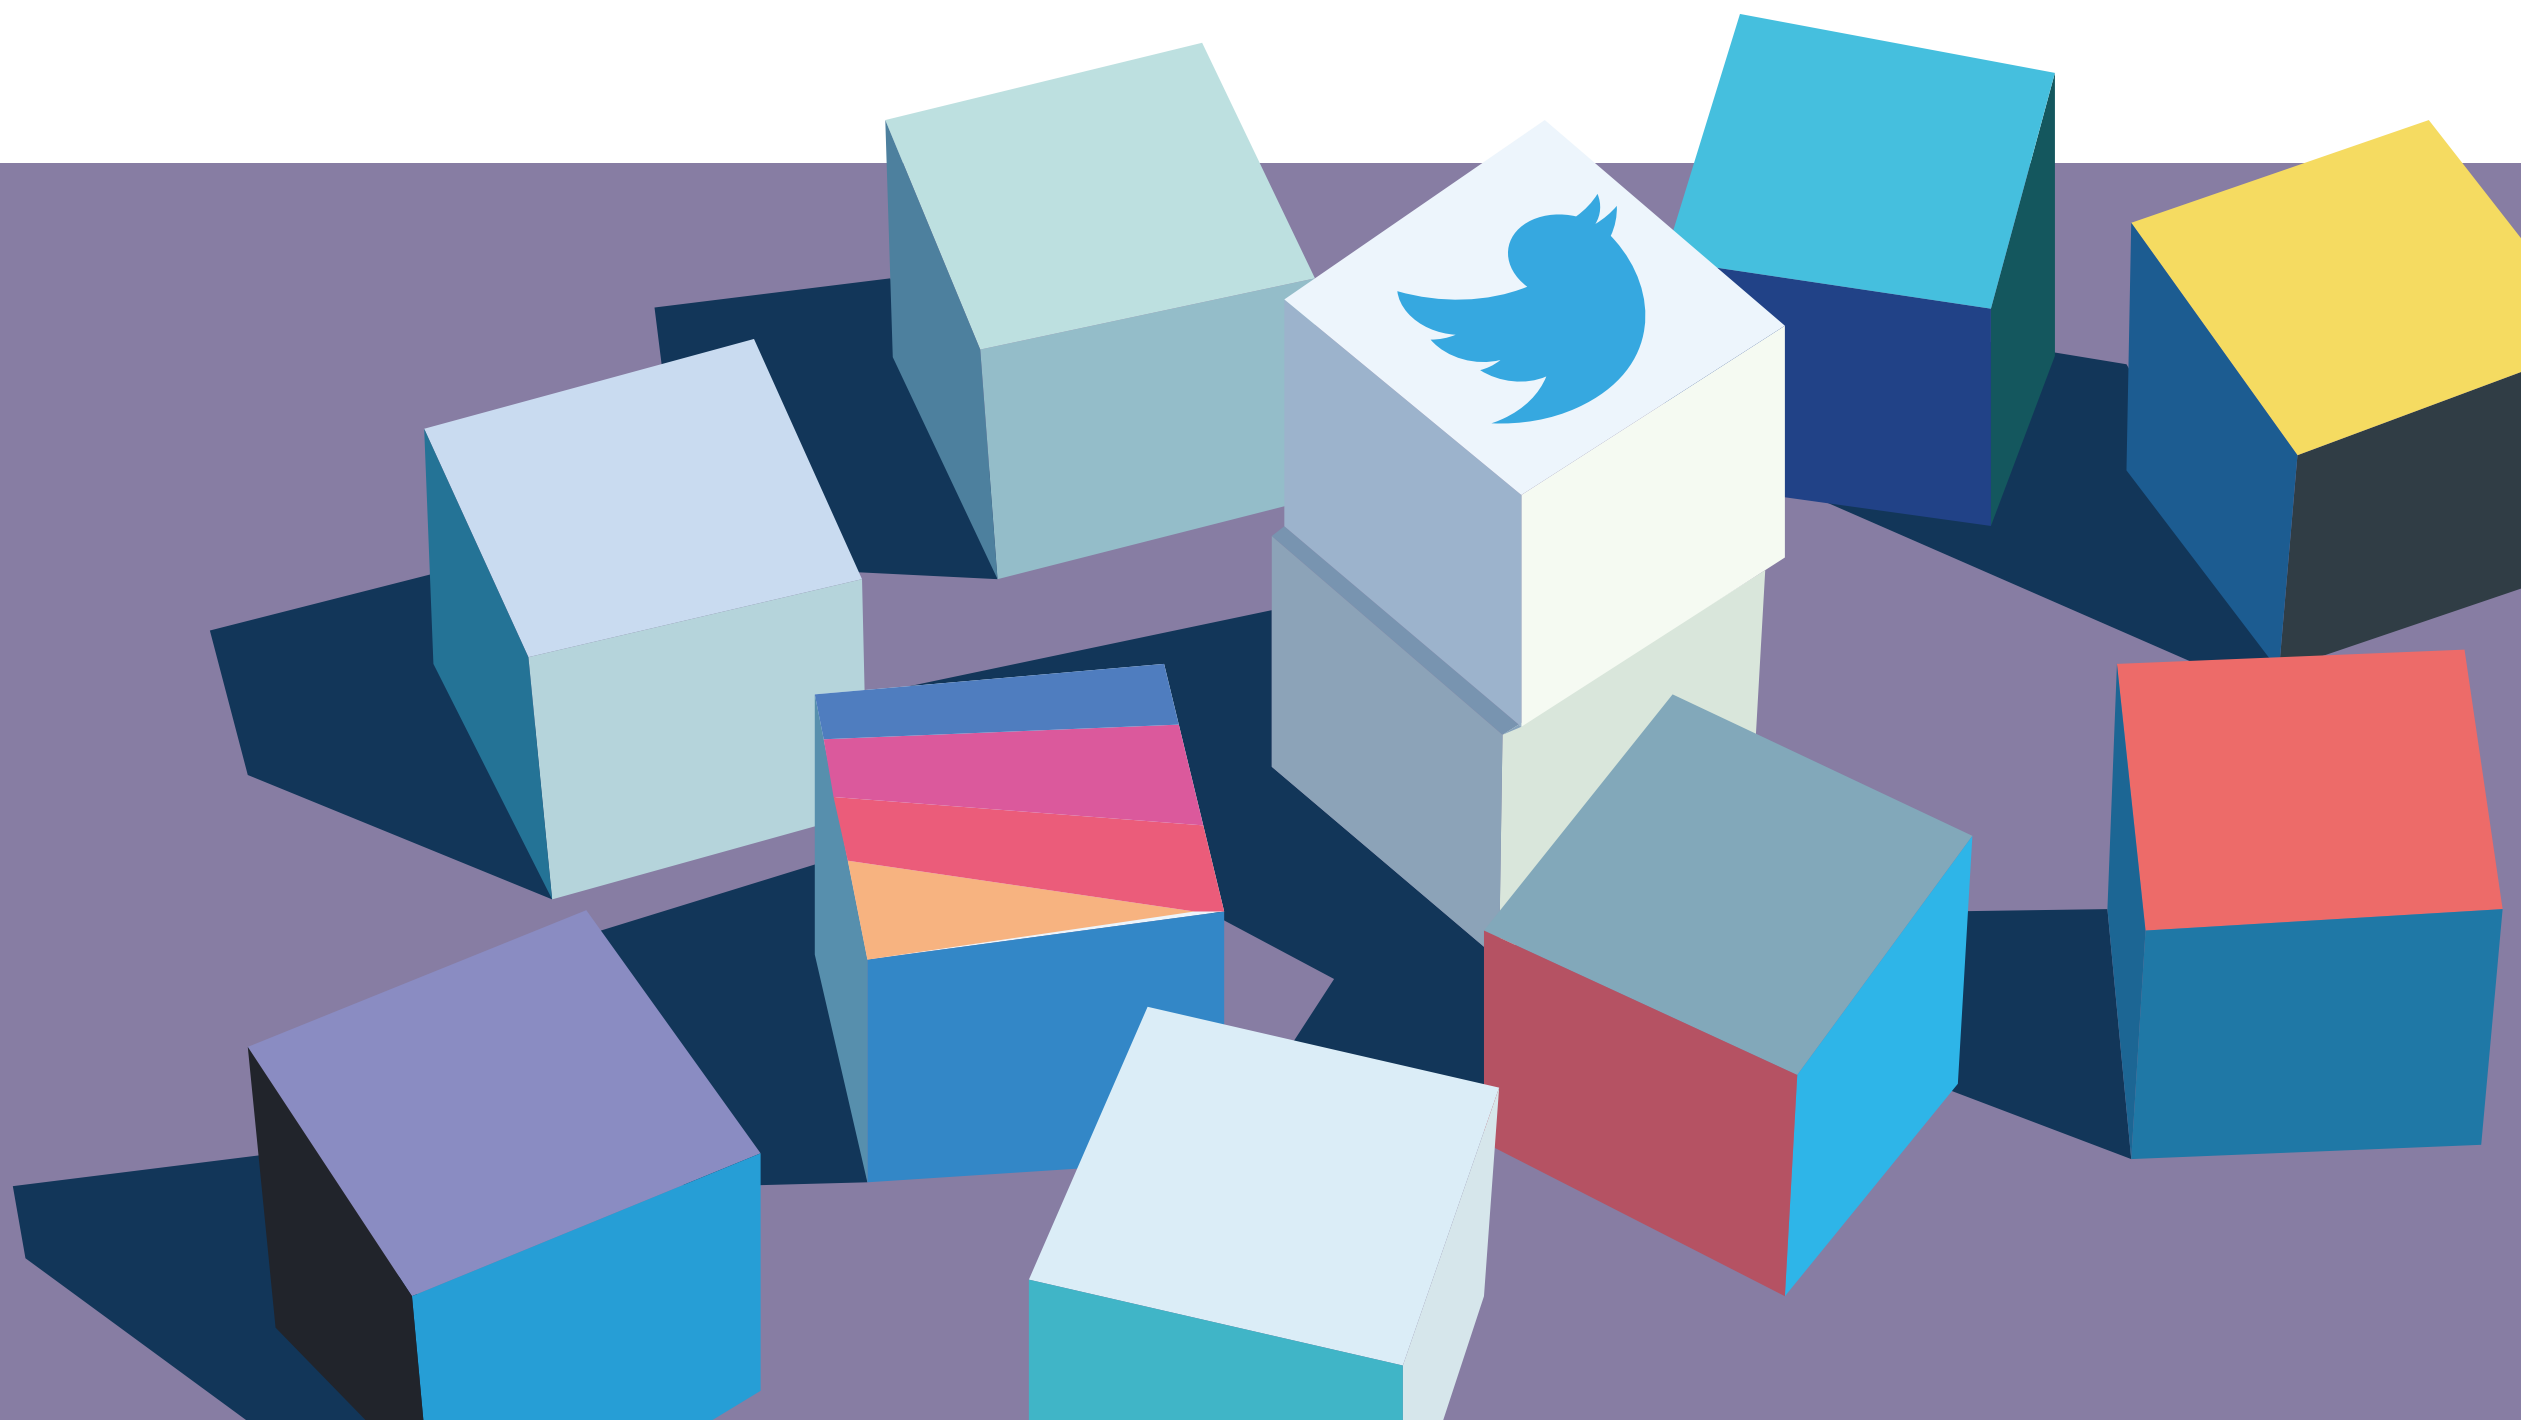

# Semblanza

**Adriana Alvarado Garcia** es doctora en **Computación Centrada en el Humano** (Georgia Tech). Su investigación doctoral se ha enfocado en examinar las motivaciones de las comunidades para utilizar las plataformas de redes sociales como un medio de organización y las implicaciones de conectar los datos y experiencias recolectadas en las plataformas con instituciones que podrían aprovecharlas como insumos para informar su trabajo con comunidades.

En el 2019 fue nombrada Data Fellow del primer programa organizado por la Organización de las Naciones Unidas en colaboración con Global Pulse. A partir de enero del 2020 colaboró con el Laboratorio de Aceleración de la Ciudad de México que forma parte del Programa de las Naciones Unidas para el Desarrollo (PNUD).

Estas colaboraciones le permitieron examinar el rol de las prácticas organizativas y la interpretación humana cuando las organizaciones no gubernamentales (ONG) utilizan datos de redes sociales para informar sus intervenciones. Aprovechando las lecciones de estas colaboraciones, Adriana desarrolló el kit de herramientas Bitacora, que tiene por objetivo apoyar a las ONG para que utilicen los rastros digitales como evidencia para descubrir la pluralidad de formas de saber y hacer de las ciudadanas en tiempos de crisis centrándose en las perspectivas de la comunidad y el contexto de la producción de datos.

Datos de contacto

Correo electrónico: [alvaradogarcia.adriana@gmail.com](mailto:alvaradogarcia.adriana@gmail.com)

Twitter: [@ella\\_es\\_adriana](https://twitter.com/ella_es_adriana)

# Créditos

Este kit de herramientas fue diseñado como parte de la investigación doctoral titulada Diseño de tecnologías centradas en el ser humano para migraciones de datos de redes sociales por **Adriana Alvarado García**.

Diagramación por Katy Garfias.

Correo electrónico: [katygarfiasg@gmail.com](mailto:katygarfiasg@gmail.com)

# 01

## INTRODUCCIÓN AL MANUAL

|                                                   |    |
|---------------------------------------------------|----|
| ¿Que es Bitácora?                                 | 05 |
| ¿Cuáles son los componentes de bitácora?          | 05 |
| ¿Para quién está diseñado el kit de herramientas? | 06 |
| ¿Para qué es este kit de herramientas?            | 06 |
| ¿Cómo utilizar este manual?                       | 07 |

# 02

## INTRODUCCIÓN A LAS REDES SOCIALES

|                                                                                      |    |
|--------------------------------------------------------------------------------------|----|
| Entendiendo el potencial de las redes sociales                                       | 09 |
| Casos de estudio                                                                     | 10 |
| ¿Cómo determinar si los datos de Twitter son los adecuados para informar tu trabajo? | 11 |

# 03

## ANÁLISIS

|                                                                |    |
|----------------------------------------------------------------|----|
| Introducción                                                   | 16 |
| Proceso de análisis                                            | 17 |
| Análisis exploratorio                                          | 18 |
| Análisis cualitativo                                           | 24 |
| Recomendaciones generales para el análisis de datos de Twitter | 30 |

# 04

## HERRAMIENTAS

|                              |    |
|------------------------------|----|
| Herramientas computacionales | 34 |
| Módulo 1                     | 36 |
| Módulo 2                     | 38 |
| Herramientas Cualitativas    | 44 |
| Diagrama de afinidad         | 46 |

## PLANTILLAS

47

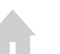

# 01

## INTRODUCCIÓN AL MANUAL

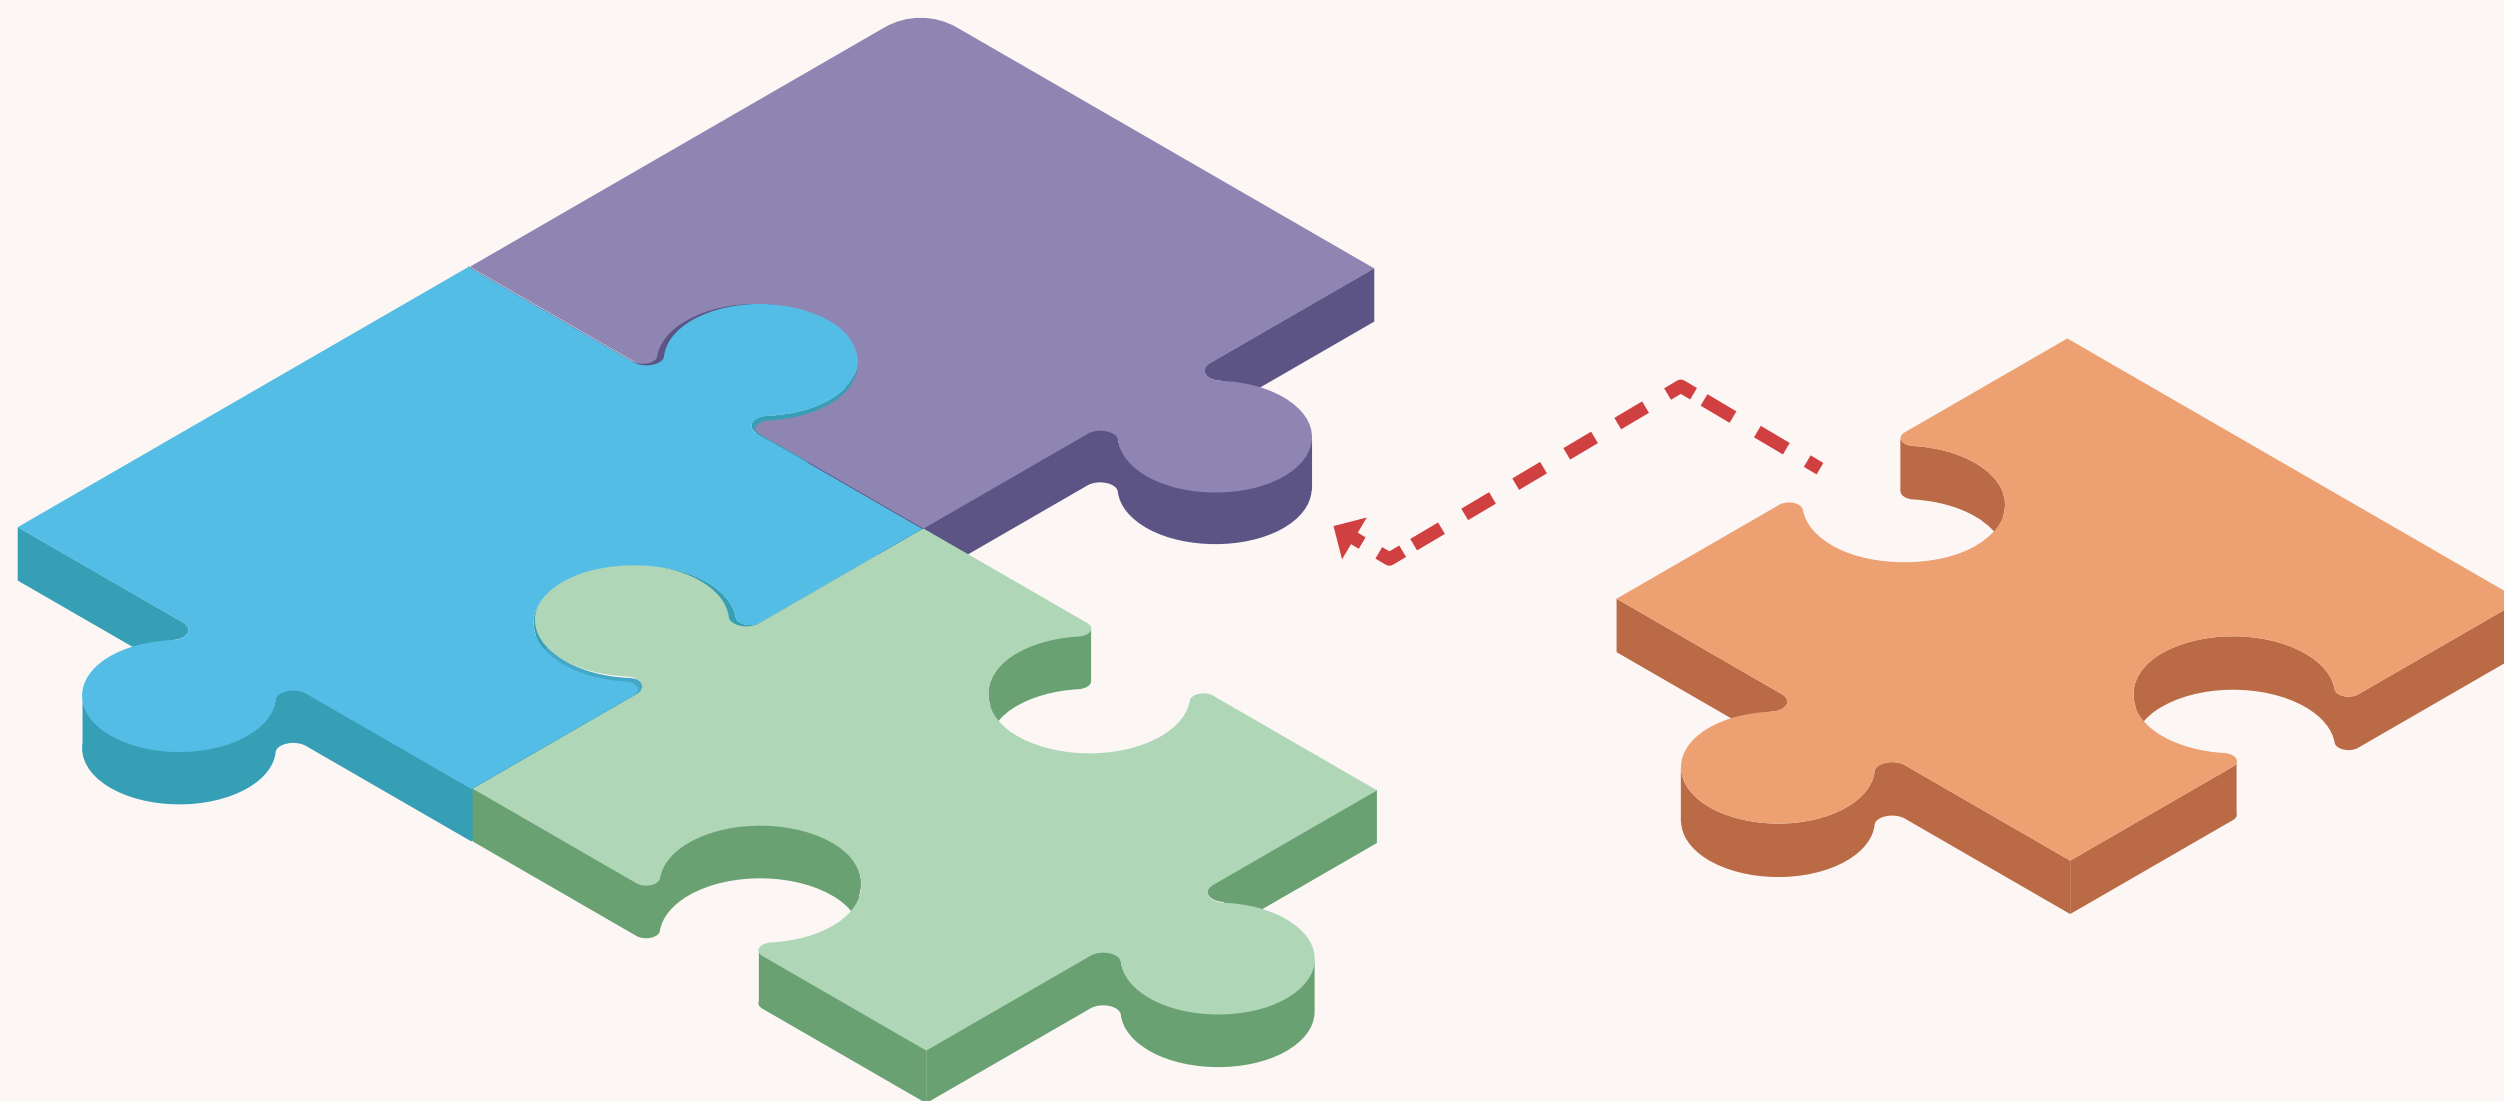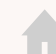



# Introducción a las herramientas

## ¿Que es Bitácora?

Bitácora es un kit de herramientas computacionales y cualitativas que tienen por objetivo facilitar el uso de datos de redes sociales para informar el trabajo de las instituciones gubernamentales, organizaciones civiles y organizaciones no gubernamentales (ONGs).

El propósito del kit es guiar a las lectoras en el proceso de distinguir las perspectivas de la comunidad y el contexto de la producción de datos, al momento de recolectar e interpretar datos de redes sociales, específicamente en Twitter.

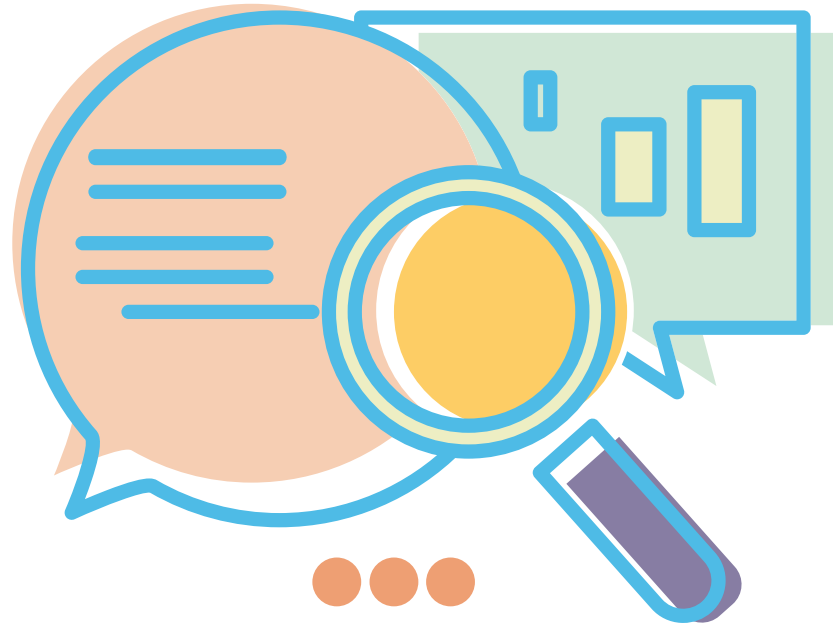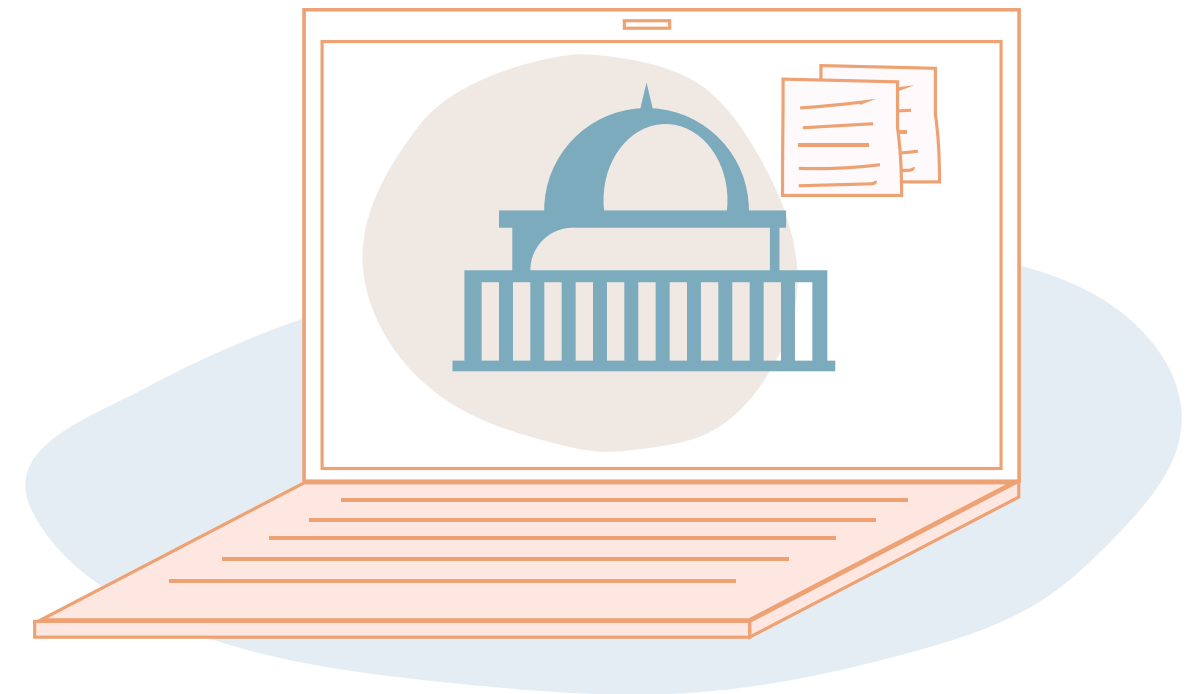

## ¿Cuáles son los componentes de bitácora?

Los componentes del kit son:

1.- Una plataforma que contiene dos herramientas computacionales.

Módulo 1: Herramienta para buscar y descargar tuits.

Módulo 2: Herramienta que permite el análisis de tuits a escala utilizando procesamiento de lenguaje natural. Esta herramienta facilita el filtrado e identificación de tuits con contenido similar al problema que se está examinando.

2.- Este manual que concentra una serie de aprendizajes que guían a los lectores en el proceso de utilizar las herramientas de la plataforma para buscar, recolectar, interpretar e integrar datos de redes sociales como evidencia para informar su trabajo.

## Introducción a las herramientas

### ¿Para quién está diseñado el kit de herramientas?

Creamos este conjunto de herramientas para profesionales que trabajan en organizaciones de la sociedad civil, organizaciones sin fines de lucro e instituciones gubernamentales que estén interesadas en aprovechar el potencial de las redes sociales para identificar capacidades locales, monitorear crisis comunitarias y desarrollar intervenciones basadas en prácticas locales.

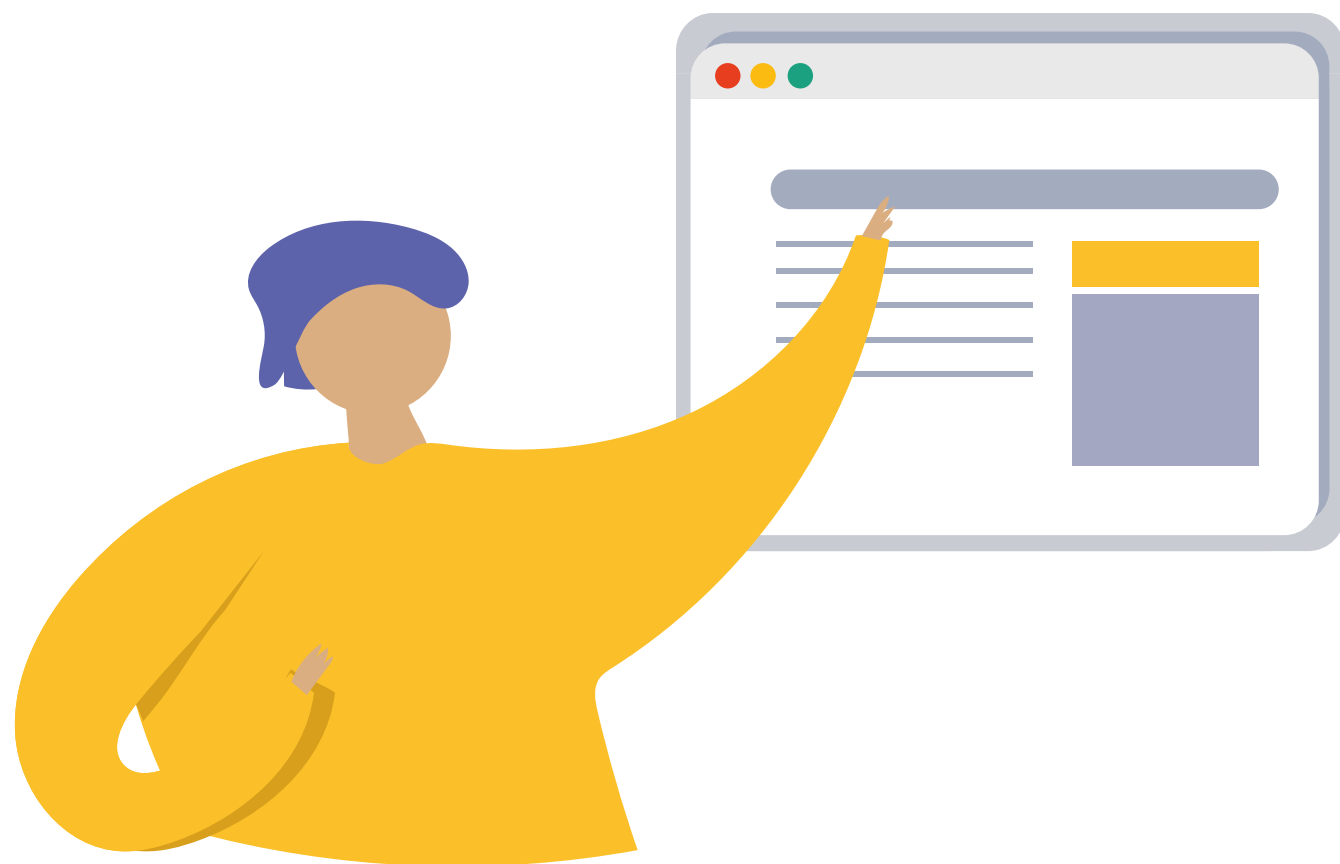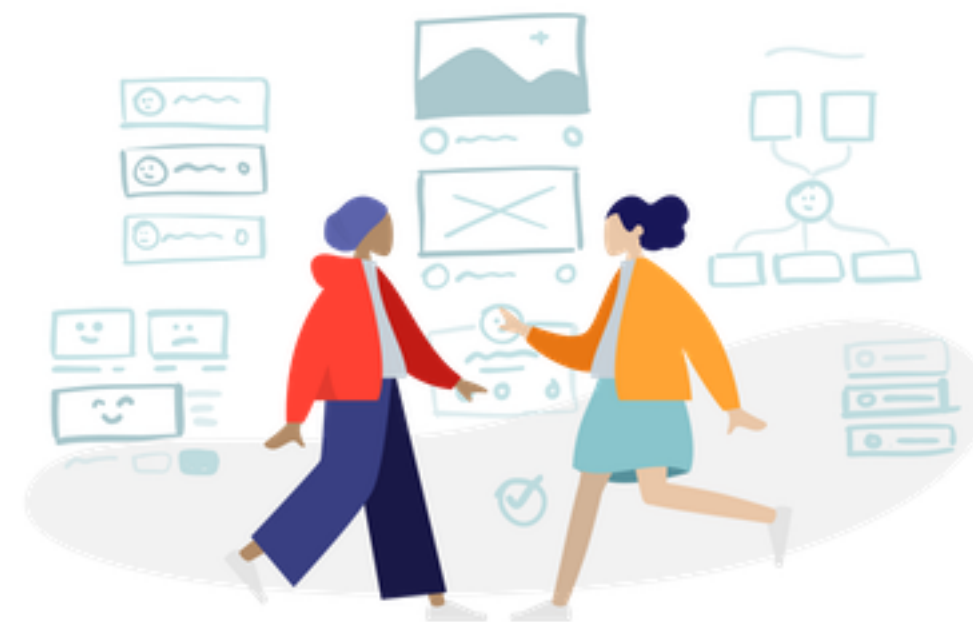

### ¿Para qué es este kit de herramientas?

#### Si trabajas en problemas...

- Que son difíciles de examinar utilizando fuentes de datos tradicionales
- Para los que no existen datos actualizados

#### Si te interesa...

- Entender la respuesta de la comunidad a problemas locales
- Entender las conexiones y relaciones entre individuos que son difíciles de rastrear a través de datos estadísticos
- Entender el discurso sobre un tema específico
- Identificar personas, capacidades, narrativas y modelos locales de organización
- Identificar actores y acciones que no estaban previamente identificados
- Reconocer la riqueza de enfoques y la pluralidad de formas de conocer y hacer de comunidades en tiempos de crisis
- Diferenciar cómo se manifiesta un mismo fenómeno en distintas comunidades

# Introducción a las herramientas

## ¿Cómo utilizar este manual?

El propósito de este manual es brindar una introducción y una guía a las y los lectores tanto del uso de herramientas de bitácora así como de las ventajas y limitaciones que supone el uso de datos provenientes de redes sociales. El manual incluye una serie de recursos que promueven un uso crítico y contextualizado de los datos de Twitter.

El manual esta dividido en cuatro secciones:

01 Introducción al manual

02 Introducción a las redes sociales

03 Análisis

04 Herramientas

Se recomienda leer la sección 1 y 2 del manual antes de interactuar con las herramientas de la plataforma, ya que es necesario tener un entendimiento de lo que es o no posible hacer con los datos de Twitter antes de buscar, descargar y analizar datos.

En el manual se incluyen también varias plantillas de trabajo que se recomiendan utilizar en paralelo con las herramientas computacionales. Sugerimos no solo utilizar las plantillas sino también adaptarlas a las particularidades y necesidades de tu investigación.

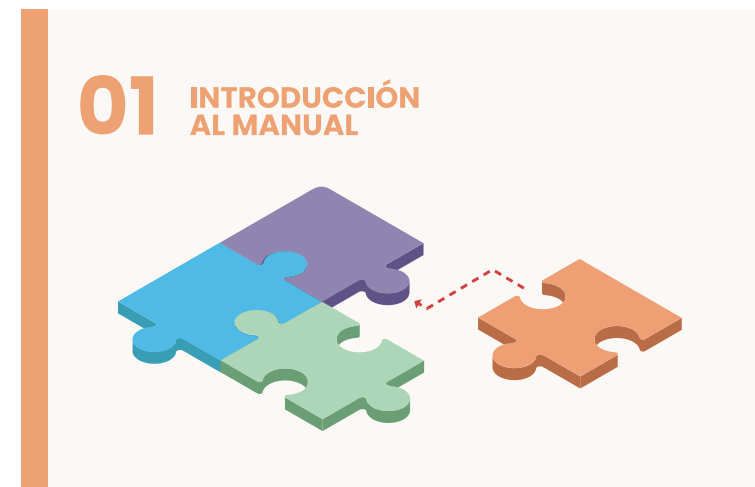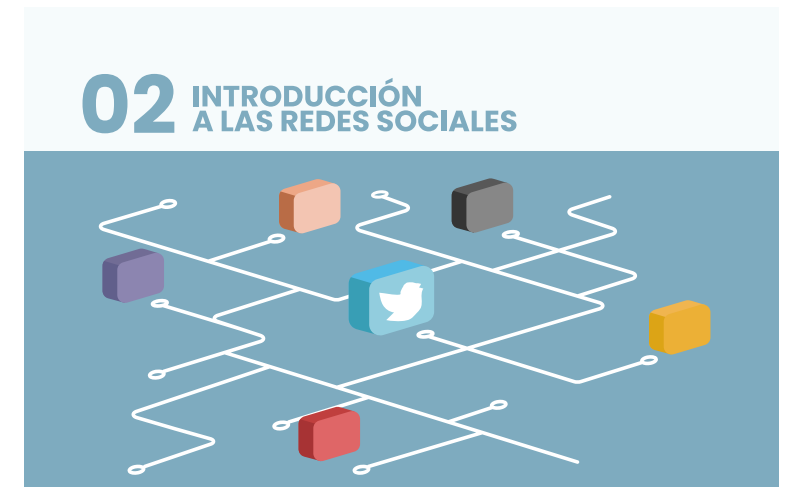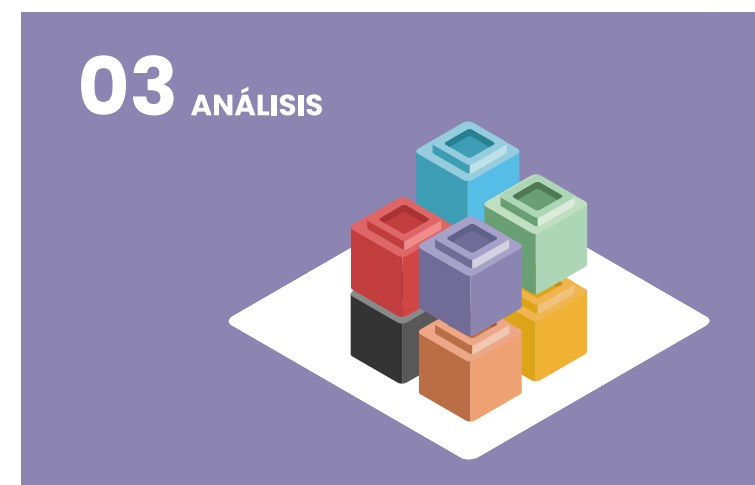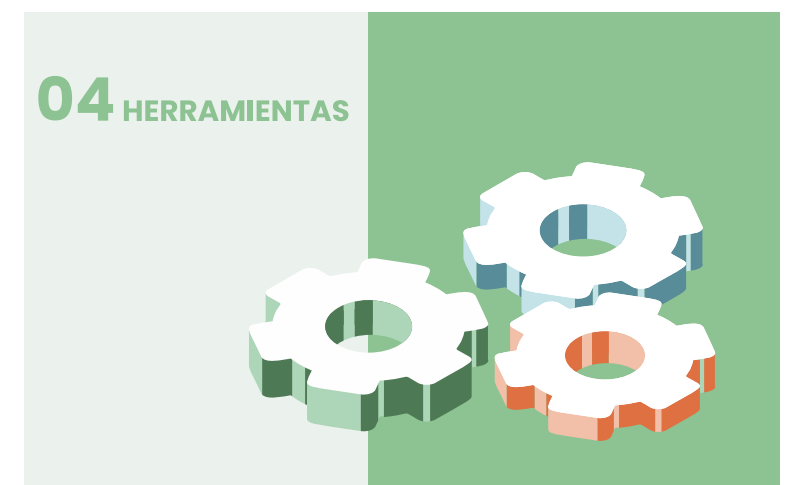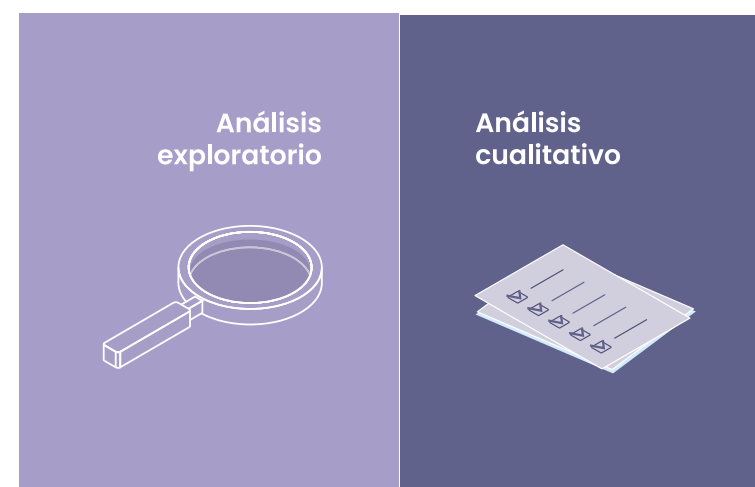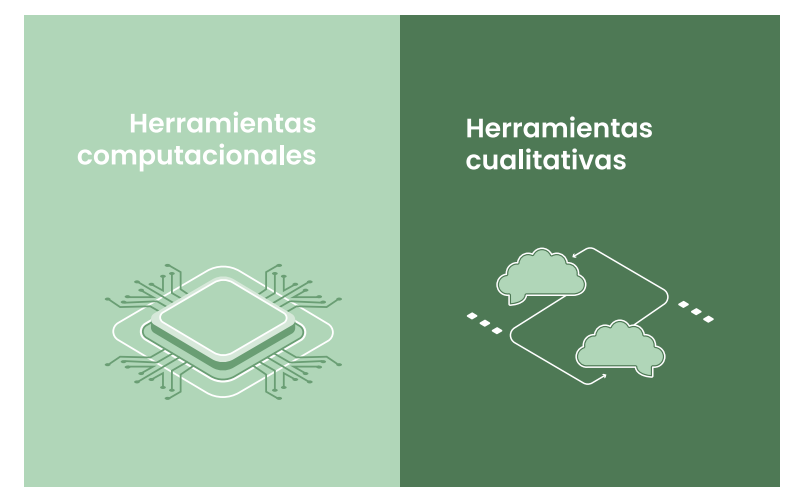

# 02 INTRODUCCIÓN A LAS REDES SOCIALES

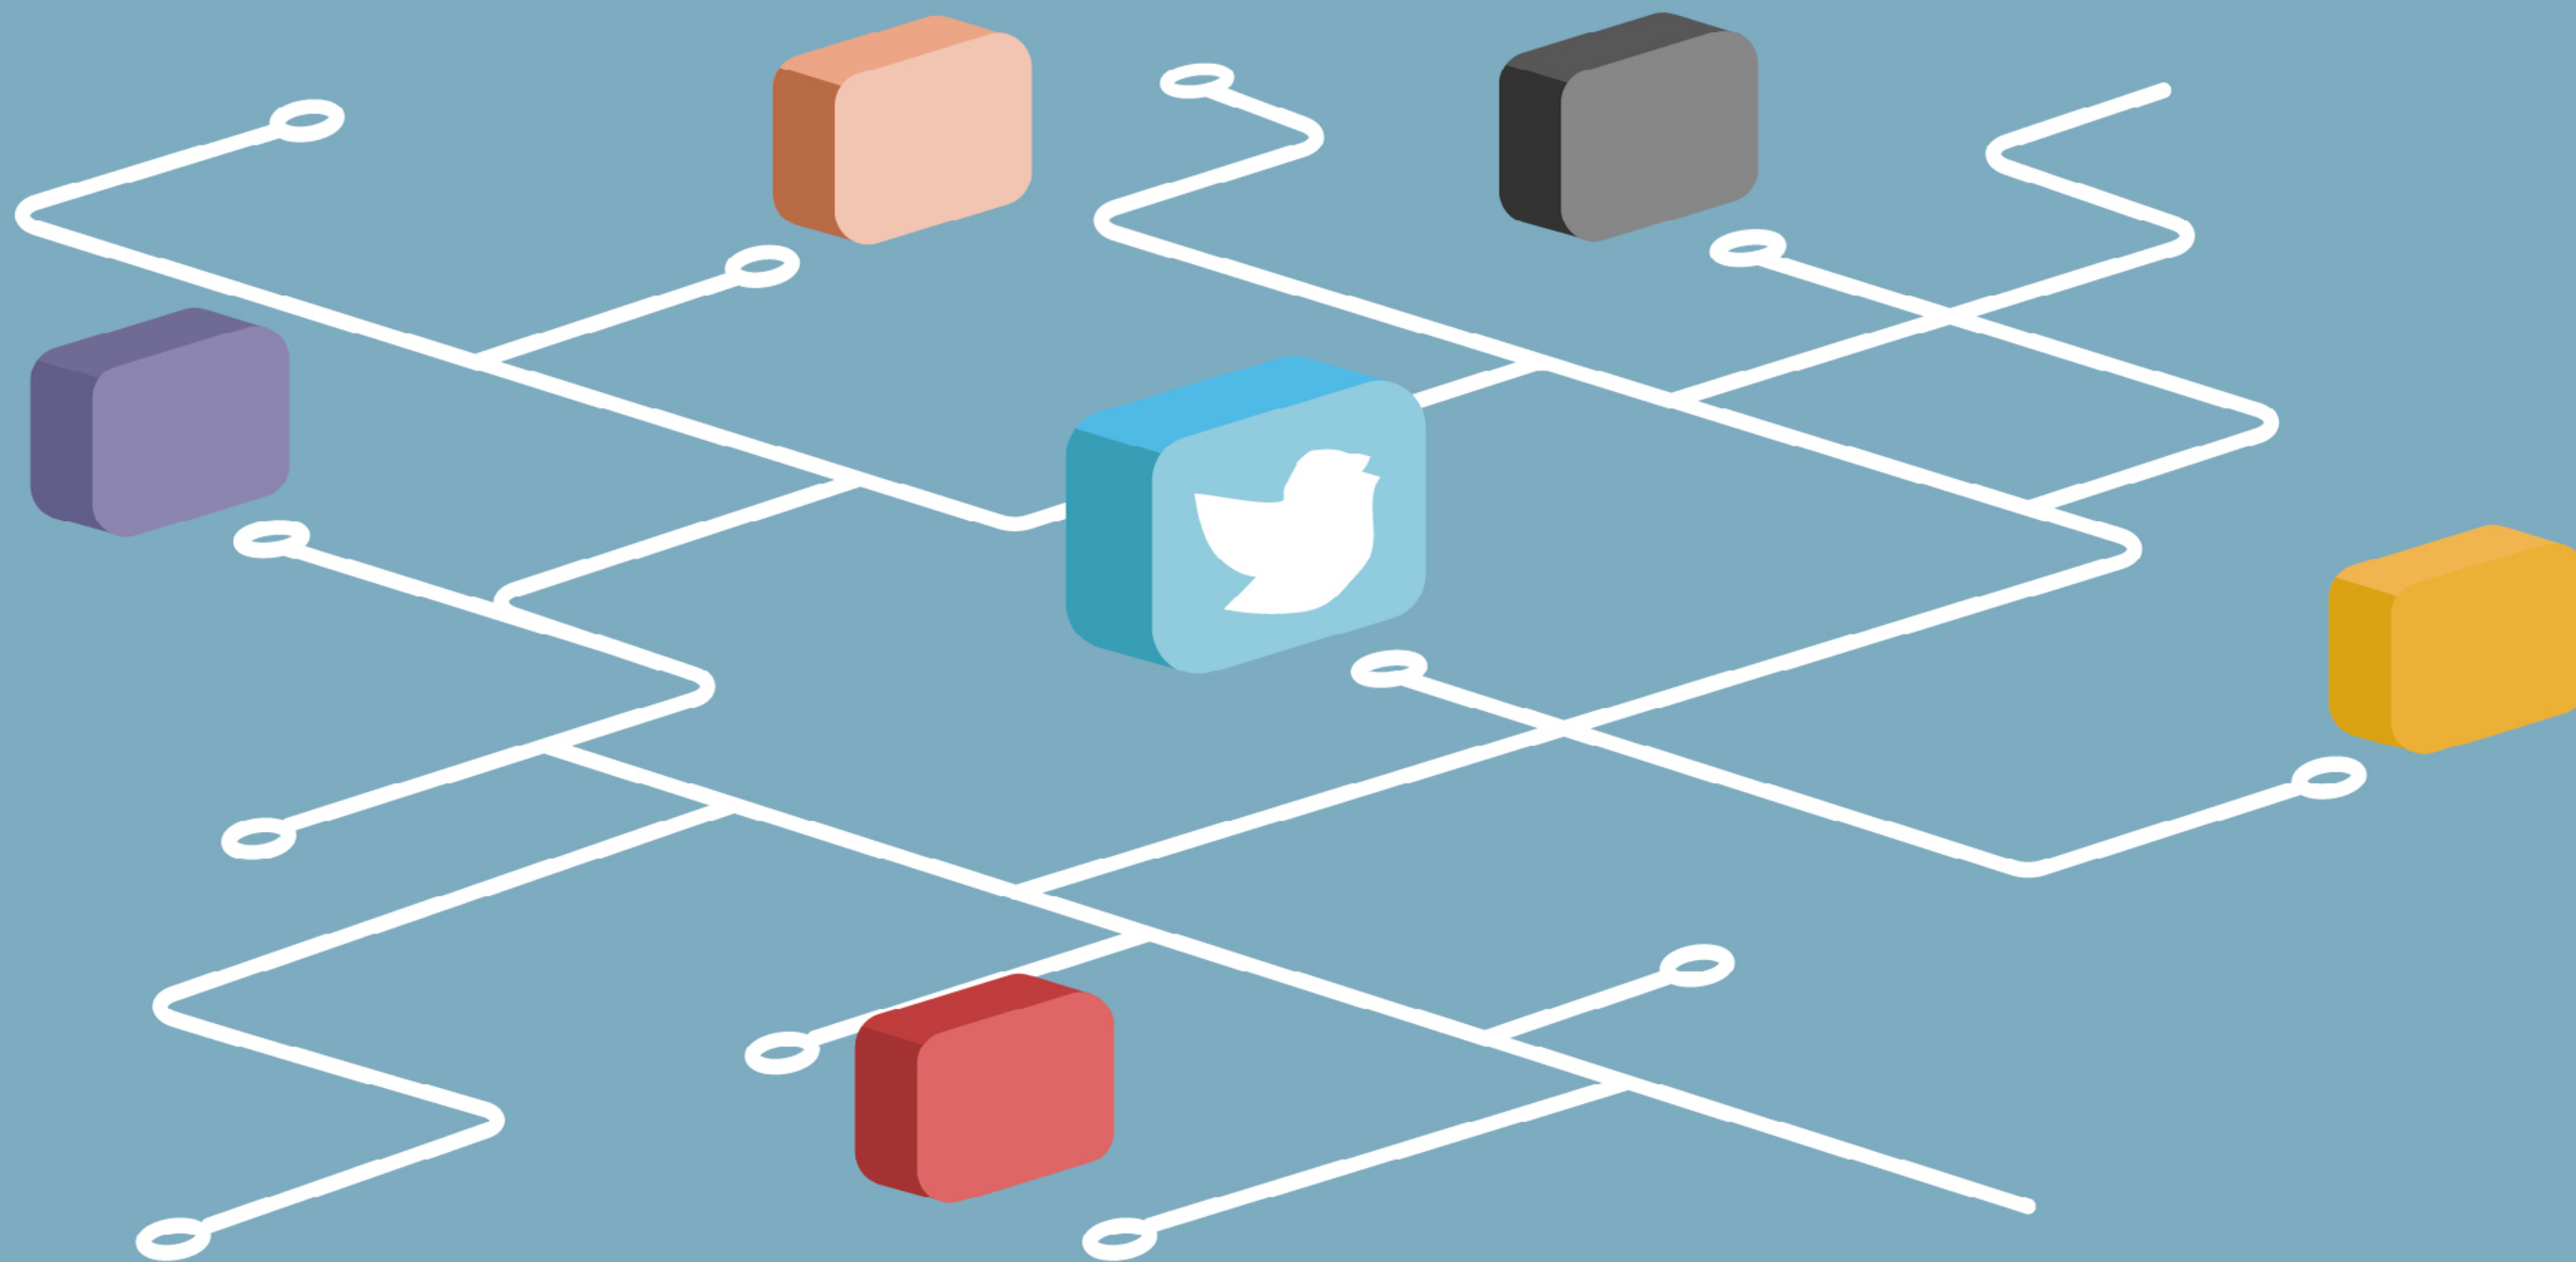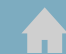

## Entendiendo el potencial de las redes sociales

### ¿Cómo pueden las redes sociales ayudar a informar el trabajo de las instituciones gubernamentales, ONGs y organizaciones civiles?

En los últimos años, las plataformas de redes sociales han demostrado ser una herramienta efectiva que permite a las comunidades desarrollar nuevas formas de organización mediante el intercambio y acumulación de datos. Debido a sus características particulares, el contenido generado en redes sociales se ha convertido en una alternativa para informar las intervenciones de organizaciones no gubernamentales, civiles y de gobierno. Los datos de redes sociales tienen el potencial de informar sobre el contexto de las necesidades y problemáticas de poblaciones, así como sobre las capacidades y la experiencia de los ciudadanos al responder a crisis locales.

En este manual nos enfocamos únicamente en los datos de Twitter, los cuales permiten identificar: personas, activos locales, narrativas, ritmos y modelos de organización que de otra manera son difíciles de encontrar.

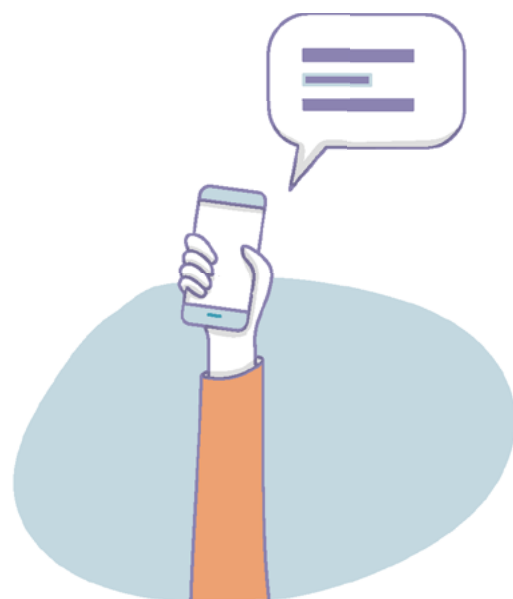

El análisis de los **datos de Twitter** ofrece una riqueza única de enfoques y pluralidad de formas de conocer y hacer de comunidades en tiempos de crisis.



## Entendiendo el potencial de las redes sociales

A continuación describimos algunos proyectos que han utilizado datos de Twitter como principal fuente de información y que ilustran las principales fortalezas de Twitter.

### Caso de estudio:

#### Uso de Twitter para medir la discusión global sobre el cambio climático

**Descripción:** Global Pulse desarrolló un monitor de redes sociales en tiempo real para medir y explorar el discurso en Twitter sobre el cambio climático en apoyo de la Cumbre del Clima de las Naciones Unidas en septiembre de 2014. La medición y visualización de los tweets públicos a lo largo del tiempo creó una línea de base de participación y mostró un aumento significativo en debates sobre el cambio climático durante la Cumbre del Clima.

**Año:** 2014

**Autores:** UN Global Pulse

**Referencia:** UN Global Pulse, 'Using Twitter to Measure Global Engagement on Climate Change', Global Pulse Project Series, no.7, 2015.

**Link:** [https://www.unglobalpulse.org/wp-content/uploads/2014/09/UNGP\\_ProjectSeries\\_Climate\\_Monitor\\_2015\\_0.pdf](https://www.unglobalpulse.org/wp-content/uploads/2014/09/UNGP_ProjectSeries_Climate_Monitor_2015_0.pdf)

**Aprendizaje:** Los datos de Twitter pueden ayudar a medir la conciencia, respaldar la toma de decisiones sobre políticas de distinta índole e impulsar una mayor participación pública.

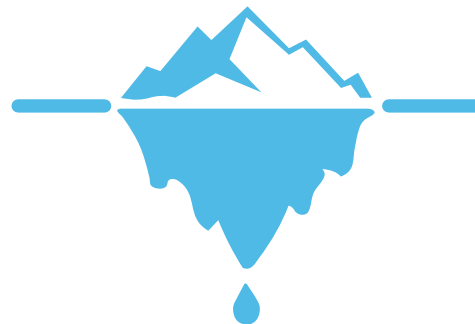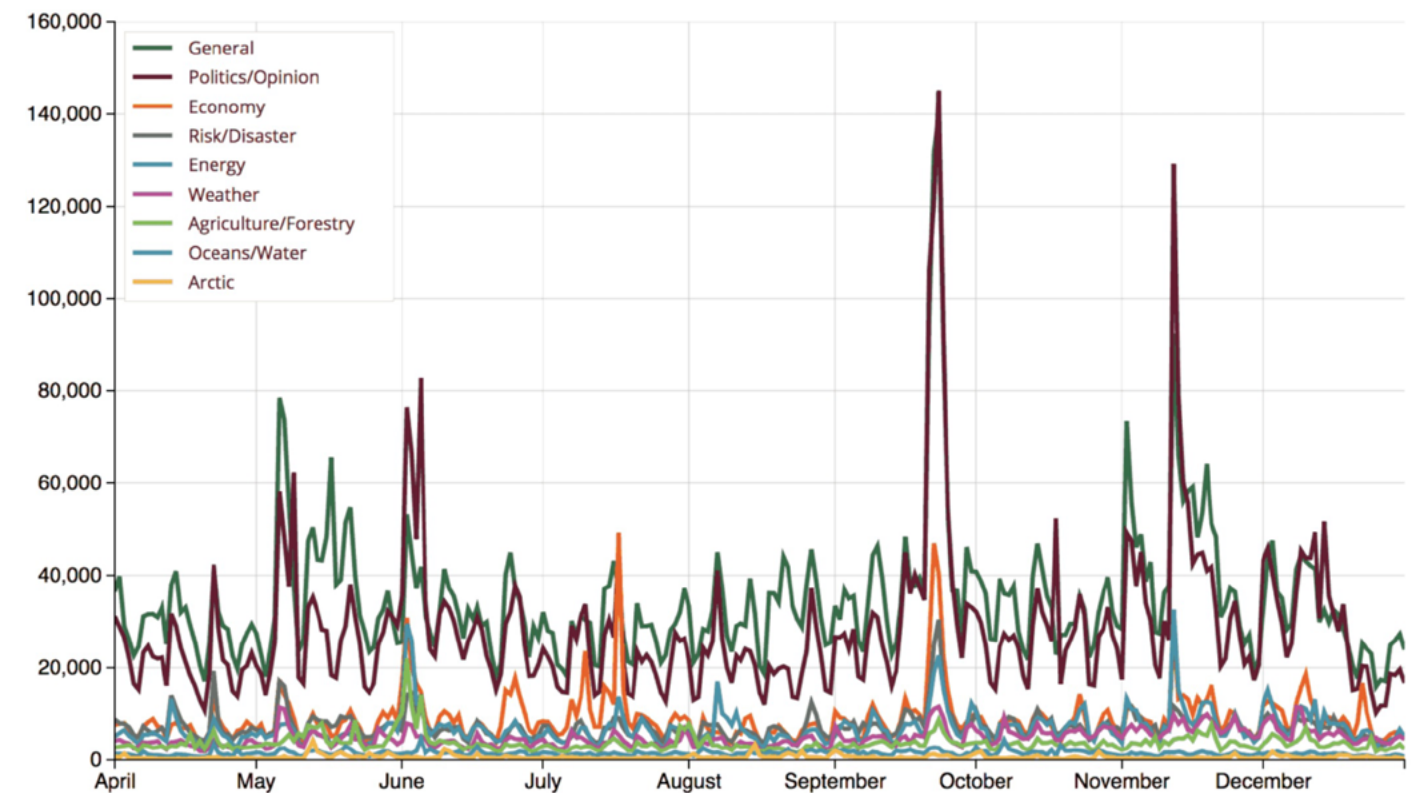

Gráfica de los volúmenes diarios de tweets en inglés sobre el cambio climático y varios subtemas relacionados.

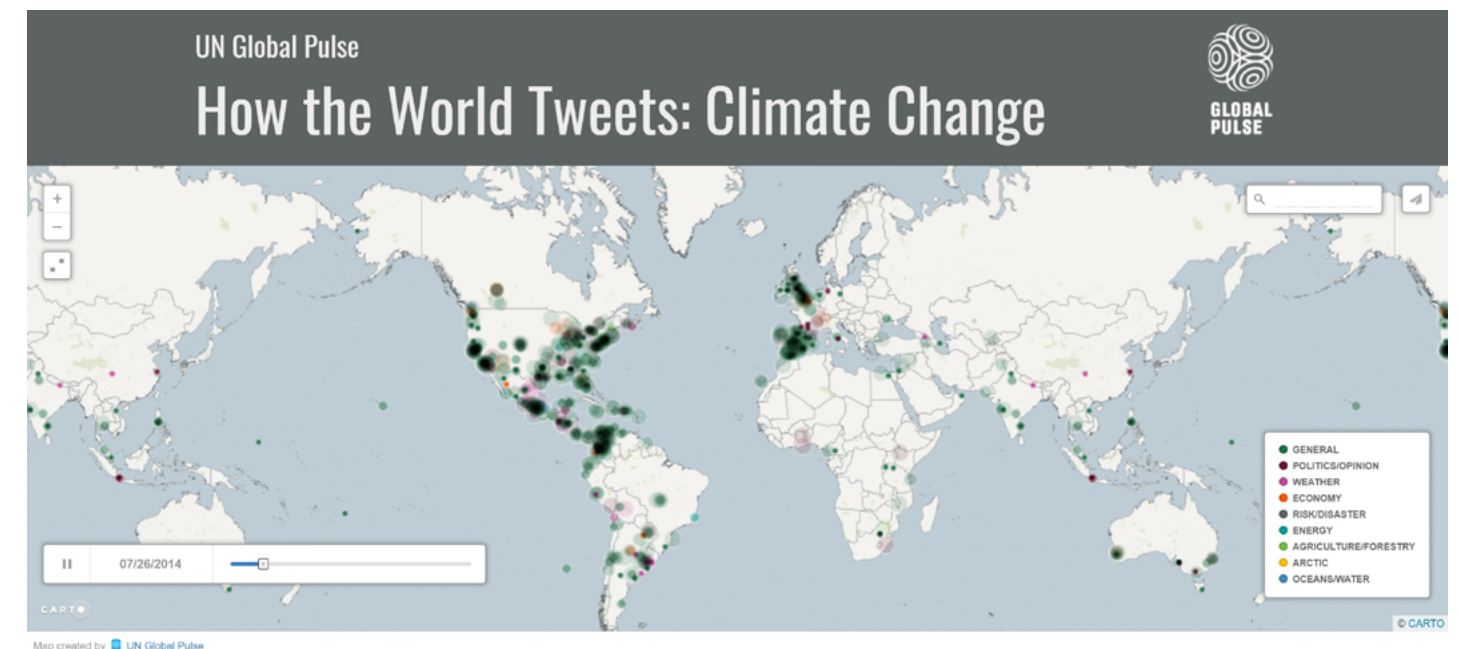

Monitor de redes sociales sobre cambio climático.

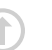

# Entendiendo el potencial de las redes sociales

## Caso de estudio:

### Uso de datos de Twitter para analizar el sentimiento público sobre la reforma de la política de subsidios a los combustibles en El Salvador

**Descripción:** En 2011, El Salvador hizo reformas de política a un subsidio nacional al gas propano, lo que provocó un descontento público generalizado y una serie de huelgas por parte de las empresas distribuidoras. El Banco Mundial y Global Pulse colaboraron en un proyecto de investigación que analiza el contenido y el sentimiento de los tweets para comprender mejor la opinión pública en torno a las reformas.

**Año:** 2015

**Autores:** UN Global Pulse New York

**Referencia:** UN Global Pulse, 'Using Twitter Data to Analyse Public Sentiment on Fuel Subsidy Policy Reform in El Salvador', Global Pulse Project Series, no.13, 2015.

**Link:** <https://www.unglobalpulse.org/wp-content/uploads/2015/02/using-twitter-data-to-analyse-public-sentiment-on-fuel-subsidy-policy-reform-in-el-salvador.pdf>

**Aprendizaje:** El análisis de las redes sociales podría ayudar a revelar impactos inesperados de problemas y eventos relacionados con la política.

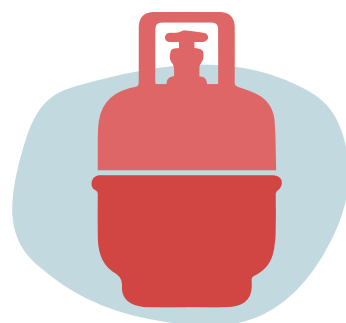



## USING TWITTER DATA TO ANALYSE PUBLIC SENTIMENT ON FUEL SUBSIDY POLICY REFORM IN EL SALVADOR

PARTNER: THE WORLD BANK  
PROGRAMME AREA: ECONOMIC WELLBEING



### SUMMARY

In 2011, El Salvador made policy reforms to a national subsidy on propane gas, causing widespread public disaffection and a series of strikes by distributor companies. The World Bank and Global Pulse collaborated on a research project analysing content and sentiment of tweets in order to better understand public opinion around the reforms. The study demonstrated that public opinion as expressed in social media could complement and potentially replace household survey data if none were available. While a decline in negative sentiment was observed around several issues, including the gas distributor strikes, household survey data from the same period showed an increase in positive sentiment on the reform. This discrepancy showed that analysing social media could help reveal unexpected impacts of issues and events related to policy. In the case of the fuel reform, the research findings showed that the distributor strikes might have contributed to changes in public perception more than previously acknowledged.

### BACKGROUND

In April 2011, the Government of El Salvador removed a countrywide subsidy on liquid petroleum gas (LPG), the most common domestic cooking fuel. Instead of subsidizing prices at the point of sale, the new mechanism delivered an income transfer to eligible households, sparking the controversy. This policy reform resulted in a consumer price increase from \$5.10 to \$13.60 for a 25-pound bottle of LPG.

Although monthly income transfers were given to households with low electricity consumption of less than 200 Kwh per month, which was 94 per cent of the population, the reform was highly unpopular. Based on household surveys conducted by a national newspaper, in January 2011, only 30 percent of the population was in favor of the reform. This low satisfaction rate increased over the next eighteen months before stabilizing at 65 percent in favor in September 2013.

A 2014 study investigated public perceptions and social dynamics of the fuel subsidy reform, illuminating issues and concerns related to the reform such as political partisanship, the level of information reaching communities about the reform and trust in the government's commitment to deliver the subsidy (Calvo 2014). This background research prompted Global Pulse and the world bank to collaborate on a study to explore if social media data could provide similar or new insights on public opinion to potentially complement or substitute household survey data.

### USING TWITTER DATA TO ANALYSE PUBLIC PERCEPTION OF REFORM IN EL SALVADOR

A comprehensive taxonomy of keywords related to the LPG subsidy reform was developed in order to filter Twitter for relevant content. Regional experts were consulted to ensure slang words and synonyms were incorporated into the taxonomy. The taxonomy was based on the five main topics of public concern reflected in the household survey data:

**HOW TO CITE THIS DOCUMENT:**  
UN Global Pulse, 'Using Twitter Data to Analyse Public Sentiment on Fuel Subsidy Policy Reform in El Salvador', Global Pulse Project Series, no.13, 2015.

- **Lack of information:** Tweets that expressed confusion over the subsidy
- **Partisanship:** Tweets that mentioned a political party or ideology
- **Distrust of institutions:** Tweets about the lack of trust in government and gas distributors to carry out the subsidy
- **Personal economic impact:** Tweets about how the subsidy would affect the individual's household economy or livelihood
- **Other:** Tweets about the subsidy that did not fall into the other four categories, such as tweets about how the subsidy related to water or electricity

Each tweet was simplified following a normalization process, such as replacing plural words by singular versions (e.g. "reforms" became "reform"). The taxonomy was used to filter the normalized tweets from periods before, during and after the reform.

| DATE     | DISTRUST INSTITUTIONS | LACK OF INFORMATION | PARTISANSHIP | PERSONAL ECONOMIC IMPACT | OTHER |
|----------|-----------------------|---------------------|--------------|--------------------------|-------|
| Jan 2011 | 24.2                  | 12.1                | 20.2         | 10.5                     | 45.2  |
| Apr 2011 | 24.7                  | 13.4                | 19.0         | 22.5                     | 27.5  |
| May 2011 | 21.1                  | 5.0                 | 13.5         | 18.0                     | 44.4  |
| Aug 2011 | 22.6                  | 9.5                 | 6.0          | 8.3                      | 36.8  |
| May 2012 | 10.1                  | 5.0                 | 14.4         | 5.0                      | 28.8  |
| Aug 2012 | 27.1                  | 15.3                | 116.5        | 10.6                     | 64.7  |
| Sep 2013 | 10.1                  | 5.8                 | 5.8          | 2.2                      | 58.0  |

Results of manually categorizing the tweets by domain experts. Numbers are percentages of the total tweets. Columns do not add up to 100%, as some tweets were assigned to more than one category.

A subset of the filtered tweets was examined to assess relevance and refine the keywords. After three iterations, the final taxonomy provided a high signal-to-noise ratio, meaning a small proportion of tweets unrelated to the reform passed through the filter.

Tweets were filtered a second time to isolate content originating from El Salvador by using the locations publicly expressed in user

Poster del proyecto

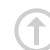

# Entendiendo el potencial de las redes sociales

## Caso de estudio:

### Explorando el papel de los lazos sociales en la reacción de una comunidad ante la pandemia de COVID-19 a través de Twitter

**Descripción:** A medida que se desarrollaba la pandemia por el COVID-19, no existían fuentes oficiales de datos que retrataran las necesidades y estrategias de los ciudadanos para afrontar e innovar los desafíos impuestos por la crisis. En esta investigación, se analizaron más de 700 tuits como una fuente alternativa para capturar distribución geográfica e impacto de iniciativas y estrategias ciudadanas inusuales que surgieron en respuesta a las afectaciones de la pandemia.

**Año:** 2020

**Autores:** Laboratorio de Aceleración de México

**Referencia:** Alvarado, A., & Munguía, J. (2021, November 25). Exploring the role of social ties in a community's reaction to the COVID-19 pandemic through Twitter. UNDP Acclab Mexico.

**Link:** <https://www.mx.undp.org/content/mexico/es/home/blog/20210/11/exploring-the-role-of-social-ties-in-a-communitys-reaction-to-th.html>

**Aprendizaje:** Esta exploración inicial puso de manifiesto la riqueza de enfoques y la pluralidad de formas de saber y hacer en tiempos de crisis.

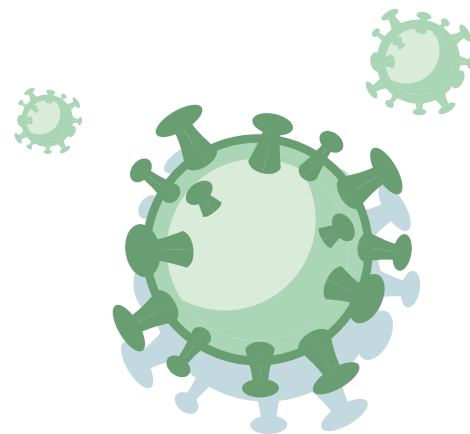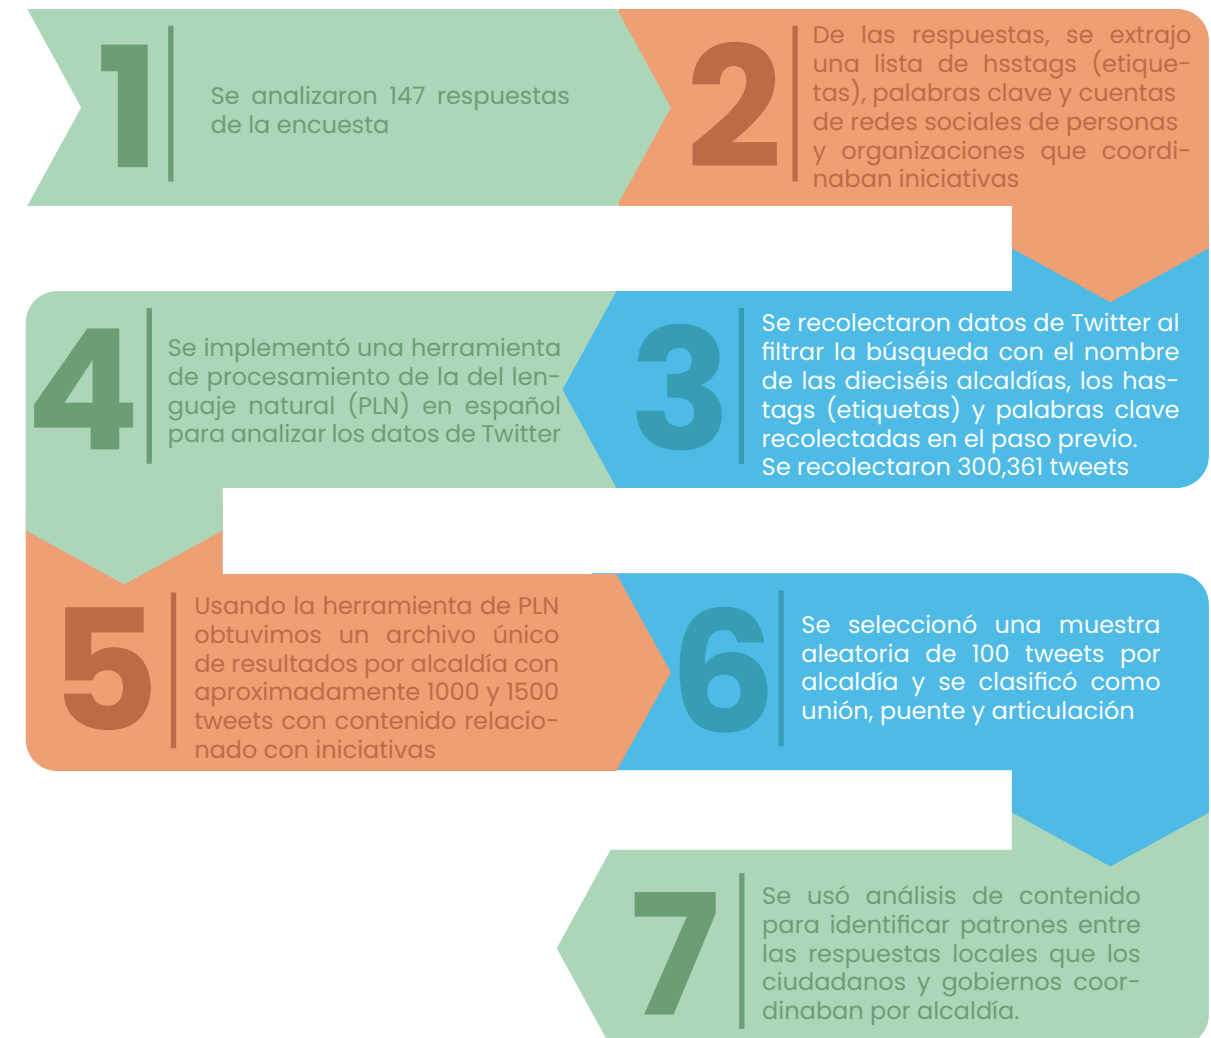

Diagrama que muestra el proceso seguido para la exploración de Twitter.



# Entendiendo el potencial de las redes sociales

## Caso de estudio:

### Explorando el uso de datos de redes sociales como evidencia para la defensa de los derechos humanos

**Descripción:** Esta investigación consistió en utilizar los reportes ciudadanos de personas desaparecidas distribuidos en grupos de Facebook como una fuente alternativa para completar registros oficiales sobre la actual crisis de desapariciones en México.

**Año:** 2020

**Autores:** Adriana Alvarado Garcia, Matthew J. Britton, Dhairya Manish Doshi, Munmun De Choudhury, and Christopher A. Le Dantec.

**Referencia:** Adriana Alvarado Garcia, Matthew J. Britton, Dhairya Manish Doshi, Munmun De Choudhury, and Christopher A. Le Dantec. 2021. Data Migrations: Exploring the Use of Social Media Data as Evidence for Human Rights Advocacy. Proc. ACM Hum.-Comput. Interaction 4, CSCW3, Article 268 (December 2020), 25 pages.

**Link:** <https://dl.acm.org/doi/10.1145/3434177>

**Aprendizaje:** Esta investigación abona a una mejor comprensión de los desafíos y oportunidades de utilizar el conocimiento local de las comunidades en línea para ser utilizado como evidencia en contextos de violaciones de derechos humanos.

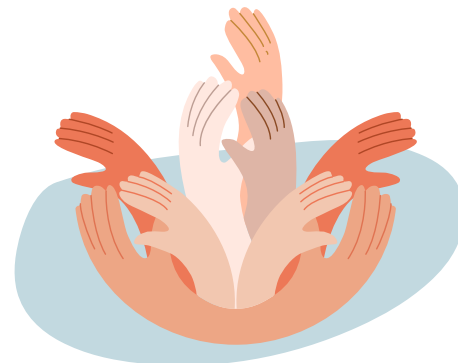



ESTADO DE MÉXICO

**EMERGENCY BULLETIN !!**  
**PERSON MISSING, PLEASE HELP US TO FIND IT**





|                             |             |
|-----------------------------|-------------|
| FOLIO NUMBER                | GENDER:     |
| AGE                         | DATE:       |
| DATE OF BIRTH               | WEIGHT:     |
| HEIGHT                      | SKIN COLOR: |
| COMPLEXION                  | FOREHEAD    |
| FACE:                       | EYEBROWNS:  |
| HAIR:                       | EYES:       |
| NOSE:                       | LIPS:       |
| EARS:                       | CHEEKBONE   |
| MENTON:                     | CHIN:       |
| PLACE:                      |             |
| PARTICULAR CHARACTERISTICS: |             |
| DRESS AND FOOTWEAR          |             |



PROGRAMA PARA LA BÚSCUDA Y LOCALIZACIÓN DE PERSONAS DESAPARECIDAS, NO LOCALIZADAS, AJUSTICIAS Y EXTRAÑICIAS

(01 722) 283 20 12

**LADA SIN COSTO**  
**01 800 89 029 40**

**FISCALÍA GENERAL DE JUSTICIA DEL ESTADO DE MÉXICO**  
Fiscalia especializada para la investigación y persecución de delitos en materia de desaparición forzada y desaparición cometida por particulares  
Paseo Matlazincas 1100, Tercer Piso, Col. La Teresona  
Toluca, Estado de México

Ejemplo de un volante de una persona desaparecida emitido por el gobierno de México (Alvarado, 2021)

# ¿Cómo determinar si los datos de Twitter son los adecuados para informar tu trabajo?

Utiliza el siguiente diagrama de árbol de decisión para decidir si los datos de Tweet son o no la fuente de información más adecuada para informar tu trabajo.

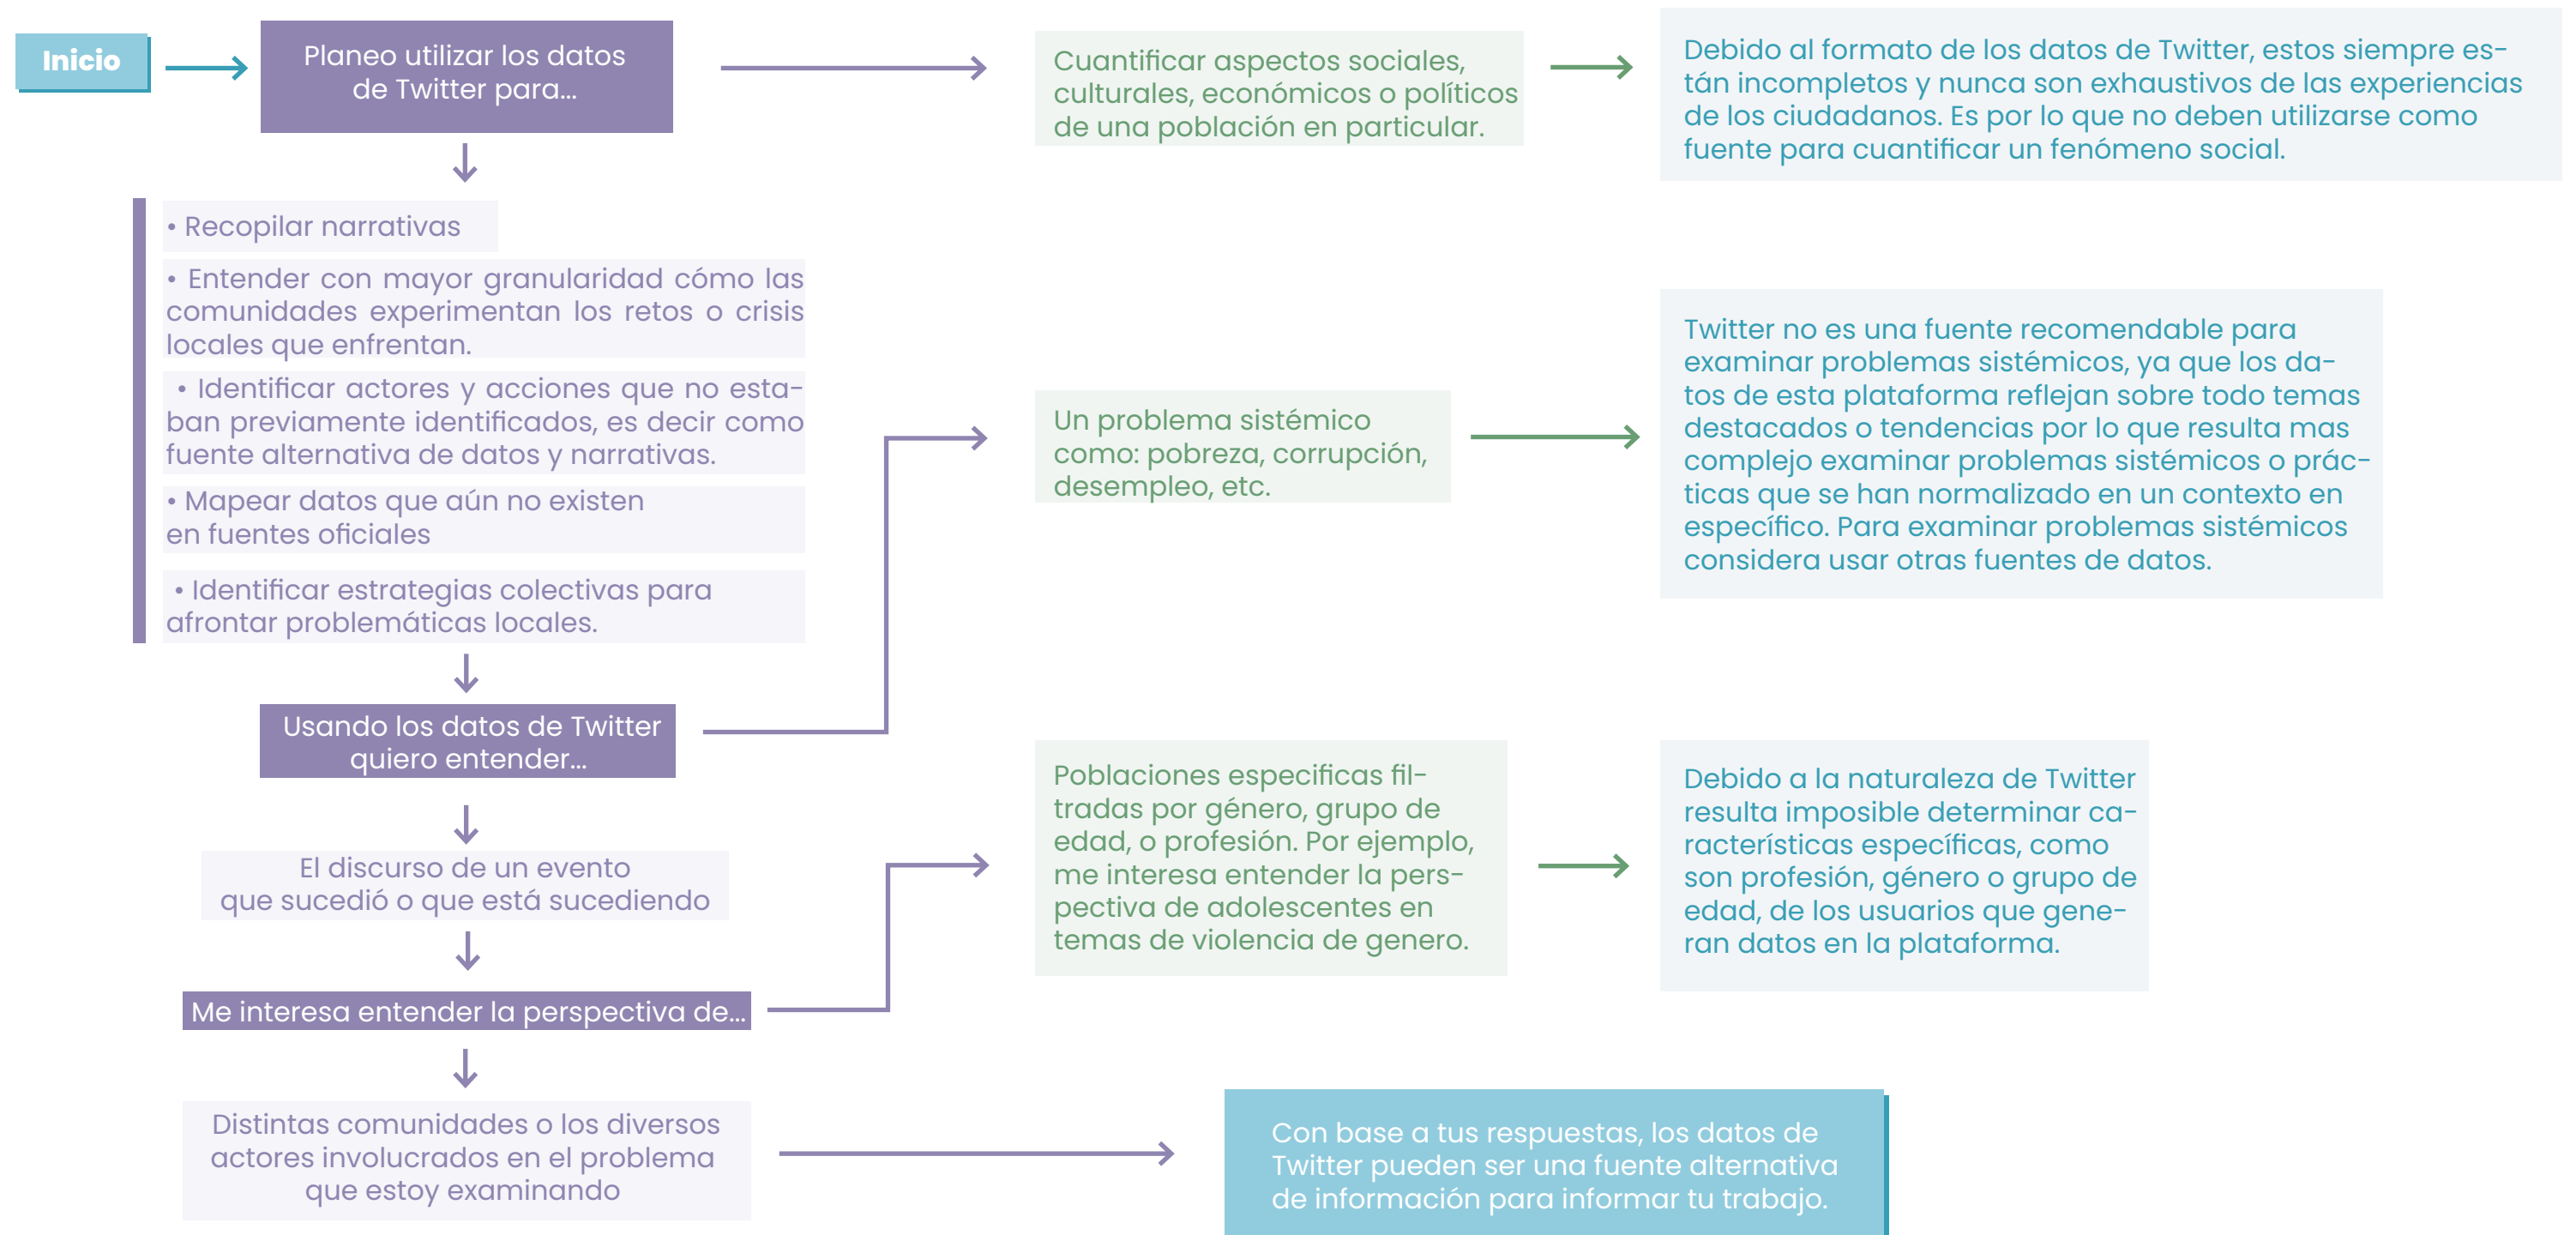

# 03 ANÁLISIS

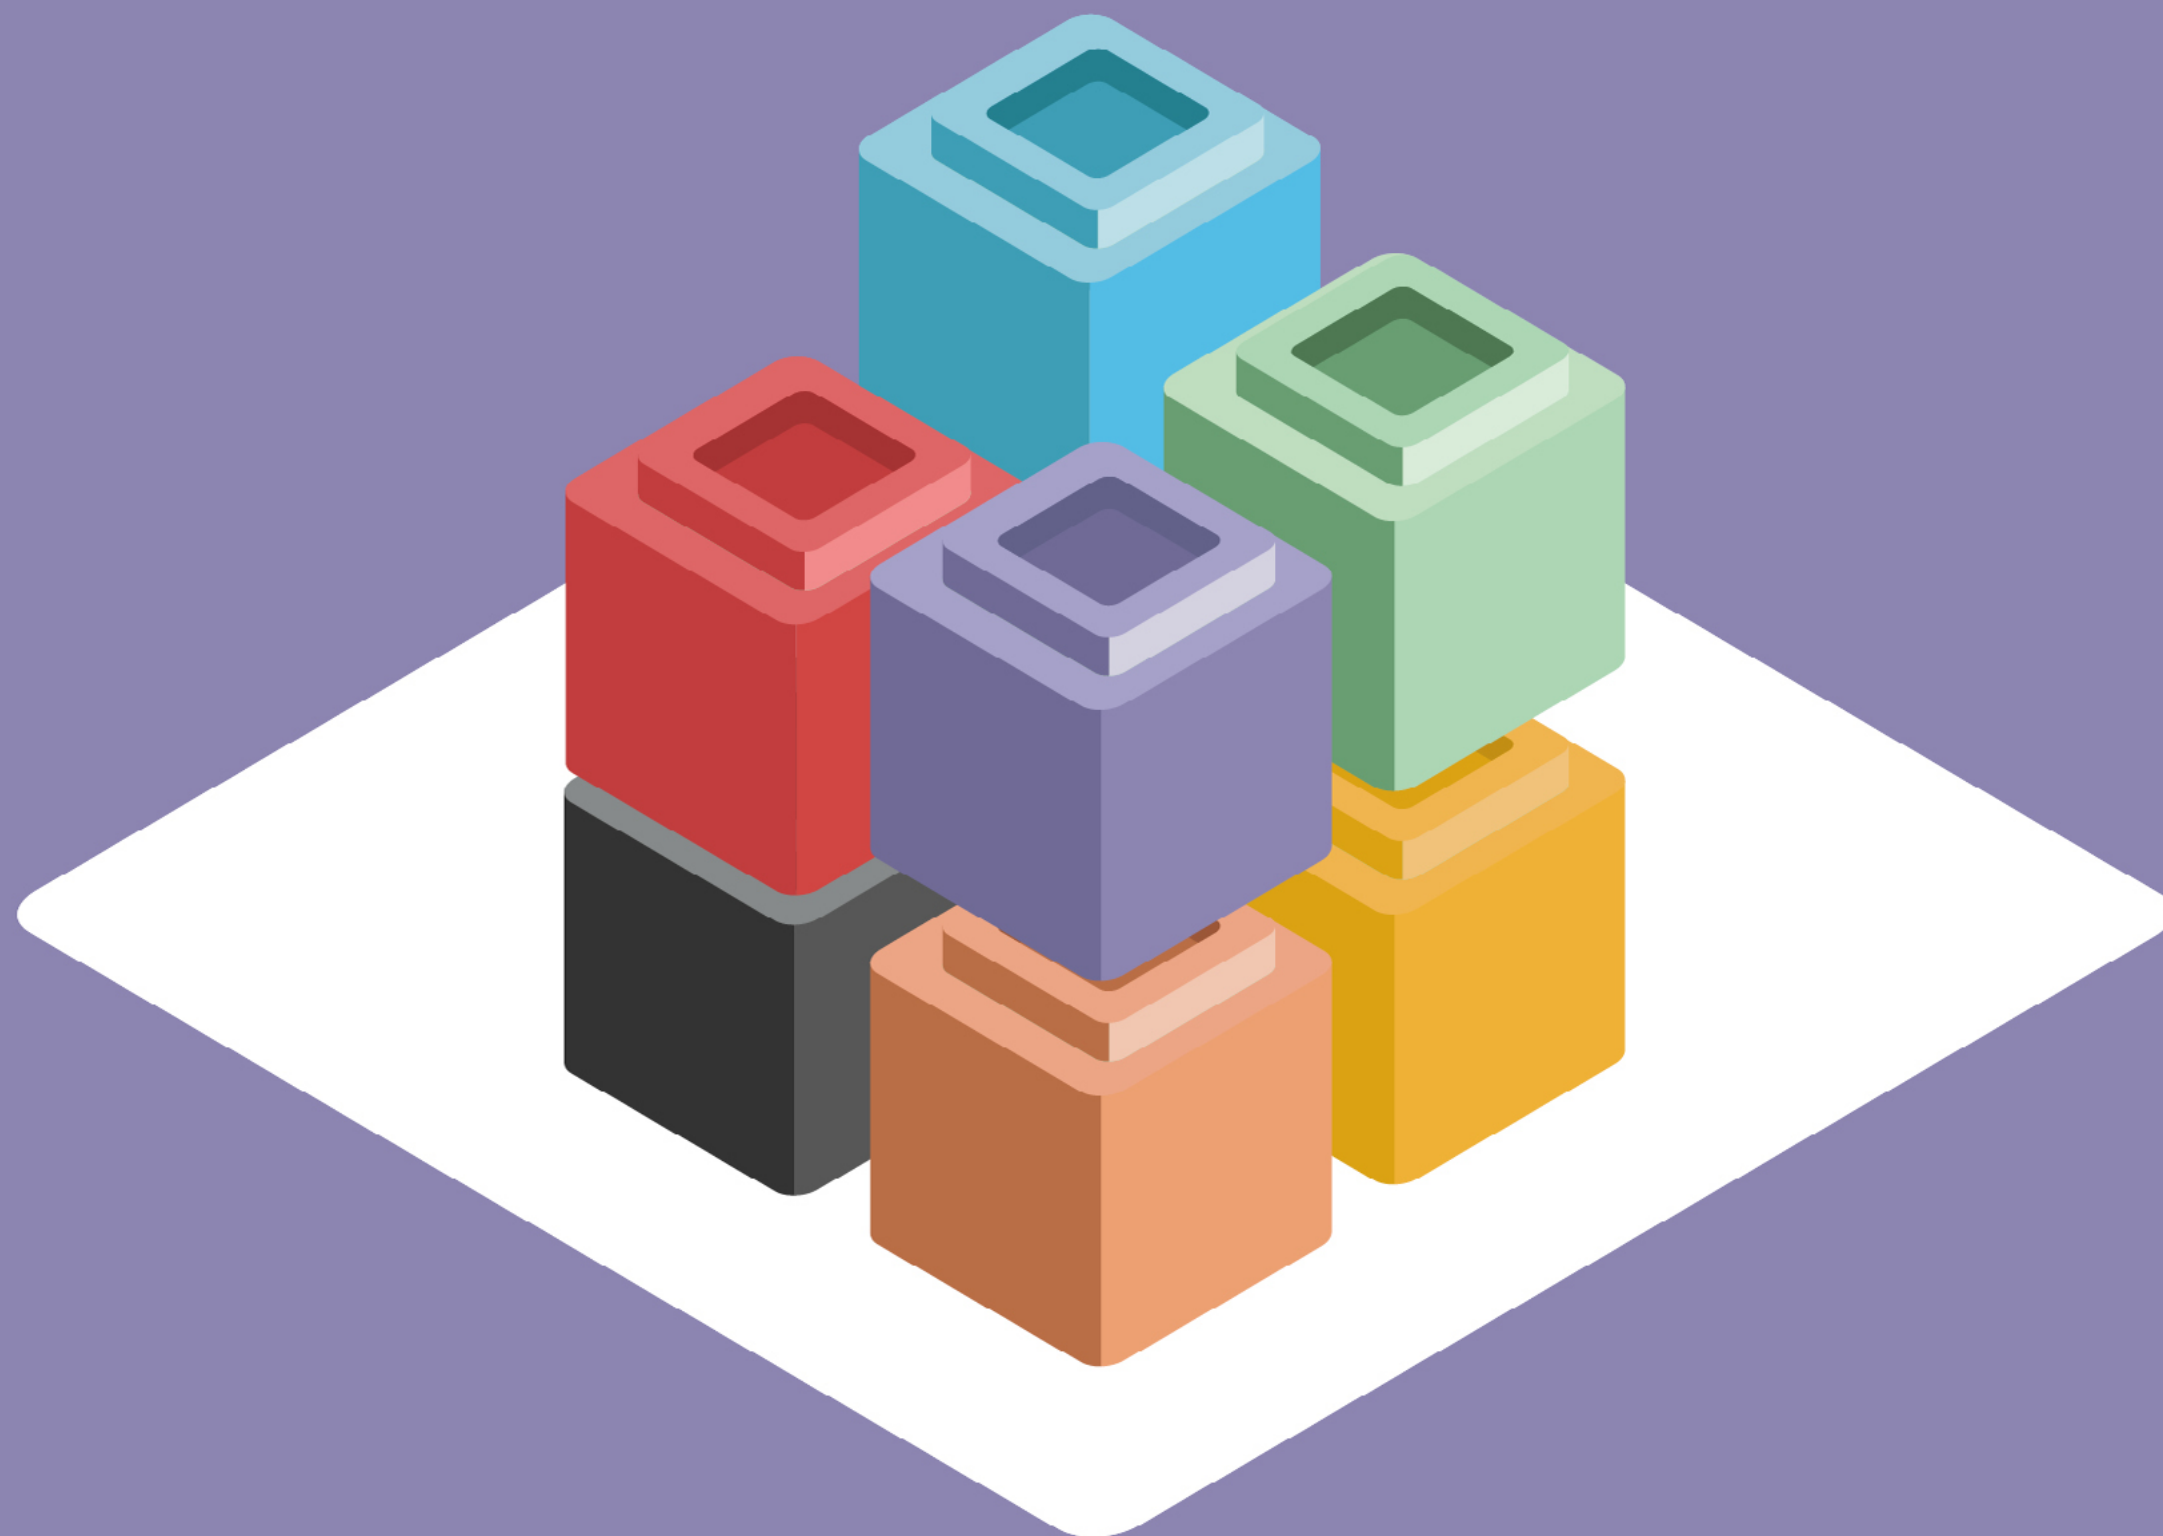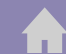

# Análisis

## Introducción

Los datos provenientes de las redes sociales son siempre conjuntos de datos incompletos, ya que debido a su naturaleza no son completamente representativos sino que reflejan únicamente las perspectivas, opiniones y necesidades de una limitada muestra demográfica, específicamente de quienes usan redes sociales. Hay además siempre una restricción impuesta por las propias plataformas de redes sociales quienes determinan el número de datos que es posible recolectar. A pesar de estas limitaciones, los datos de Twitter pueden proporcionar evidencia de las respuestas colectivas, capacidades y particularidades de las comunidades que de otro modo, por ejemplo usando fuentes más tradicionales como las estadísticas gubernamentales, serían difíciles de identificar.

En esta sección se describe el proceso para conducir un análisis que:

1. Distinga las perspectivas de la comunidad y considere el contexto de la producción de los datos
2. Reconozca las limitaciones de los datos de redes sociales en el proceso de interpretación

Esta sección se divide en dos partes:

1. La primera guía a las y los lectores en un proceso de **análisis exploratorio** en donde el objetivo es **definir** el problema en términos de las características de los datos de Twitter, **explorar** cómo se discute el tema de interés en redes sociales, **determinar** si el uso de datos de Twitter es o no pertinente dependiendo de la problemática que se desea examinar, y **evaluar** si la narrativa observada es de interés para llevar a cabo un estudio de mayor profundidad.

2. La segunda parte ofrece una descripción de cómo conducir un **análisis cualitativo a profundidad** enfatizando la reflexión sobre el proceso de interpretación, el cual inicia con la construcción del conjunto de datos a analizar, incluyendo la selección de la plataforma, las palabras clave que guían la búsqueda y recolección de tuits. Como resultado de este proceso las y los lectores podrán recopilar, interpretar, y sintetizar datos de Twitter para generar hallazgos que informen su investigación.

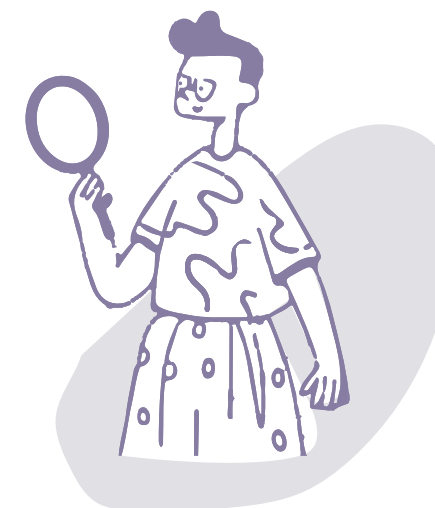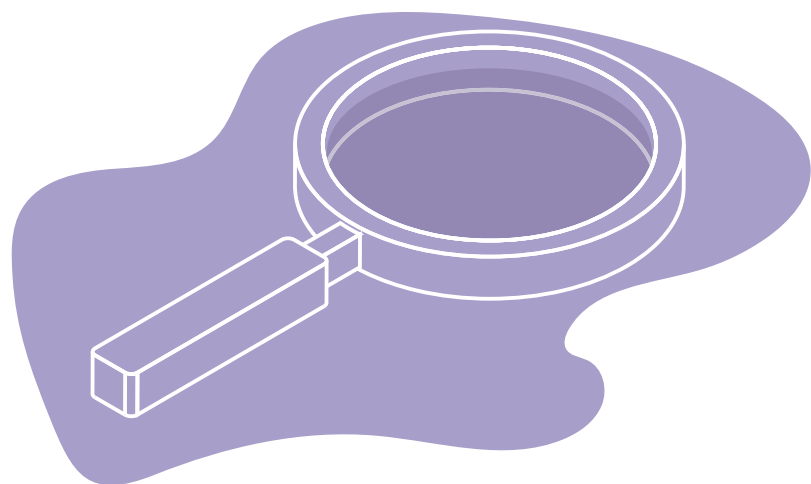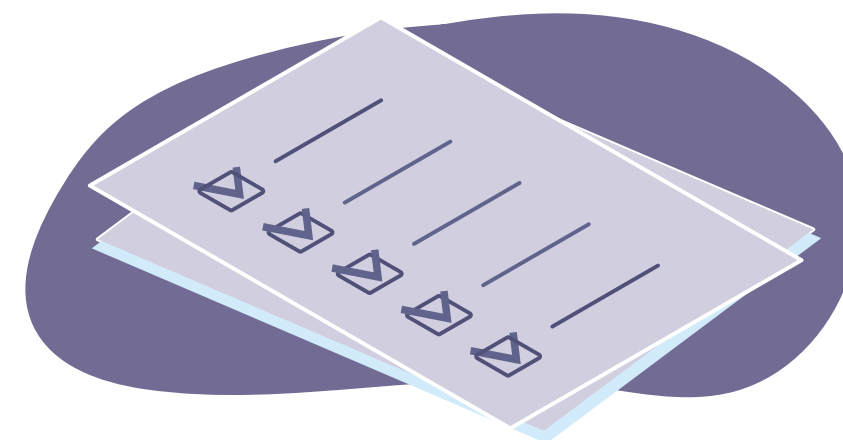

## Proceso de análisis

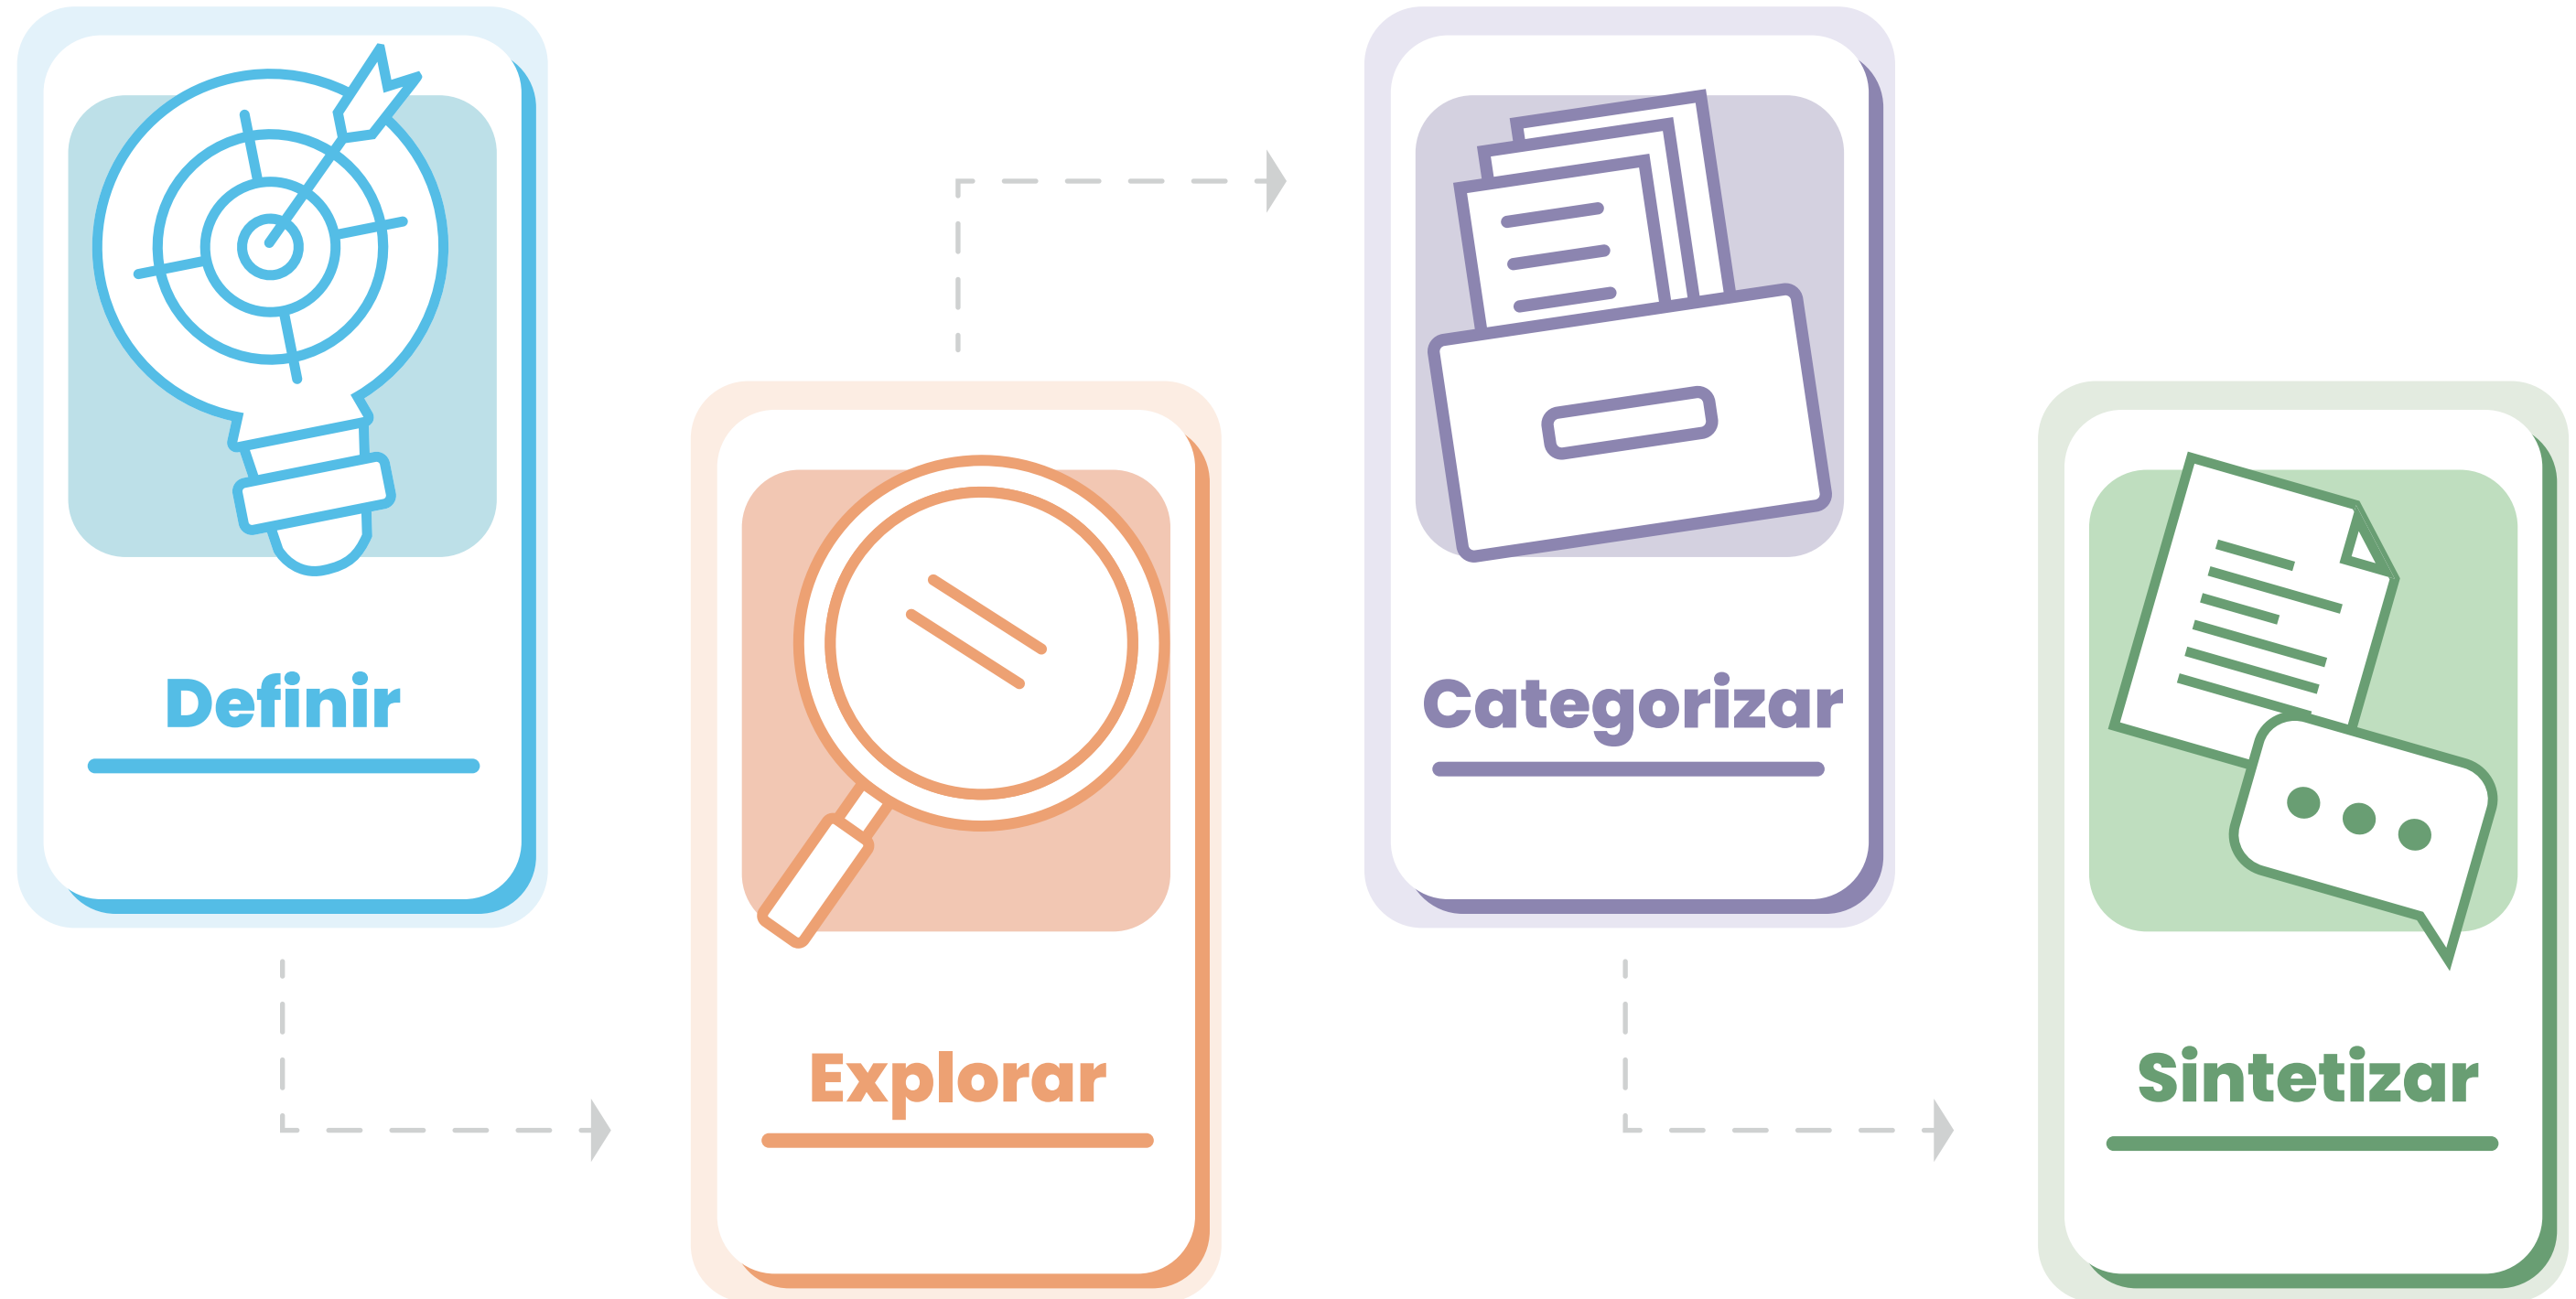

# Análisis exploratorio

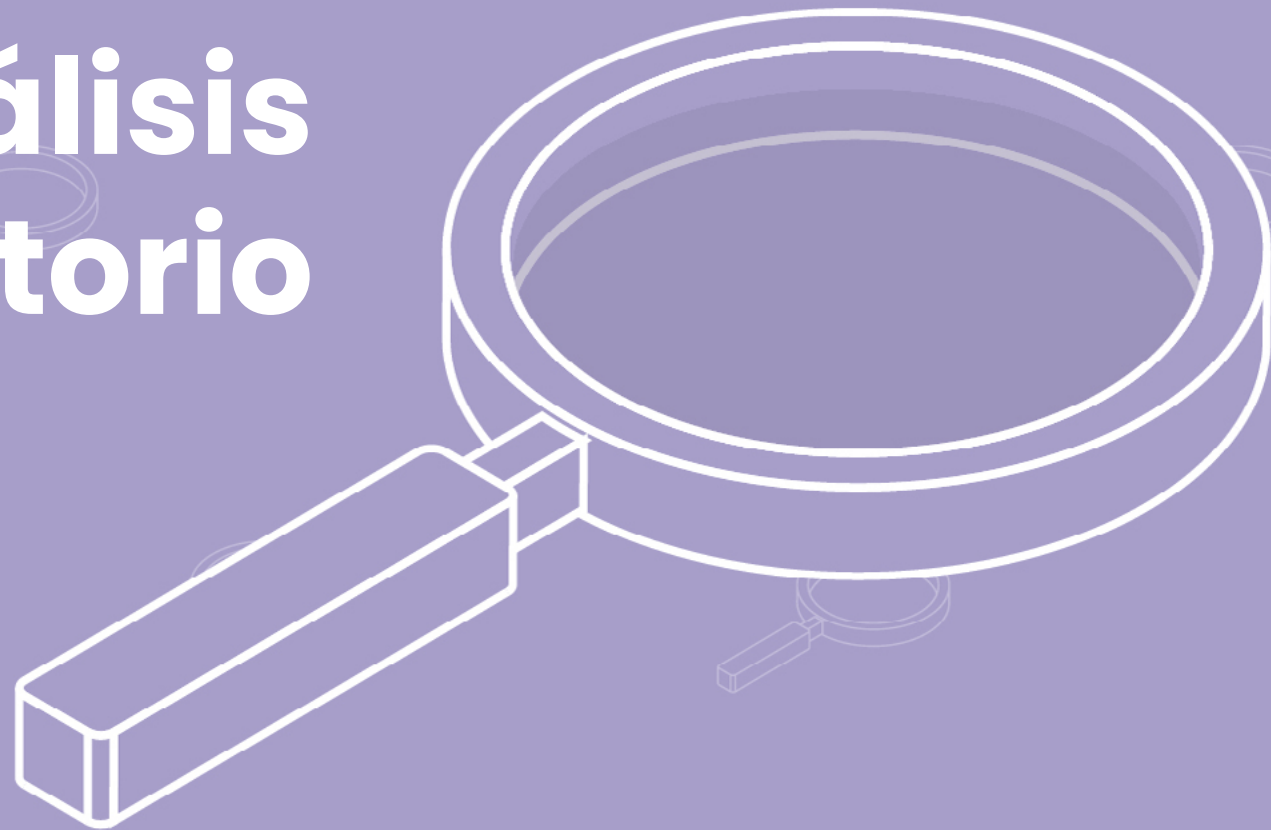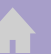



## Análisis | Exploración

### Definición del problema

El primer paso del análisis exploratorio consiste en definir el problema que se desea explorar en Twitter. La definición consiste en identificar y enmarcar el problema que se explorará tanto para comunicar el alcance como el enfoque del análisis de datos de Twitter.

#### Herramientas:

Para acompañarte en el proceso de definición del problema, este kit incluye tres herramientas que sirven como guía. Se recomienda utilizarlas en el siguiente orden:

#### Plantilla de definición del problema:

Primero se recomienda llenar esta plantilla, la cual te permitirá recopilar información sobre el contexto y las comunidades involucradas en el problema, así como documentar la evidencia y los datos existentes. Al completar esta plantilla, reflexiona sobre los objetivos y las expectativas sobre utilizar datos de Twitter.

#### Diagrama de árbol de decisión:

Ahora que ya has recopilado más información sobre el contexto del problema que se pretende informar con datos de Twitter, te recomendamos utilizar el árbol de decisiones para evaluar si Twitter es o no una fuente apropiada.

#### Plantilla para documentación de palabras clave:

Utiliza esta plantilla para recopilar palabras clave que describan las características del problema, las poblaciones, comunidades u organizaciones involucradas. Así mismo, se recomienda la recolección de hashtags y cuentas de Twitter de aquellos actores que sean representativos del tópic a explorar. Si desconoces nombres de cuentas de Twitter, reflexiona sobre los factores que dan forma al problema que deseas examinar, piensa en palabras características de esos factores y con ellas busca cuentas de Twitter.

## Paso 1 | Definición del problema

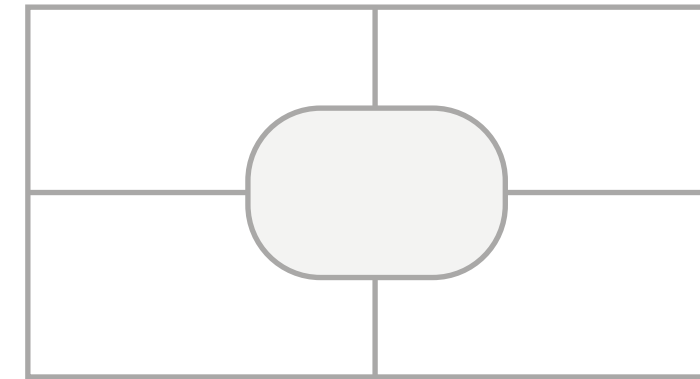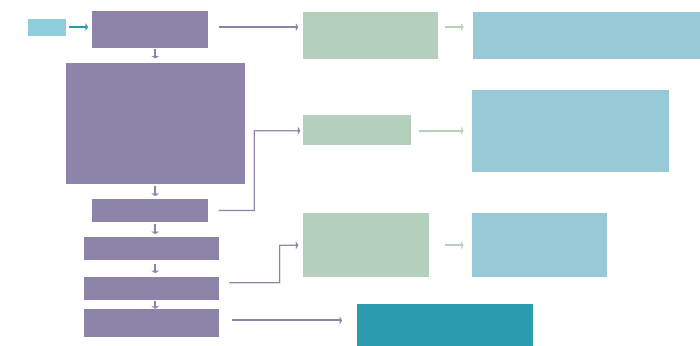

| Palabra clave | Palabra clave | Palabra clave | Palabra clave | Palabra clave |
|---------------|---------------|---------------|---------------|---------------|
| _____         | _____         | _____         | _____         | _____         |
| _____         | _____         | _____         | _____         | _____         |
| _____         | _____         | _____         | _____         | _____         |
| _____         | _____         | _____         | _____         | _____         |
| _____         | _____         | _____         | _____         | _____         |
| _____         | _____         | _____         | _____         | _____         |
| _____         | _____         | _____         | _____         | _____         |
| _____         | _____         | _____         | _____         | _____         |
| _____         | _____         | _____         | _____         | _____         |

## Exploración inicial de Twitter

El segundo paso del análisis exploratorio consiste en hacer una exploración inicial del problema en Twitter. Utilizando las palabras clave, cuentas de Twitter y hashtags recopilados en el paso anterior se realiza una búsqueda inicial con el objetivo de recopilar evidencia de cómo luce en Twitter el problema que se está examinando y así:

Determinar si el tópico es o no discutido en Twitter

Entender cómo se habla del tema

Identificar quienes son las comunidades, organizaciones, o actores que son parte de la conversación

Este paso es iterativo, es decir debe repetirse sucesivamente y en cada iteración sugerimos recopilar más palabras, cuentas de Twitter y hashtags para informar, dirigir y refinar las siguientes exploraciones.

Durante la exploración se recomienda también documentar los hallazgos de la búsqueda de las diferentes palabras clave con el objetivo de identificar actores, acciones, y discursos que nos informen sobre la narrativa de un problema. Se sugiere que al realizar cada búsqueda se documenten los resultados considerando los siguientes aspectos:

## Tipo de contenido:

Documenta el contenido que se comparte en Twitter en relación con las búsquedas realizadas. Por ejemplo, documenta si la tendencia es compartir noticias, fotografías, videos, etc.

## Tipo de discurso:

Registra los tipos de discurso y discusiones observadas en los resultados. Por ejemplo, registra si los resultados arrojaron tuits que reflejen quejas, acciones locales, etc.

## Actores involucrados:

Documenta quien o quienes están discutiendo el tema. Registra el tipo de cuentas que comparten información relevante sobre el tema examinado. Por ejemplo, observa si las cuentas que publican o comparten información sobre el tema a examinar son de ciudadanos, de organizaciones no gubernamentales, del gobierno, de instituciones, activistas, periodistas, etc. En paralelo al registro, reflexiona sobre los patrones de los actores involucrados, por ejemplo que actores prevalecen en la mayoría de los resultados y qué actores están ausentes.

## Disponibilidad de datos:

Documenta la disponibilidad de la información encontrada sobre el tema objetivo. El objetivo no es cuantificar los tuits sobre un tema específico sino más bien hacer una breve inspección sobre la frecuencia de tuits que reflejan el tema examinado.

En paralelo, se recomienda comparar los hallazgos preliminares obtenidos en Twitter con los datos de fuentes tradicionales y reflexiona si existe alguna información que esté disponible en las redes sociales que no se refleje en las típicas fuentes de datos.

Por último, durante la exploración, procura identificar los patrones y perspectivas que prevalecen en los resultados así como las que están ausentes.





## Análisis | Exploración

### Categorización de hallazgos iniciales

El tercer paso del análisis exploratorio consiste en hacer una categorización de los hallazgos iniciales. El objetivo es asociar el contenido de los tuits identificados en el paso anterior con la definición del problema que se está examinando. Para ello, es necesario revisar los hallazgos del paso dos y definir qué tipo de tuits son emblemáticos o codifican las dimensiones del tema investigado. Hacer esta asociación te permitirá decidir si Twitter es o no una fuente de información útil para tus objetivos y si es o no conveniente hacer una siguiente exploración analizando a mayor profundidad los datos de Twitter.

Durante la categorización se recomienda prestar atención a los siguientes aspectos:

#### Redundancia y patrones de información:

En este contexto, se entiende por redundancia la información que se repite en los datos de Twitter. En algunos casos, observar redundancia en los datos denota patrones de información, lo que a su vez puede contribuir a confirmar acciones de un grupo en específico o bien proporcionar nuevas perspectivas y conocimientos del tema que se está estudiando. La redundancia en los datos de Twitter puede tomar distintas formas, por ejemplo:

- El tipo de organizaciones o comunidades que más tuitean sobre un tema en específico
  - El tipo de contenido que comparten las organizaciones
  - La población o comunidad que más tuitea sobre un problema o situación, por ejemplo: adolescentes, activistas, trabajadores del gobierno, etc.
  - El tipo de peticiones que un grupo en específico tuitea
- Buscar estos patrones durante las búsquedas exploratorias permitirá definir mejor los temas y perspectivas que se desean ahondar más y aquellos que se deseen omitir.

#### Información no documentada en fuentes de datos tradicionales:

Como se ha mencionado anteriormente, una de las fortalezas de los datos de Twitter es que reflejan perspectivas que no siempre están documentadas en fuentes de información tradicionales. Por lo tanto se recomienda evaluar si los datos encontrados en Twitter evidencian actores, poblaciones o estrategias de las comunidades afectadas que anteriormente no se conocían o habían considerado.

## Paso 3 | Categorización de hallazgos iniciales

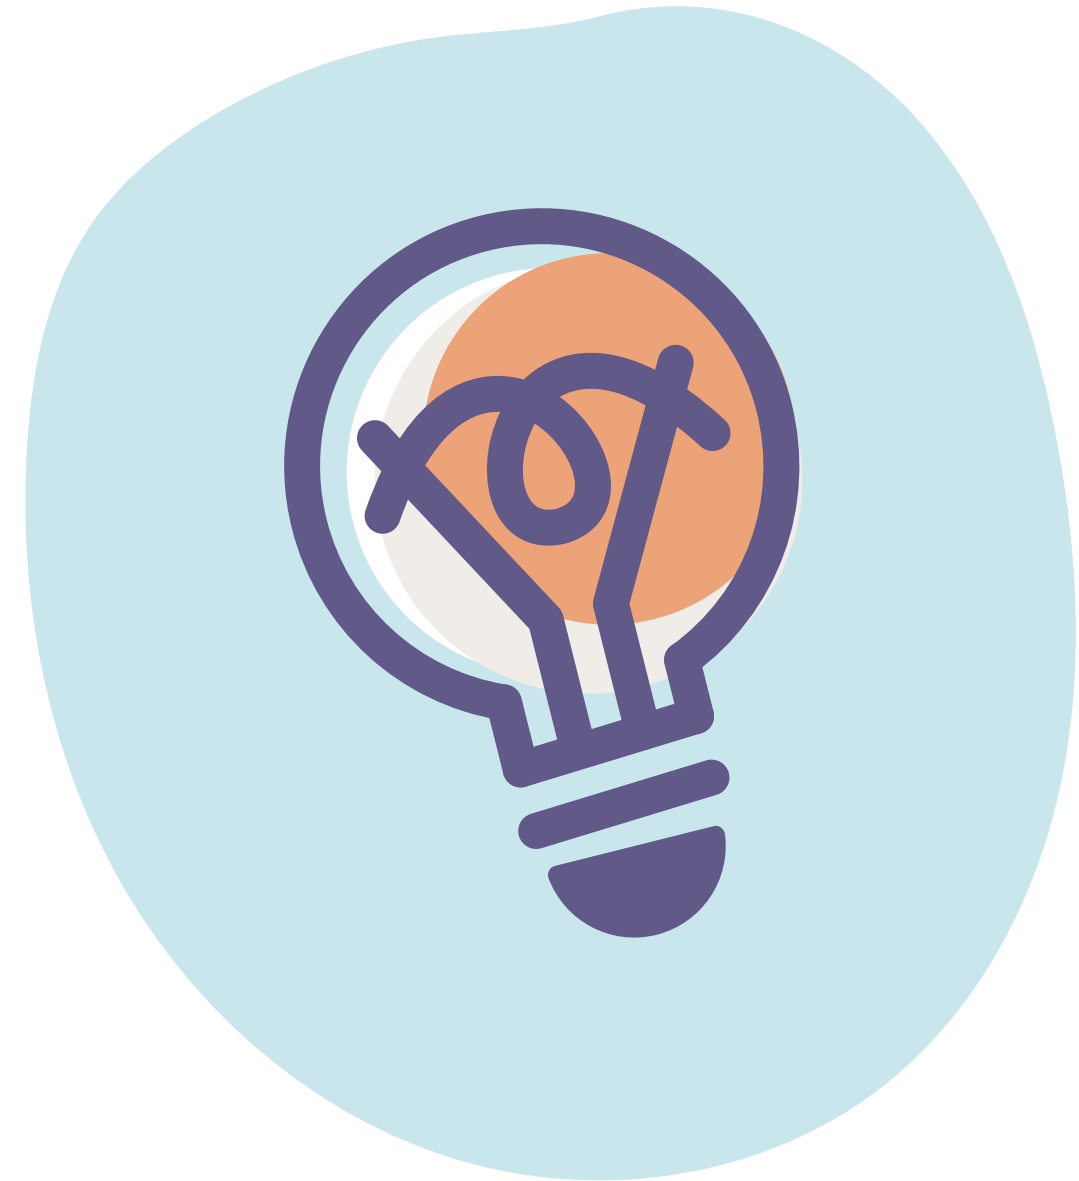

## Análisis | Exploración

Este kit incluye dos plantillas de trabajo que te acompañarán en el proceso de categorización de hallazgos iniciales. Se recomienda utilizarlas en el siguiente orden:

### Plantilla de documentación de hallazgos y observaciones:

Para completar esta plantilla, utiliza como insumo el contenido de la plantilla para documentación de búsquedas exploratorias del paso dos. Para hacer la categorización de tuits puedes usar un diagrama de afinidad o bien puedes simplemente identificar las categorías que se repitan en la plantilla y capturar los hallazgos que te resulten más relevantes.

Se recomienda registrar ejemplos de tuits que sean ilustrativos de los hallazgos, ya que esto facilita la comunicación de resultados.

### Plantilla de documentación de siguientes pasos:

Utiliza esta plantilla para reflexionar sobre las observaciones recopiladas en las búsquedas exploratorias y evalúa si la narrativa observada en Twitter es de interés para realizar un análisis más profundo. Al finalizar de completar esta plantilla deberás decidir si es o no recomendable continuar usando datos de Twitter para informar el problema examinado.

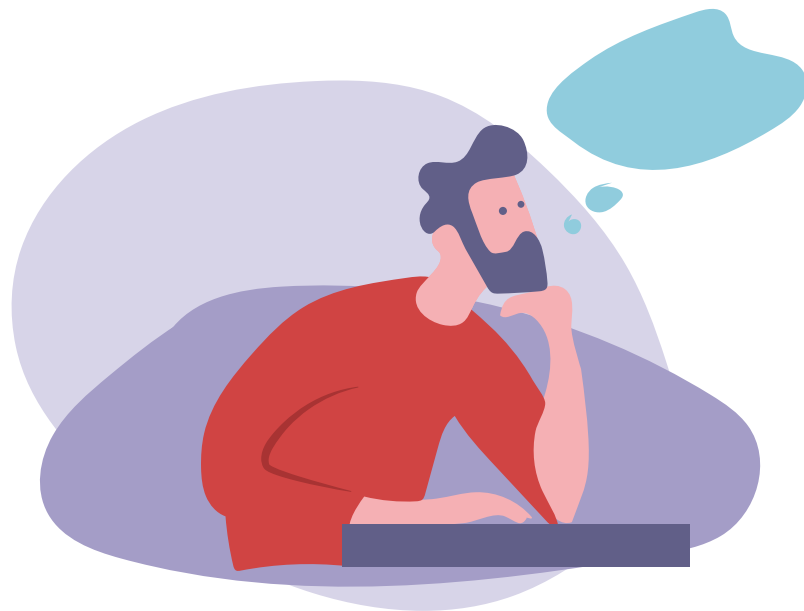

## Paso 3 | Categorización de hallazgos iniciales

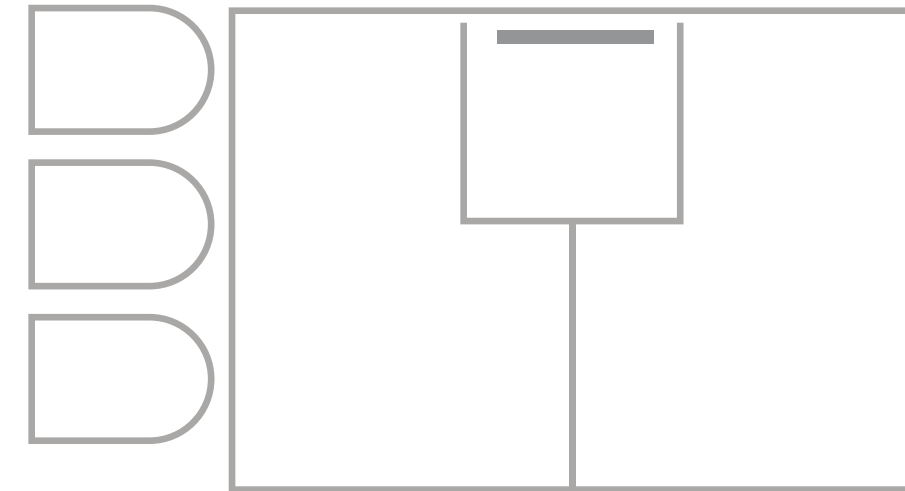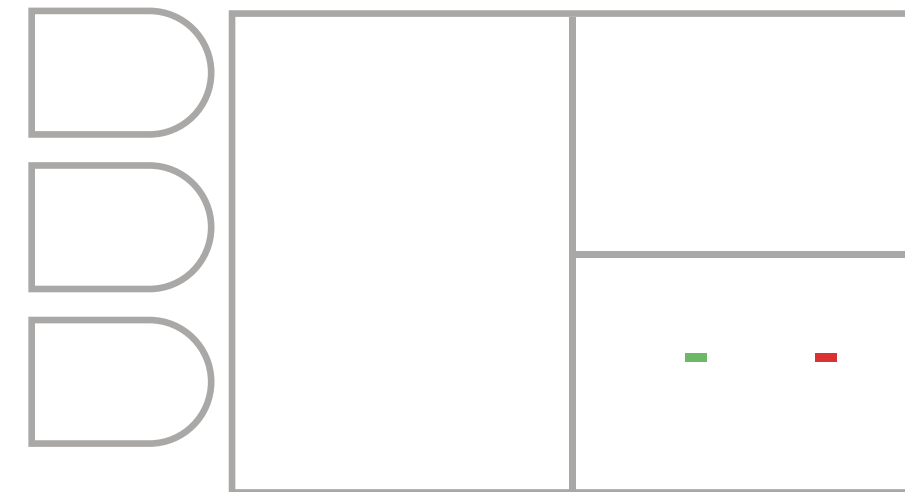

# Análisis cualitativo

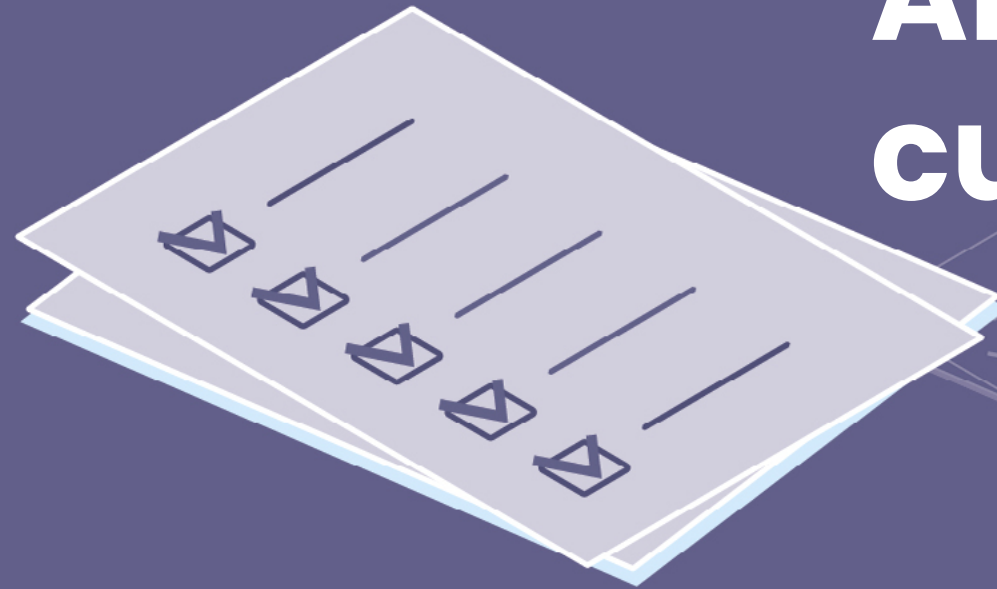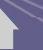



## Análisis | Cualitativo

### Selección de conjunto de datos

El segundo paso del **análisis cualitativo a profundidad** consiste en seleccionar un conjunto de datos de Twitter más específico para conducir un análisis a profundidad.

Una vez recolectados los tuits con la herramienta del módulo 1, utiliza la herramienta del módulo 2 para identificar los tuits que contienen contenido similar al problema que se está examinando.

Revisa la sección de Herramientas computacionales de este manual para una descripción detallada de cómo utilizar la herramienta del módulo 2.

Después de usar la herramienta del módulo 2, es posible que el número resultante de tuits sea aún bastante alto, por ejemplo más de 1000 tuits. Si este fuera el caso, se recomienda reducir todavía más el número de tuits para el análisis cualitativo con una segunda iteración, seleccionando aleatoriamente tuits lo cual puede hacerse utilizando la función aleatoria de Excel. El número de tuits seleccionados aleatoriamente dependerá de la capacidad que se tenga para analizarlos manualmente. Si se cuenta con un tiempo reducido, se sugiere seleccionar entre 20 y 50 tuits por tema para analizarlos a profundidad.

Alternativamente, se puede hacer el segundo filtrado de tuits seleccionando únicamente aquellos que incluyan alguna palabra o término que haga referencia a zonas geográficas (estados o alcaldías), actores, palabras o hashtags específicos.

La selección de conjunto de datos es un paso iterativo y el objetivo es reducir los tuits para hacer un análisis cualitativo a profundidad. Por lo tanto, el resultado de este paso debe ser un número manejable de tuits que puedan analizarse a detalle.

## Paso 2 | Selección de conjuntos de datos

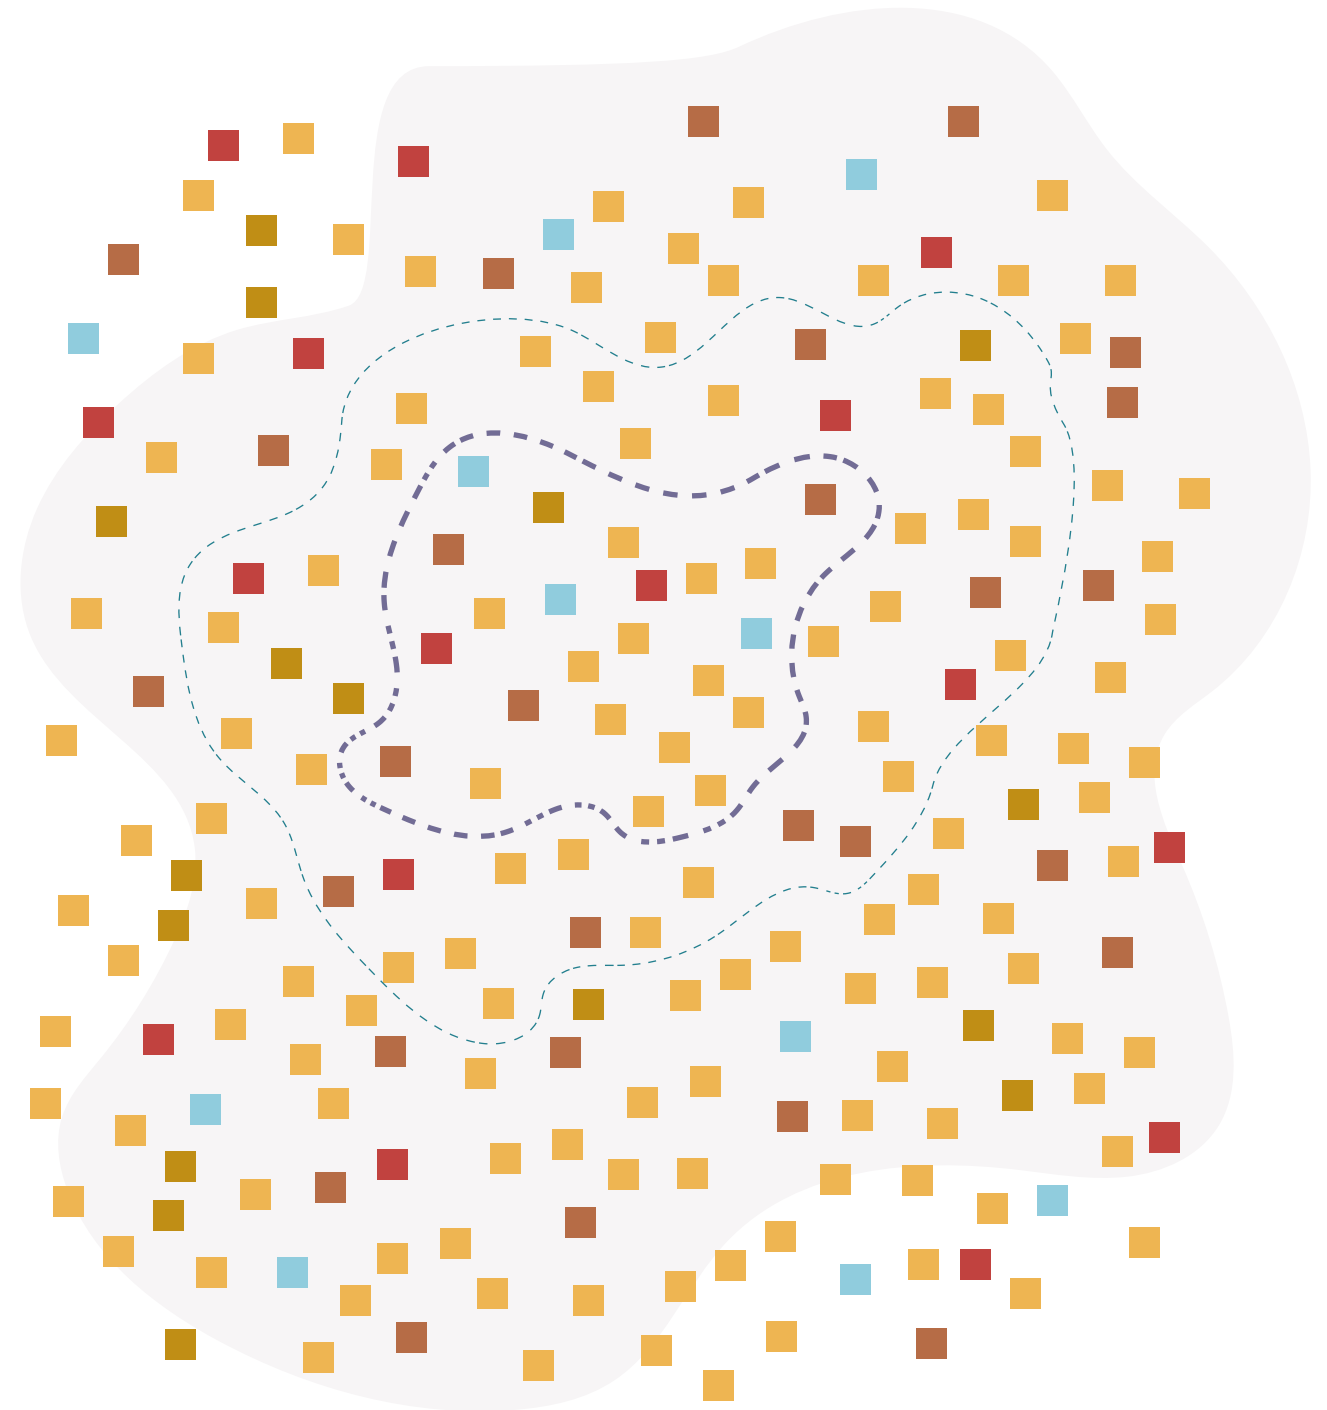





## Análisis | Cualitativo

### Categorización de tuits

El cuarto paso del análisis cualitativo a profundidad consiste en identificar las diversas expresiones o formas en que se manifiesta en Twitter el problema que se está investigando. Para ello, es necesario categorizar el conjunto de tuits que se definió y documentó en los pasos anteriores.

La categorización debe hacerse siguiendo una clasificación previamente definida con contrapartes involucradas en el proyecto o bien de forma colaborativa, esto con el fin de hacer una interpretación de los datos de forma consensuada. Para definir las categorías se recomienda leer y extraer las categorías que representen el tópico examinado.

Una vez definidas las categorías se recomienda organizar los tuits con el fin de identificar patrones, para ello se sugiere hacer un diagrama de afinidad, el cual está descrito en la sección de herramientas cualitativas de este manual.

Por último, cabe señalar que la categorización de tuits es un paso iterativo y debe repetirse hasta que se hayan definido suficientes categorías que describan satisfactoriamente el problema que se está examinando. En la imagen de la derecha se muestran dos ejemplos de tuits que se clasificaron como evidencia del capital social de puente [1] durante la exploración del rol de los lazos sociales en la reacción de comunidades ante la pandemia de COVID-19 [2].

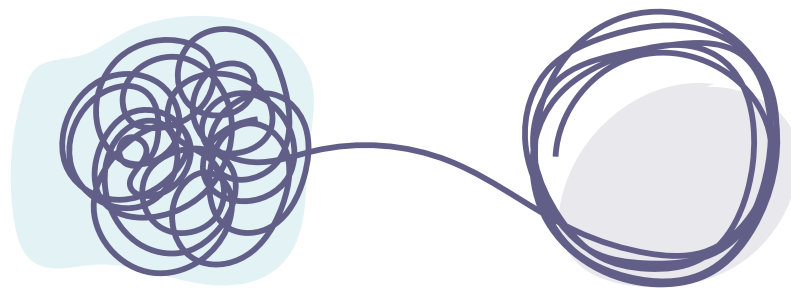

[1] El capital social de puente es aquel que conecta a diferentes tipos de personas y grupos (étnicos, sociales, de género, política o regional, etc.)

[2] Munguia, J., & Alvarado, A. (2021, December 2). Exploring the role of social ties in a community's reaction to the COVID-19 pandemic through Twitter: El PNUD en México. UNDP

## Paso 4 | Categorización de tuits

Nombre  
@Nombre de usuaria

Restaurante @NostosMx tuvo una gran iniciativa y preparó 150 cenas para el personal médico del Hospital General de Iztapalapa. Cada vez que pides a domicilio, se dona una parte para esta gran labor altruista. Les recomiendo pida a domicilio la ensalada griega ¡Es deli!

Translate Tweet

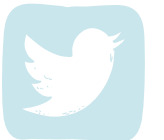

Tweet de un ciudadano que muestra a un grupo de vecinos donando alimentos

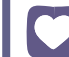

Nombre  
@Nombre de usuaria

En estos tiempos de Solidaridad con la humanidad #RedCiudadana y las #MujeresEmbajadoras visitamos el Predio Matlalochi Col Valle de Luces @Aic\_Iztapalapa Apoyando a la gente que tanto necesita alimentos por que no se encuentran en los programas @GobCDMX #COVID19

Transl

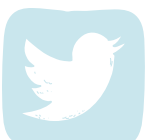

Tweet que describe la iniciativa de un restaurante que donó 150 cenas para el personal médico

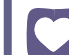



## Análisis | Cualitativo

### Síntesis

El quinto y último paso del análisis cualitativo a profundidad consiste en sintetizar la información recopilada y categorizada en los pasos anteriores. El objetivo de este paso es darles sentido a los tuits recopilados buscando patrones y correlaciones en los datos para responder a las preguntas iniciales que motivaron el estudio. El resultado de este paso debiera ser una caracterización del problema que se está examinando.

Como ya se ha mencionado anteriormente, los datos de las plataformas de redes sociales siempre están incompletos, debido a sus limitaciones en términos de representación. Por lo tanto, las observaciones recopiladas a través de Twitter nunca serán exhaustivas de las problemáticas sociales que se están examinando. Sin embargo, los datos provenientes de Twitter pueden ofrecer evidencia de reacciones, respuestas y perspectivas colectivas de problemas sociales que de otro modo resultaría imposible de identificar. Teniendo en cuenta tales limitaciones y restricciones sugerimos que lo más apropiado para dar sentido a los datos recopilados en Twitter es seguir un enfoque holístico en la interpretación de los datos y entender la problemática que se está examinando. Este enfoque holístico puede tomar diversas formas, pero el objetivo central es caracterizar los distintos componentes como son actores, geografías, perspectivas y temáticas que delinean el problema examinado. Por lo tanto, esta caracterización va estrictamente ligada con cómo se ha enmarcado inicialmente el problema y las preguntas que se buscan responder.

Utilizando como insumos los resultados de los pasos 3 y 4 identifica las posibles conexiones entre las categorías. Después resume los hallazgos con un enfoque holístico, como se describe en los párrafos anteriores. A continuación se enlistan algunas sugerencias de las posibles formas de organización de los datos:

**Áreas geográficas:** Haciendo observaciones y comparaciones que tomen como eje las geografías de los actores involucrados. Es decir, si los datos así lo permiten, centrar el análisis en las particularidades, diferencias, capacidades y necesidades de comunidades, dependiendo de su localidad geográfica, esto puede ser por alcaldía, ciudad o estado.

**Tipo de solución:** Soluciones que responden a necesidades locales pero que también dejan de manifiesto el aprovechamiento de las capacidades de las comunidades.

**Acción - situación:** Observaciones o hallazgos que ejemplifiquen una acción o respuesta colectiva ante una situación particular.

**Problemáticas locales:** Hallazgos que ilustren problemáticas arraigadas a las particularidades de las comunidades. Independientemente de la organización del análisis, lo que se recomienda es seguir un enfoque centrado en:

- Identificar perspectivas, capacidades y conocimientos dentro de la comunidad que no se habían considerado anteriormente
- Responder las preguntas iniciales que motivaron el estudio

## Paso 5 | Síntesis

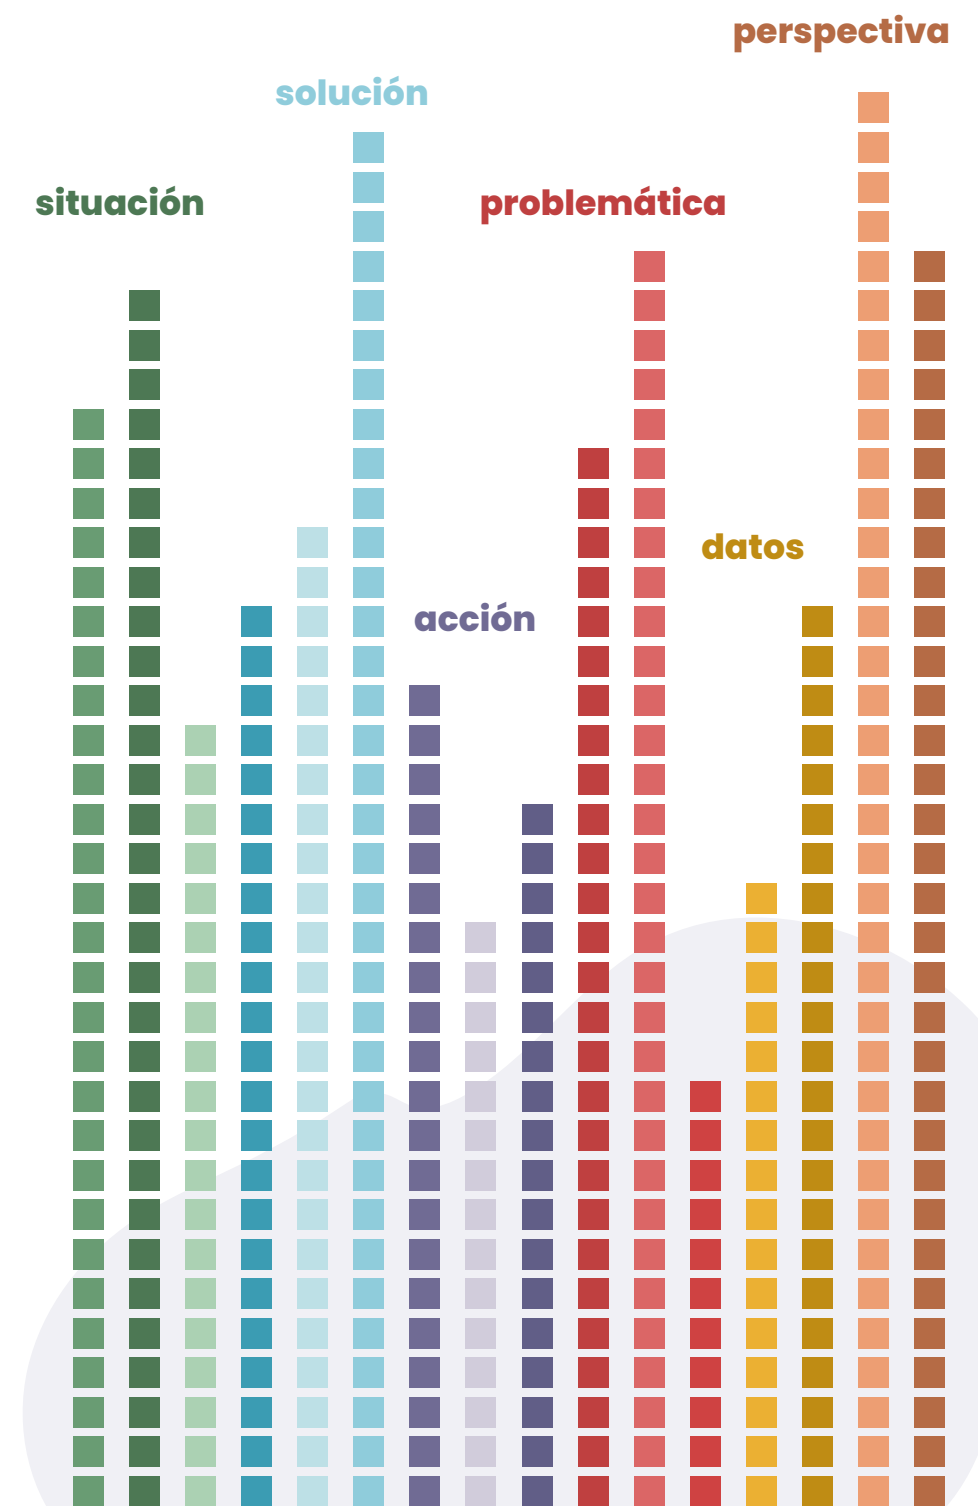

## Recomendaciones generales para el análisis de datos de Twitter

Decidir si es apropiado usar datos de Twitter u otras plataformas sociales depende de 1) el problema que los profesionales pretenden examinar, 2) cómo planean usar los datos y 3) las condiciones de las comunidades examinadas.

### Recomendaciones para decidir que problemas son apropiados para examinar utilizando datos de Twitter

Si bien es posible buscar cualquier cantidad de palabras clave para averiguar sobre diferentes temas en Twitter, los problemas con las siguientes características son más adecuados para ser examinados utilizando datos de Twitter.

- Crisis locales en curso que afectan al grueso de la población
- Situaciones en las que los ciudadanos solicitan cambios al gobierno o a cualquier otra autoridad porque están insatisfechos con las condiciones sociales o económicas y las decisiones políticas.
- Desastres naturales, crisis provocadas por el hombre, como guerras y ataques terroristas, y crisis de enfermedades: las plataformas de redes sociales se han convertido en una parte rutinaria de la respuesta a la crisis y una infraestructura formalizada para diversas tareas, como recopilar relatos de testigos, monitorear los medios y proporcionar actualizaciones durante las respuestas a la crisis.
- Crisis relacionadas con violaciones de derechos humanos.

Los problemas que no son aptos para ser examinados con datos de Twitter son aquellos problemas sociales considerados sistémicos como la pobreza, la corrupción o el desempleo. Se recomienda evitar el análisis de este tipo de temas porque el discurso y los datos en Twitter reflejan principalmente tendencias y situaciones en curso en lugar de prácticas normalizadas en un contexto específico. Además de que este tipo de problemas suelen ser en extremo complejos y son el resultado de múltiples factores, lo que complica aún más su estudio utilizando datos de Twitter.

La segunda categoría de problemas que no es aconsejable examinar con los datos de Twitter son aquellas situaciones relacionadas con un grupo de población que corresponde a un género, grupo de edad o profesión específica. Debido a la naturaleza de la plataforma, es difícil determinar esas características de las y los usuarios a partir de los datos que comparten en Twitter. Por ejemplo, si el interés es conocer la perspectiva de mujeres adolescentes (de 13 a 19 años) o personas con una profesión específica sobre algún tema, entonces Twitter no será una fuente recomendada.

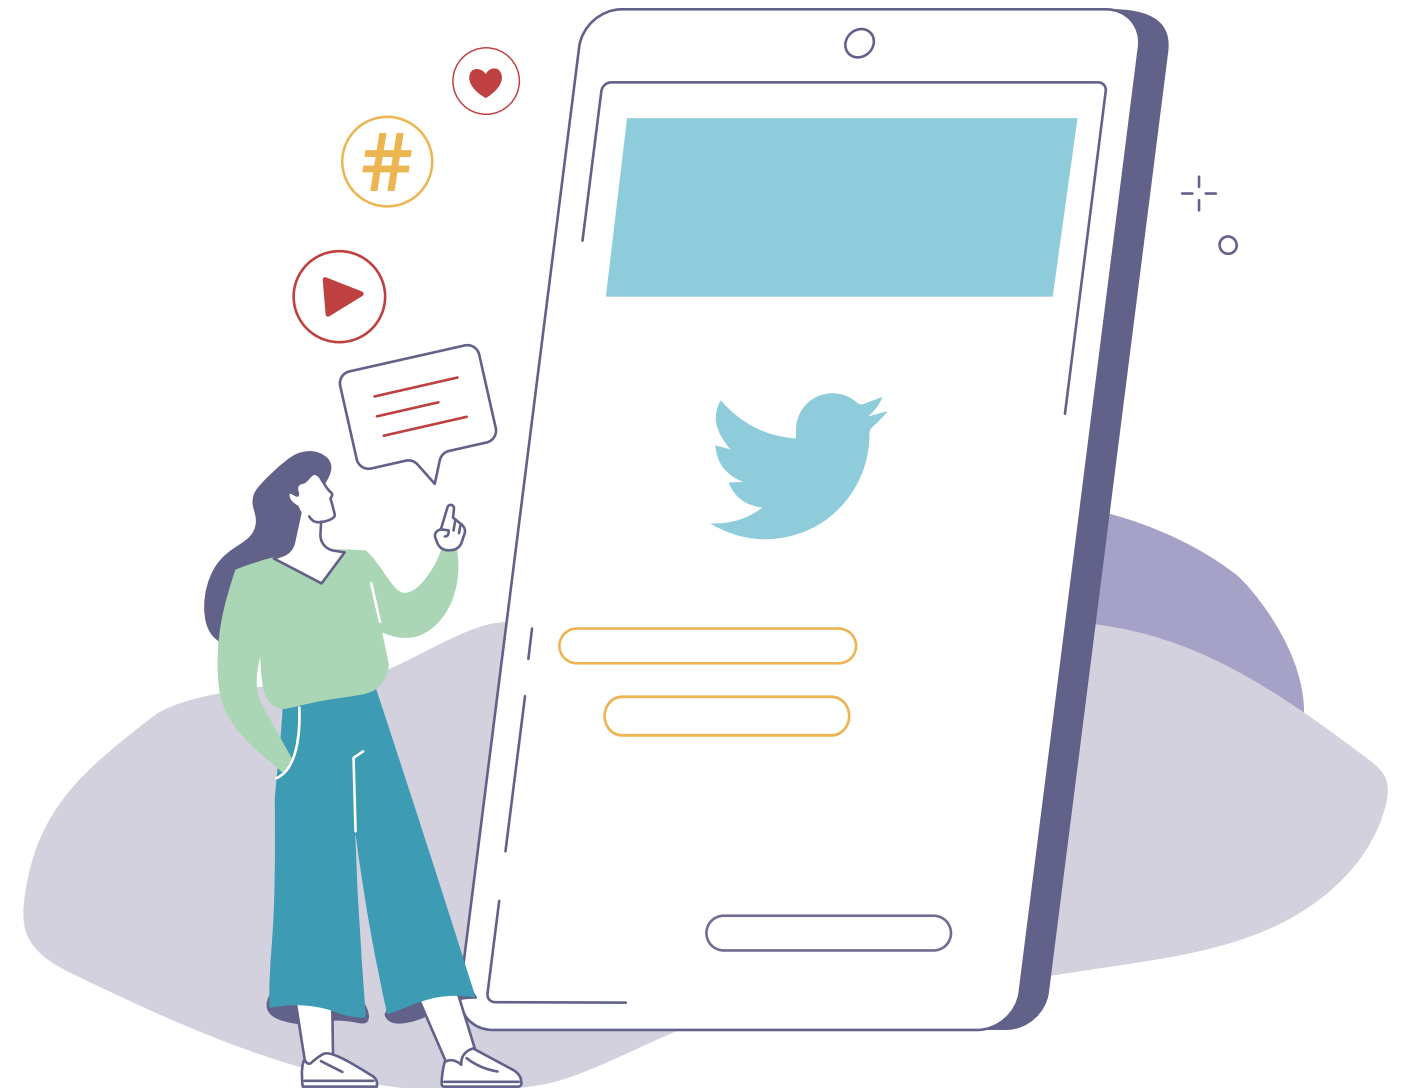

## Recomendaciones generales para el análisis de datos de Twitter

### Sugerencias para definir cómo utilizar los datos de Twitter

Un segundo aspecto para considerar al determinar qué temas son los más apropiados para examinar usando datos de Twitter se relaciona con cómo los profesionales de desarrollo planean usar los hallazgos de sus exploraciones en Twitter, para ello se recomienda reflexionar sobre el tipo de argumentos que pretenden presentar y la evidencia que podrían necesitar para respaldarlos. En este sentido, es imperativo distinguir entre usar la evidencia de Twitter para informar a otras partes interesadas (por ejemplo, la policía y otras organizaciones sin fines de lucro) o informar al equipo dentro de la organización para definir los próximos pasos.

Independientemente de la definición de evidencia, Twitter puede ser una fuente adecuada de información en caso de que los profesionales pretendan comprender y recopilar datos sobre los aspectos de cualquier comunidad que se incluyan en las siguientes categorías:

**Experiencias y estrategias de las personas durante las crisis:** Comprender con mayor detalle cómo las comunidades experimentan, reaccionan y resuelven los problemas locales.

**Actores involucrados:** Identificar actores y actores que contribuyan a la resolución de crisis locales que no fueron identificados previamente.

**Discurso:** Aprender sobre las múltiples opiniones y experiencias de una crisis en curso o pasada, e identificar las perspectivas de las comunidades que a menudo no se consideran.

Por el contrario, no se recomienda utilizar los datos de Twitter si el fin último es alguno de los siguientes:

**1. Cuantificar las condiciones sociales, culturales, económicas o políticas de una población:** Twitter no debe utilizarse como única fuente de información para cuantificar fenómenos sociales. Como se explicó anteriormente, debido al formato de los datos de Twitter, siempre están incompletos y nunca son exhaustivos de las experiencias de las personas.

**2. Responder inquietudes exactas de una población determinada:** como ya se ha mencionado, no se recomienda utilizar únicamente datos de Twitter para recopilar datos de comunidades clasificadas por edad, género, profesión o ubicación.

### Consideraciones sobre las Condiciones de las Comunidades

Un último conjunto de consideraciones que se deben hacer al decidir los temas a analizar usando Twitter está relacionado con las condiciones de las comunidades examinadas con respecto a su calidad de acceso a Internet, acceso a teléfonos inteligentes y sus preferencias de plataformas de redes sociales. Considerar estos tres aspectos es fundamental ya que determinan quién accede a Twitter, su frecuencia e incluso sus habilidades para organizarse utilizando tecnologías digitales. Si bien cumplir con estas condiciones es muy deseable, si no se cumplen es posible examinar los datos de Twitter siempre y cuando se tomen las medidas necesarias para contrarrestar los posibles sesgos que el limitado acceso a internet y teléfonos inteligentes pueda imponer a las comunidades estudiadas.

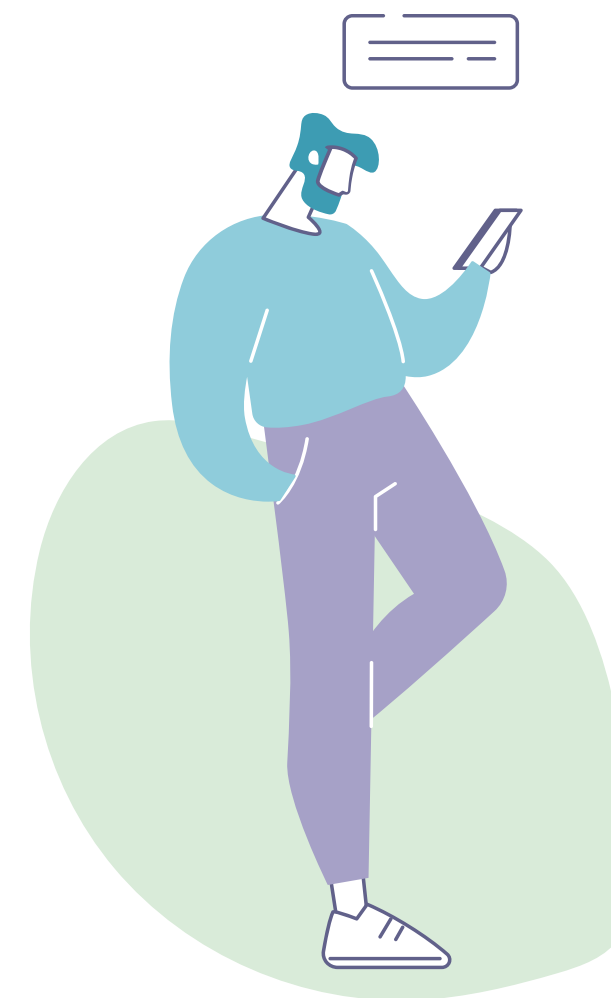

# 04 HERRAMIENTAS

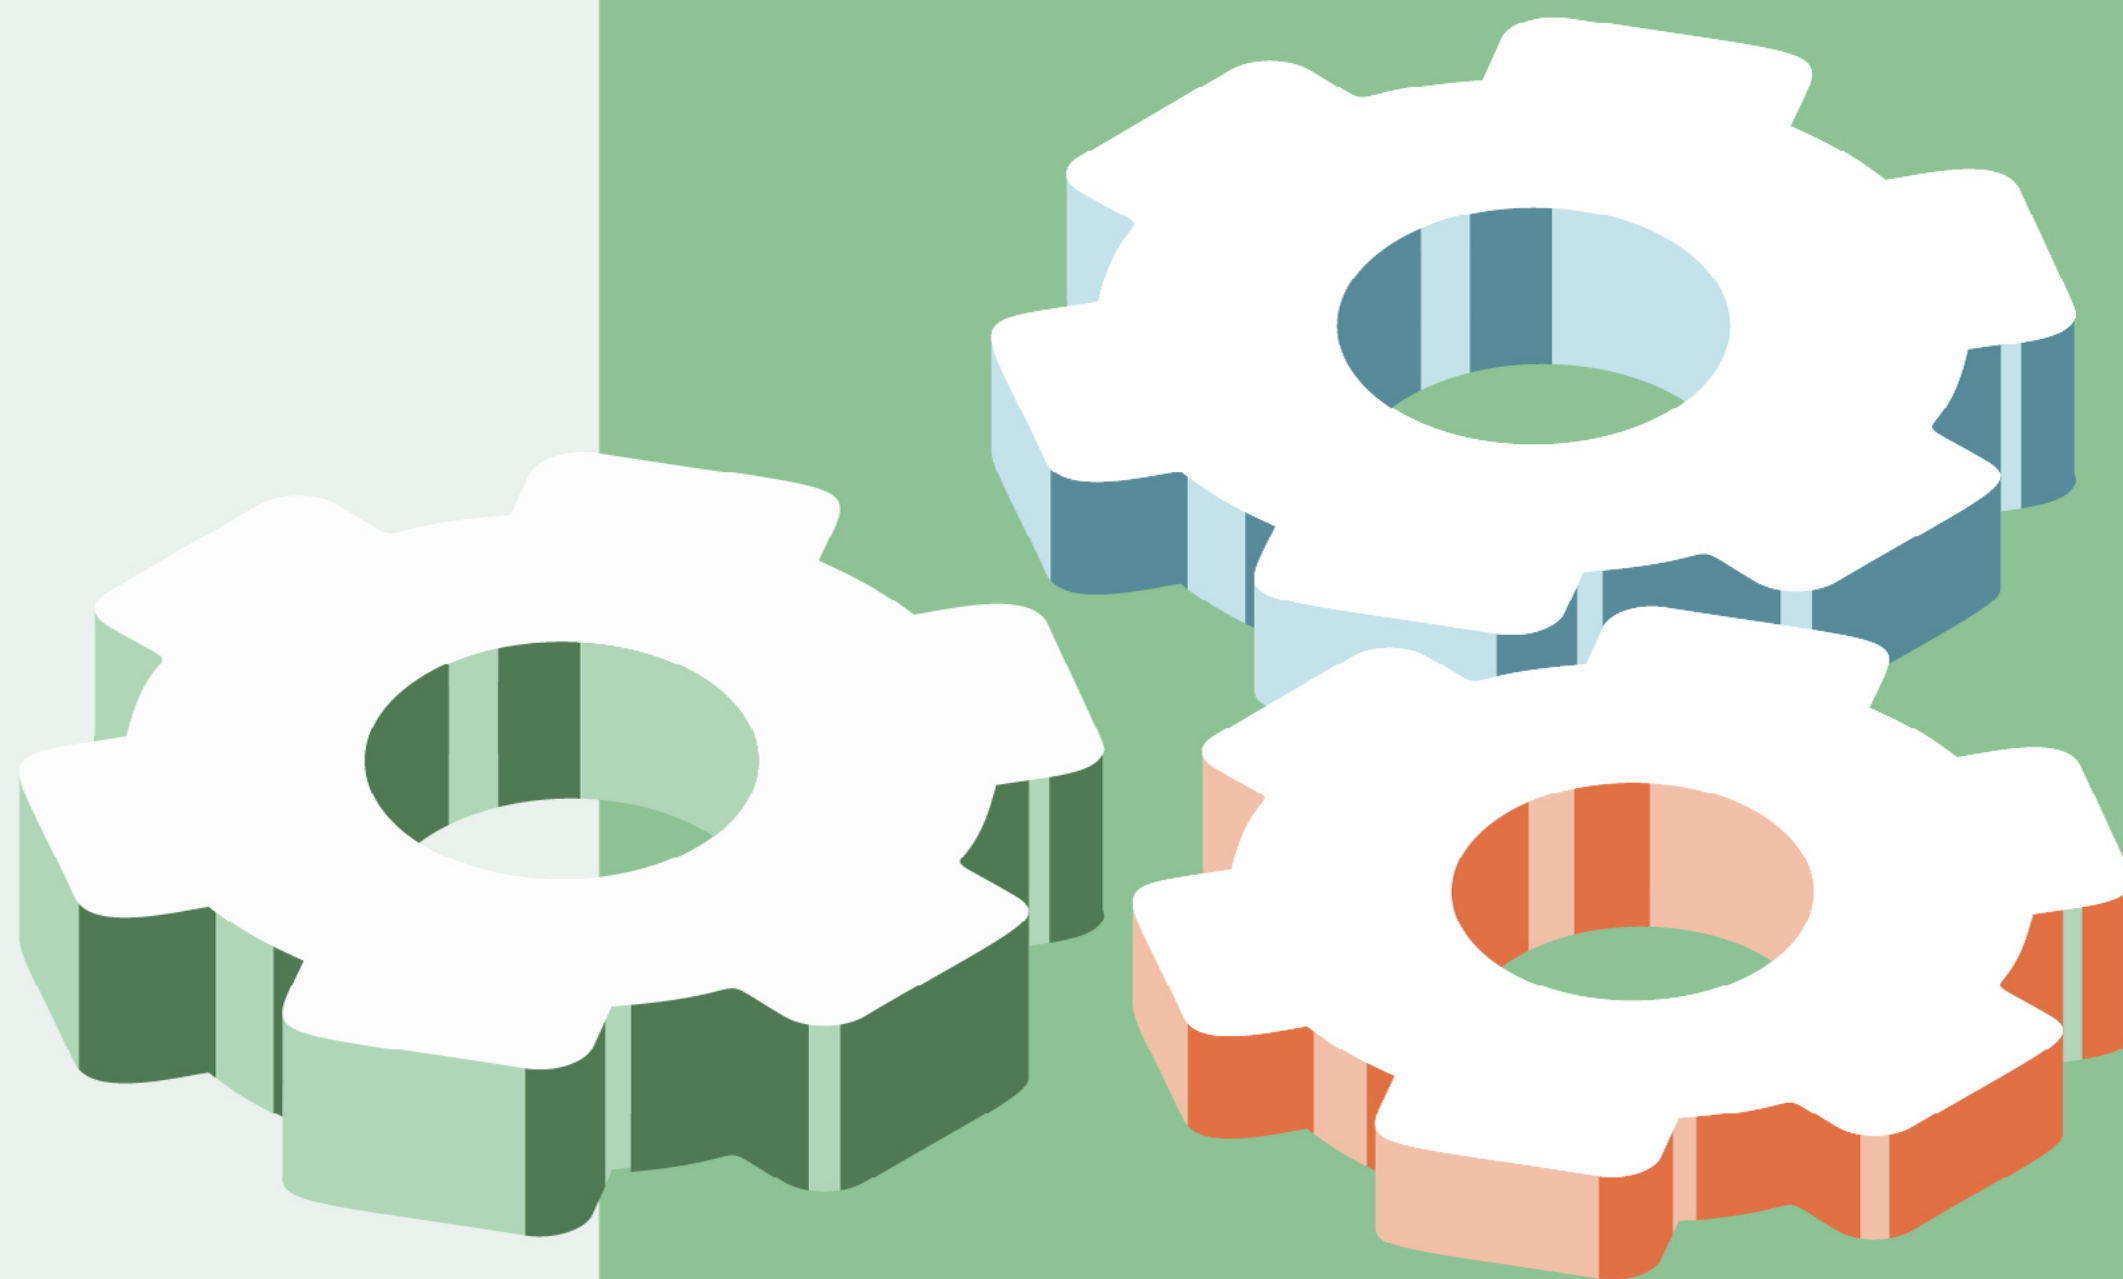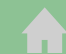

# HERRAMIENTAS

## HERRAMIENTAS COMPUTACIONALES

Modulo 1:  
Herramienta para búsqueda exploratoria y recolección de datos

Modulo 2:  
Herramienta para el análisis de datos

## HERRAMIENTAS CUALITATIVAS

- Diagrama de afinidad
- Plantilla de definición del problema
- Plantilla para documentación de palabras clave
- Plantilla para documentación de búsquedas exploratorias
- Plantilla de documentación de hallazgos y observaciones
- Plantilla de documentación de siguientes pasos



# Herramientas Computacionales

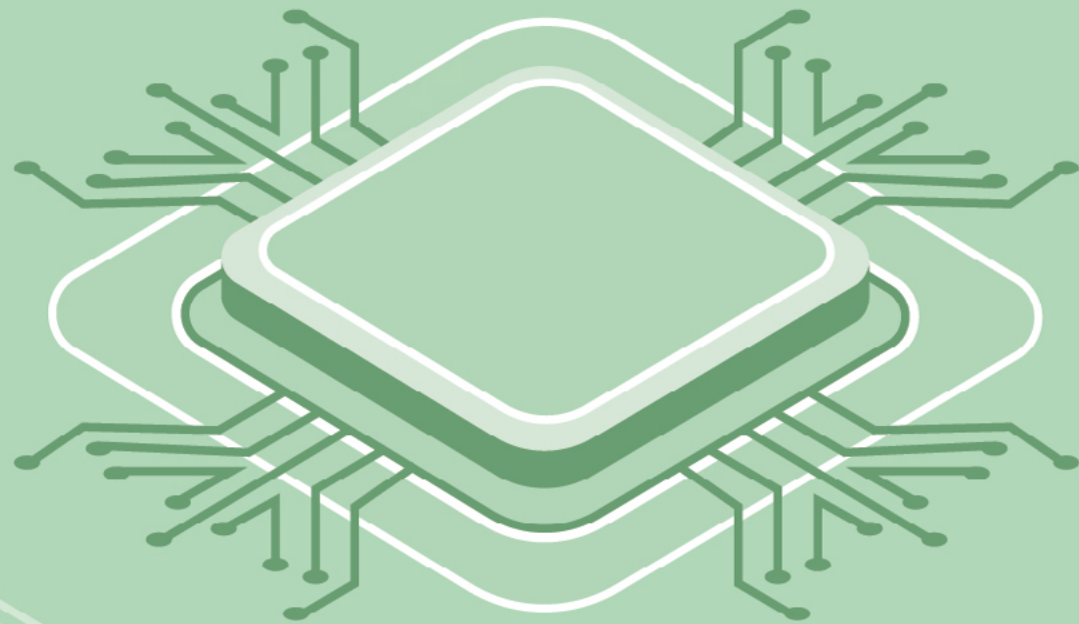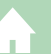

# HERRAMIENTAS COMPUTACIONALES

A green rectangular graphic with a white outline of a cube in the center. The text 'MÓDULO 1' is written in white, bold, uppercase letters across the middle of the cube.

## MÓDULO 1

### Herramienta para buscar y descargar tuits

En este módulo se incluye una herramienta que le permitirá al usuario hacer una búsqueda exploratoria en Twitter para examinar el tipo de contenido asociado con el tema que le interese examinar, así como descargar un determinado número de tuits.

A blue rectangular graphic with a white outline of a cube in the center. The text 'MÓDULO 2' is written in white, bold, uppercase letters across the middle of the cube.

## MÓDULO 2

### Herramienta para el análisis de datos

Este módulo contiene una herramienta de procesamiento de lenguaje natural (NPL por sus siglas en inglés) que facilita el análisis de una enorme cantidad de tuits de forma inmediata, reduciendo así la sobrecarga de examinar tuits manualmente.

El propósito de la herramienta es filtrar tuits e identificar aquellos con contenido similar al problema que se está examinando.

Antes de usar este módulo te recomendamos visitar el módulo 1 para generar correctamente los insumos requeridos para utilizar esta herramienta.

## Módulo 1

### Descripción de la herramienta

El objetivo de esta herramienta es facilitar la exploración inicial de datos en Twitter y su recolección.

La interfaz permite realizar búsquedas de datos de tuits con los siguientes criterios:

**1. Contenido del tuit:** En esta sección, puedes definir palabras clave y hashtags para filtrar la búsqueda de contenido.

- Evita utilizar frases y el uso de comillas (" ")
- Es posible realizar búsquedas con múltiples palabras, para ello solo es necesario separarlas por comas.
- También es posible definir palabras que deseas omitir en la búsqueda de datos. Te recomendamos utilizar este filtro para obtener una búsqueda más precisa

**2. Cuenta de Twitter:** Esta opción te permite filtrar los tuits por usuarios específicos de Twitter

**3. Localización:** Este control te permite definir la ubicación específica de los tuits que deseas examinar. Es posible filtrar la búsqueda por país, estado, o incluso alcaldía.

- Este control te permite definir la ubicación específica de los tuits que deseas recolectar.
- Recuerda que es posible filtrar la búsqueda por país, estado, o incluso alcaldía.

**4. Fechas:** Este control te permite definir el periodo de tiempo del cual deseas recolectar datos.

- Utiliza la opción de calendario para definir el periodo de tiempo del cual deseas buscar datos. Es posible buscar y recopilar datos desde marzo del 2006.
- Te recomendamos buscar y guardar datos correspondientes a distintos periodos de tiempo para comparar e identificar cambios en el discurso sobre un mismo tema.

**5. Número de tuits:** Esta opción te permite fijar el número máximo de tuits que se mostrarán en pantalla y que podrás descargar.

- Es posible desplegar de 1 a 500 tuits por búsqueda dependiendo del tipo de usuario

**6. Idioma:** Por default el idioma de los tuits está predefinido al español

**Propiedades de la búsqueda**

Palabras Clave, hashtags

Omitir palabras clave, hashtags

Usuario

Estados

Fecha Inicial

Fecha Final

Número de Tweets por página: 10

**Buscar**

Guardar

**Guardar**

Historial de eventos



## Módulo 1

### Descripción de la herramienta

Una vez realizada la búsqueda con la herramienta del módulo 1, los resultados se desplegarán en la pantalla y al hacer clic en el botón de guardar, los datos se salvarán en un archivo .CSV con el nombre deseado.

La interfaz permite además seleccionar los tuits que desean obtenerse, en caso de no necesitar todos los tuits resultantes de la búsqueda. Los datos de Twitter que se descarguen pueden ser analizados con la herramienta del módulo dos.

Por último, al descargar los tuits se incluye la siguiente información:

Como recordatorio, el archivo de tuits generado por la herramienta del módulo 1 incluye los siguientes campos:

**1. username:** Nombre de usuario de la cuenta de Twitter

**2. text:** Contenido del tuit

**3. created\_at:** Fecha y hora de creación del tuit.  
El formato de la fecha es: año - mes - día

**4. link:** URL del tuit

**5. place\_full\_name:** Si está disponible nombre del estado, ciudad, o alcaldía.

**6. place\_name:** Nombre del lugar

**7. place\_type:** Especifica el tipo particular del lugar como el nombre de una ciudad o un punto de interés.

**8. country:** Nombre del país

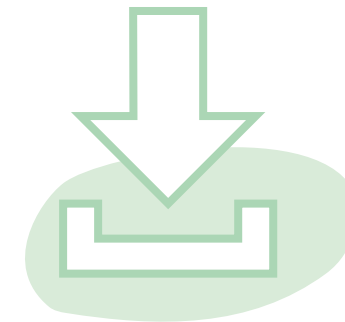

|   | A             | B                                                                                                                         | C                         | D                                                                                                           | E                              | F            | G          | H      |
|---|---------------|---------------------------------------------------------------------------------------------------------------------------|---------------------------|-------------------------------------------------------------------------------------------------------------|--------------------------------|--------------|------------|--------|
| 1 | username      | text                                                                                                                      | created_at                | link                                                                                                        | place_full_name                | place_name   | place_type | contry |
| 2 | ellaesadriana | Dolor sit amet, consectetur adipiscing elit, sed diam nonummy nibh euismod tincidunt ut laoreet dolore magna aliquam erat | 2022-01-10 21:00:53+00:00 | <a href="https://twitter.com/twipsum/status/13007058604">https://twitter.com/twipsum/status/13007058604</a> | Azcapotzalco, Distrito Federal | Azcapotzalco | city       | México |

Encabezados del archivo de tuits

## Módulo 2

### Descripción de la herramienta

El propósito de esta herramienta es filtrar tuits e identificar aquellos con contenido similar al problema que se está examinando. Para utilizar esta herramienta se requiere de dos archivos:

**Archivo 1:** Un archivo que contenga tuits

**Archivo 2:** Un conjunto de enunciados que describen el problema que se está investigando

En términos prácticos, la herramienta evalúa la similitud de los tuits con los enunciados con los que se alimenta, dando como resultado aquellos tuits que son semánticamente similares a los enunciados dados.

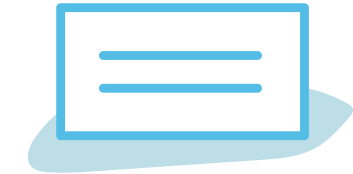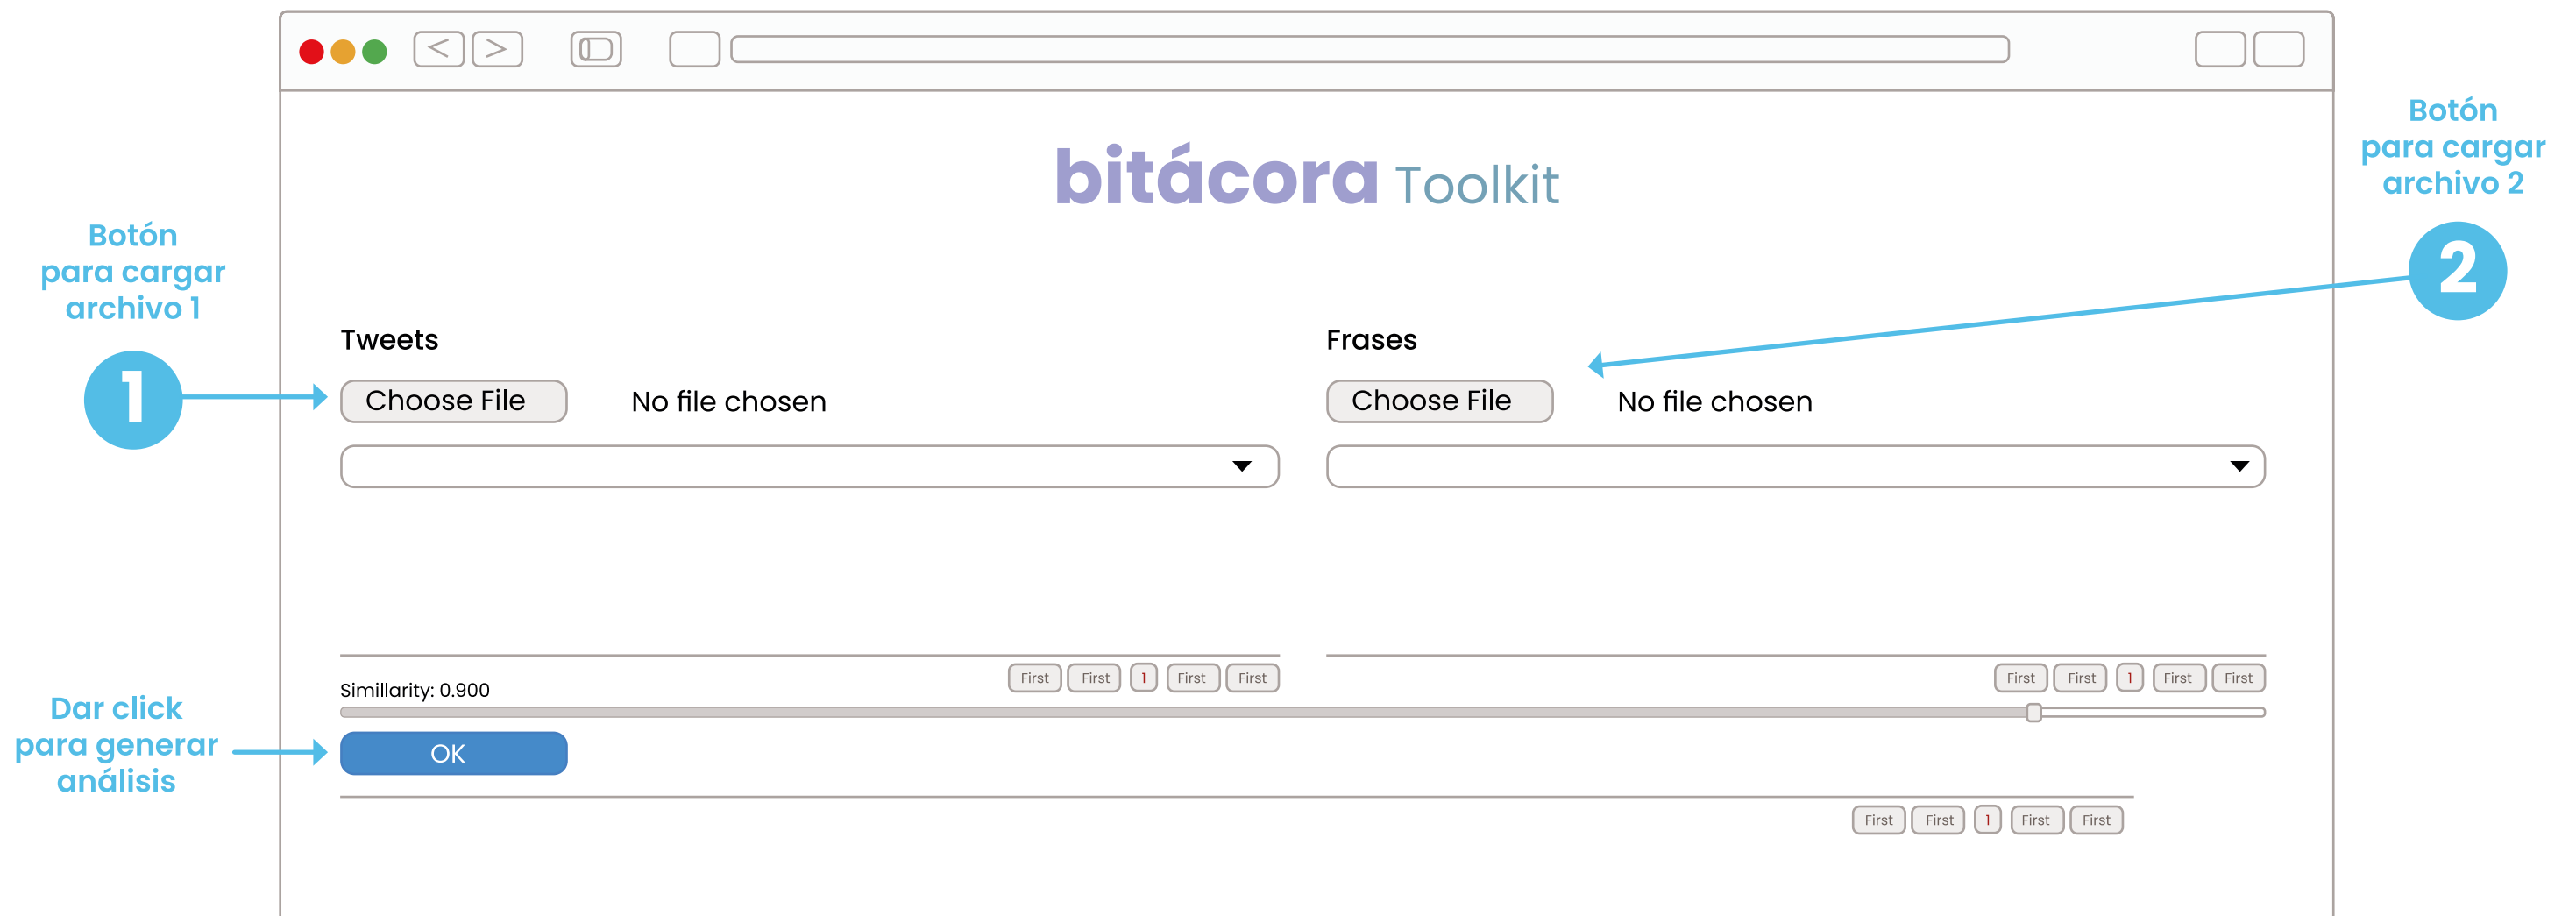

Imagen de la interfaz

## Módulo 2

### Descripción de la herramienta

Este módulo contiene una herramienta de procesamiento de lenguaje natural (NPL por sus siglas en inglés) que facilita el análisis de una enorme cantidad de tuits de forma inmediata, reduciendo así la sobrecarga de examinar tuits manualmente.

Esta herramienta utiliza el algoritmo word2vec, el cual consiste primero en codificar texto como vector para después examinar el significado semántico del texto y hacer comparaciones vectoriales para identificar similitudes. La herramienta utiliza el modelo Spanish Billion Word Corpus and Embeddings (SBWCE) que consta de casi 1.500 millones de palabras semánticamente relacionadas en español, lo que a su vez nos informa del contexto de las palabras.

En esta sección del manual se describe el proceso para utilizar la herramienta para el análisis de datos.

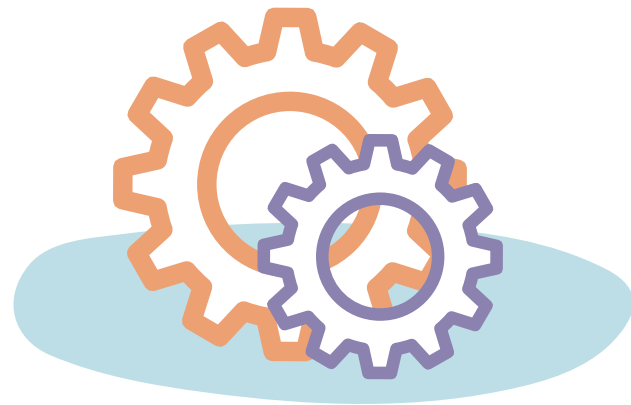

### Pasos

**1**

Revisión del archivo de tuits  
previamente recolectados  
(archivo 1)

**2**

Preparación de lista de  
frases que caracterizan el  
problema a examinar  
(archivo 2)

**3**

Análisis utilizando  
la herramienta

## Módulo 2

### Revisión del archivo de tuits

Para utilizar la herramienta del módulo 2, además de la lista de frases, es necesario tener un conjunto de datos de tweets del que la herramienta extraerá aquellos que sean semánticamente similares a las frases.

Por lo tanto, una vez generada la lista de frases, el siguiente paso es asegurarse de generar un archivo de tuits utilizando el módulo anterior. Idealmente, los tuits deben corresponder al período de tiempo que se está examinando, y el archivo debe generarse con base a las palabras clave, cuentas de Twitter, y ubicación geográfica que reflejen el tema a examinarse.

Como recordatorio, el archivo de tuits generado por la herramienta del módulo 1 incluye los siguientes campos:

**1. username:** Nombre de usuario de la cuenta de Twitter

**2. text:** Contenido del tuit

**3. created\_at:** Fecha y hora de creación del tuit.  
El formato de la fecha es: año - mes - día

**4. link:** URL del tuit

**5. place\_full\_name:** Si está disponible nombre del estado, ciudad, o alcaldía.

**6. place\_name:** Nombre del lugar

**7. place\_type:** Especifica el tipo particular del lugar como el nombre de una ciudad o un punto de interés.

**8. country:** Nombre del país

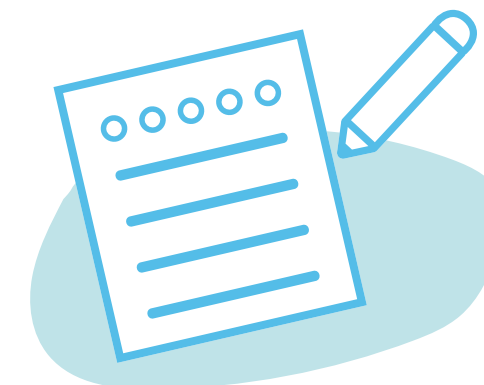

|   | A             | B                                                                                                                         | C                         | D                                                                                                           | E                              | F            | G          | H      |
|---|---------------|---------------------------------------------------------------------------------------------------------------------------|---------------------------|-------------------------------------------------------------------------------------------------------------|--------------------------------|--------------|------------|--------|
| 1 | username      | text                                                                                                                      | created_at                | link                                                                                                        | place_full_name                | place_name   | place_type | contry |
| 2 | ellaesadriana | Dolor sit amet, consectetur adipiscing elit, sed diam nonummy nibh euismod tincidunt ut laoreet dolore magna aliquam erat | 2022-01-10 21:00:53+00:00 | <a href="https://twitter.com/twipsum/status/13007058604">https://twitter.com/twipsum/status/13007058604</a> | Azcapotzalco, Distrito Federal | Azcapotzalco | city       | México |

Encabezados del archivo de tuits

## Módulo 2

### Preparación de lista de frases

#### ¿Qué es la lista de frases?

El primer paso consiste en armar una lista de frases que caractericen el problema. Estas frases pueden ser extractos de tuits que ilustren múltiples discursos desde distintos ángulos y perspectivas de los actores y organizaciones involucradas del tema a examinar. Alternativamente, las frases pueden ser también extractos de entrevistas, diálogos, respuestas a encuestas, o de cualquier otra fuente. Independientemente de su origen, lo importante es recolectar contenido que refleje el tema que se desea investigar en Twitter, y en la medida de lo posible desde distintas perspectivas.

#### ¿Como hacer la lista de frases?

A continuación se enlistan una serie de recomendaciones para generar las frases que la herramienta del módulo 2 utilizara:

- Generar oraciones completas (sujeto, verbo, predicado) y cortas
- Elimina preposiciones, y detalles o referencias a otros contextos o tópicos • Evita oraciones largas
- Las frases deben incluir contenido del tema a examinar

#### Si extraes frases de tuits te sugerimos:

- Extraer el texto del tuit y transformarlo en oraciones completas
- Cuando el tuit incluya una mención, por ejemplo, @Alc\_Iztapalapa, sugerimos extraer el nombre propio, en este caso "Iztapalapa".
- Evita copiar y pegar los tuits, procura siempre limpiar el texto y asegurarte de que las frases estén completas y coherentes.
- Omite las oraciones o expresiones que no tengan ningún contenido relacionado con el tema a investigar.

### Formato del archivo

- La lista de frases debe estar en una columna (como se muestra en la imagen) y el título de la columna debe ser "text".
- La lista debe guardarse en formato .CSV

|    | A                                                                      |
|----|------------------------------------------------------------------------|
| 1  | text                                                                   |
| 2  | Acerca la venta de frutas y verduras a distintas colonias              |
| 3  | Venta de frutas y verduras a precio solidario                          |
| 4  | Alimentos para quien perdio su empleo a causa del covid 19             |
| 5  | Aportan a la sociedad con entregas a domicilio                         |
| 6  | Apoya a familiares                                                     |
| 7  | Apoyo a los agricultores por medio de la compra justa de sus productos |
| 8  | Ayuda a los adultos mayores sin costo                                  |
| 9  | Ayuda a trabajadoras sexuales                                          |
| 10 | Ayuda a usuarios de drogas                                             |
| 11 | Ayudan a la gente que trabaja en la calle sin sueldo fijo              |
| 12 | Ayudan a la sociedad para que los vecinos no salgan                    |
| 13 | Ayudan con entregas a domicilio para que los adultos mayores no salgan |
| 14 | Ayudan pagando un alimento extra                                       |
| 15 | Ayudar a productores y comerciantes de hortalizas                      |
| 16 | Ayudar a personas violentadas en sus hogares                           |
| 17 | Brinda alimentos a comunidad LGBTTI                                    |
| 18 | Brinda alimentos a trabajadores de salud de manera gratuita            |
| 19 | Brinda tarjetas con saldo                                              |
| 20 | Proporcionan vales                                                     |

Ejemplo del formato del archivo de la lista de las frases

## Módulo 2

### Preparación de lista de frases

#### ¿Como hacer la lista de frases?

Algunos ejemplos de cómo transformamos texto de distintas fuentes en frases listas para ser utilizadas con la herramienta del módulo 2:

| Fuente                                                                                       | Texto Original                                                                                                                                                                                                                                                                                                                                                                                                                                                                                                                                                                                       | Texto Limpio                                                                                                                                                        |
|----------------------------------------------------------------------------------------------|------------------------------------------------------------------------------------------------------------------------------------------------------------------------------------------------------------------------------------------------------------------------------------------------------------------------------------------------------------------------------------------------------------------------------------------------------------------------------------------------------------------------------------------------------------------------------------------------------|---------------------------------------------------------------------------------------------------------------------------------------------------------------------|
|  Twitter    | <p>Alrededor de unos 60 ejidatarios del pueblo de San Gregorio, en Xochimilco, se unieron para entregar sus productos al domicilio de quien lo solicite en la #CDMX. Aquí encontrarás el número para realizar pedidos:</p>                                                                                                                                                                                                                                                                                                                                                                           | <p>Ejidatarios de San Gregorio, Xochimilco entregan productos a domicilio.</p>                                                                                      |
|  Twitter   | <p>De la chinampa es un grupo de agricultores de Xochimilco que comercializa sus productos vía online, actualmente siguen distribuyendo sus productos, checa las fechas de entrega.</p>                                                                                                                                                                                                                                                                                                                                                                                                              | <p>Agricultores comercializan productos vía online</p>                                                                                                              |
|  Encuesta | <p>Esta iniciativa consiste en que se entregan 250 comidas gratuitas al día, cocinadas cada día por un chef diferente, a pacientes y sus familiares que reciben tratamiento en el Hospital Centro Médico Siglo XXI. Las comidas son también entregadas a personal médico del Instituto Nacional de Ciencias Médicas y de Nutrición y del Instituto Nacional de Enfermedades Respiratorias. El objetivo de la campaña es poder continuar con el apoyo a los agricultores por medio de la compra justa de sus productos y con la entrega de las comidas a pacientes, familiares y personal médico.</p> | <ul style="list-style-type: none"> <li>• Entrega de comidas gratuitas a pacientes y personal médico.</li> <li>• Apoyo a agricultores con la compra justa</li> </ul> |
|  Encuesta | <p>Reparte despensas a la población vulnerable en la alcaldía de Xochimilco, así mismo a través de una alianza con la Plataforma México vs COVID inició el proyecto de Comedores Comunitarios donde reparten alrededor de 120 comidas diarias en la zona chinampera de la delegación.</p>                                                                                                                                                                                                                                                                                                            | <ul style="list-style-type: none"> <li>• Reparte despensas a la población vulnerable</li> <li>• Comedores comunitarios reparten comidas</li> </ul>                  |



## Módulo 2

### Análisis utilizando la herramienta

1. Una vez generados el archivo de la lista de frases y el archivo de tuits, ambos archivos se cargan en la herramienta del módulo 2.
2. Después con la barra de similarity, se determina el nivel de similitud que se busca entre los tuits y las frases. Los valores de similitud de la herramienta van de 0 (sin similitud) hasta 1 (mayor similitud).
3. Por ultimo, se da click en OK y la herramienta inicia el análisis.
4. Como resultado, la herramienta despliega aquellos tuits que son similares a las frases del archivo cargado.

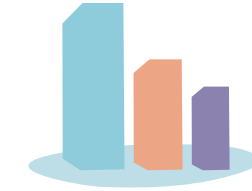

**bitácora Toolkit**

**Tweets** *Cargar el archivo de tuits del módulo 1*

Choose File *iztacalco\_tuits.csv*

*iztacalco\_tuits.csv*

clean\_text

claudiashein.profeco.prosoccdmx.iztacalcoal.iztacalconews.por.favor.ayuda.a.todos.lo.que.vivimos.en.iztacalco.no.es.posible.que.abusen.así.de.todos.nc  
traviesos77.nosotros.también.somos.de.iztacalco

mejor.el.señor.de.los.cielos.enfermo.sabe.que.tiene.que.usar.tapabocas.que.ustedes.con.gripe.pónganse.las.pilas.sarcasmo.en.san.miguel.iztacalco.http  
23.06.precauciónvial.por.choque.en.av.río.churubusco.a.la.altura.de.oriente.102.con.dirección.al.sur.col.gabriel.ramos.millán.alcaldía.iztacalco.https.t.co.v  
presentación.del.programa.mercomuna.para.entregar.vales.quincenales.que.serán.canjeables.en.pequeños.negocios.implementado.para.contribuir.y.tral  
04.36.precauciónvial.choque.en.eje.3.sur.a.la.altura.de.calle.avena.colonia.granjas.méxico.alcaldía.iztacalco.servicios.de.emergencia.laboran.en.el.lugar  
primer.fruto.de.la.cuarentena.gracias.a.mis.queridos.maestros.lourdes.de.los.reyes.y.alejandro.bernardo.díaz.hylt.haola.sembradoresdeqj.en.santiago.izt  
profeco.ayuda.profeco.en.el.mercado.de.la.juventino.rosas.en.la.delegación.iztacalco.están.subiendo.los.precios.carne.huevo.quesos.son.los.más.elevat

First Prev 1 2 Next Last

**Frases** *Cargar el archivo de las frases*

Choose File *Frases\_Correcto.csv*

*Frases\_Correcto.csv*

clean\_text

acerca.la.venta.de.frutas.y.verduras.a.distintas.colonias  
venta.de.frutas.y.verduras.a.precio.solidario  
dan.atención.a.familias.que.se.quedaron.sin.empleo.a.causa.del.covid  
alimentos.para.quien.perdió.su.empleo.a.causa.del.covid.19  
aportan.a.la.sociedad.con.entregas.a.domicilio  
apoya.a.familiares  
apoyo.a.los.agricultores.por.medio.de.la.compra.justa.de.sus.productos  
apoyo.con.la.entrega.de.las.comidas.a.pacientes.familiares.y.personal.médico  
anovo.económico.a.familias.de.escasos.recursos.debido.a.falta.de.trabajo.o.por.muerte.del.proveedor.económico.del.hogar

First Prev 1 2 Next Last

Similarity: 0.900

0.900 *Definir el grado de similitud*

OK

| created_at                | username        | text                                                                                                                                                                                                                                              |
|---------------------------|-----------------|---------------------------------------------------------------------------------------------------------------------------------------------------------------------------------------------------------------------------------------------------|
| 2020-04-04 00:05:34+00:00 | ConcejalNavalZT | El día de ayer visitamos a los #locatarios del #mercado #Pantitlán de #calle4 en #Iztacalco para conocer las #medidas que están tomando ante la #contingencia del #COVID_19 en la #CiudaddeMéxico. Los invitamos a realizar sus #compras          |
| 2020-04-04 04:48:26+00:00 | ConcejalNavalZT | Les compartimos el #directorio de los locatarios del #mercado #Pantitlán calle 4 en #Iztacalco, quienes nos ayudaron con la información y que se sumaron a la iniciativa de brindar #ServicioADomicilio como parte de las medidas ante el #COV    |
| 2020-04-05 15:26:30+00:00 | ROBERTOMURMOR   | @GobCDMX @SSP_CDMX Aquí en iztacalco agrícola oriental N nunca han pasado y muchas personas andan como si nada por las calles, sobre todo los chavos en motoneta y los borrachos de esquina.                                                      |
| 2020-04-08 16:00:01+00:00 | erickvalencia18 | @IztacalcoAl esta mal que tenga cajas de refresco afuera de mi tienda debajo de la banqueta? De ser cierto por que? De lo ser cierto. Por qué los de una camioneta de la delegación iztacalco se llevaron mis cajas sin decir, solo las tomaron s |
| 2020-04-12 04:35:25+00:00 | aZul2112        | @UCS_GCDMX @OVIACDMX @IztacalcoAl buena noche. A las 10:40pm se bajaron 2 mujeres del taxi a orinar atrás del camión. La cámara del @C5_CDMX que está en la esquina es la 11529. En oriente 108 casi esquina con Sur 115A, Ji                     |
| 2020-04-13 21:11:09+00:00 | iztacalcoinclu  | Presentación del programa #Mercomuna para entregar vales quincenales, que serán canjeables en pequeños negocios, implementado para contribuir y trabajar por la población más vulnerable en la Ciudad de México y la Alcaldía #Iztacalco #        |

*Tuits filtrados*

# Herramientas cualitativas

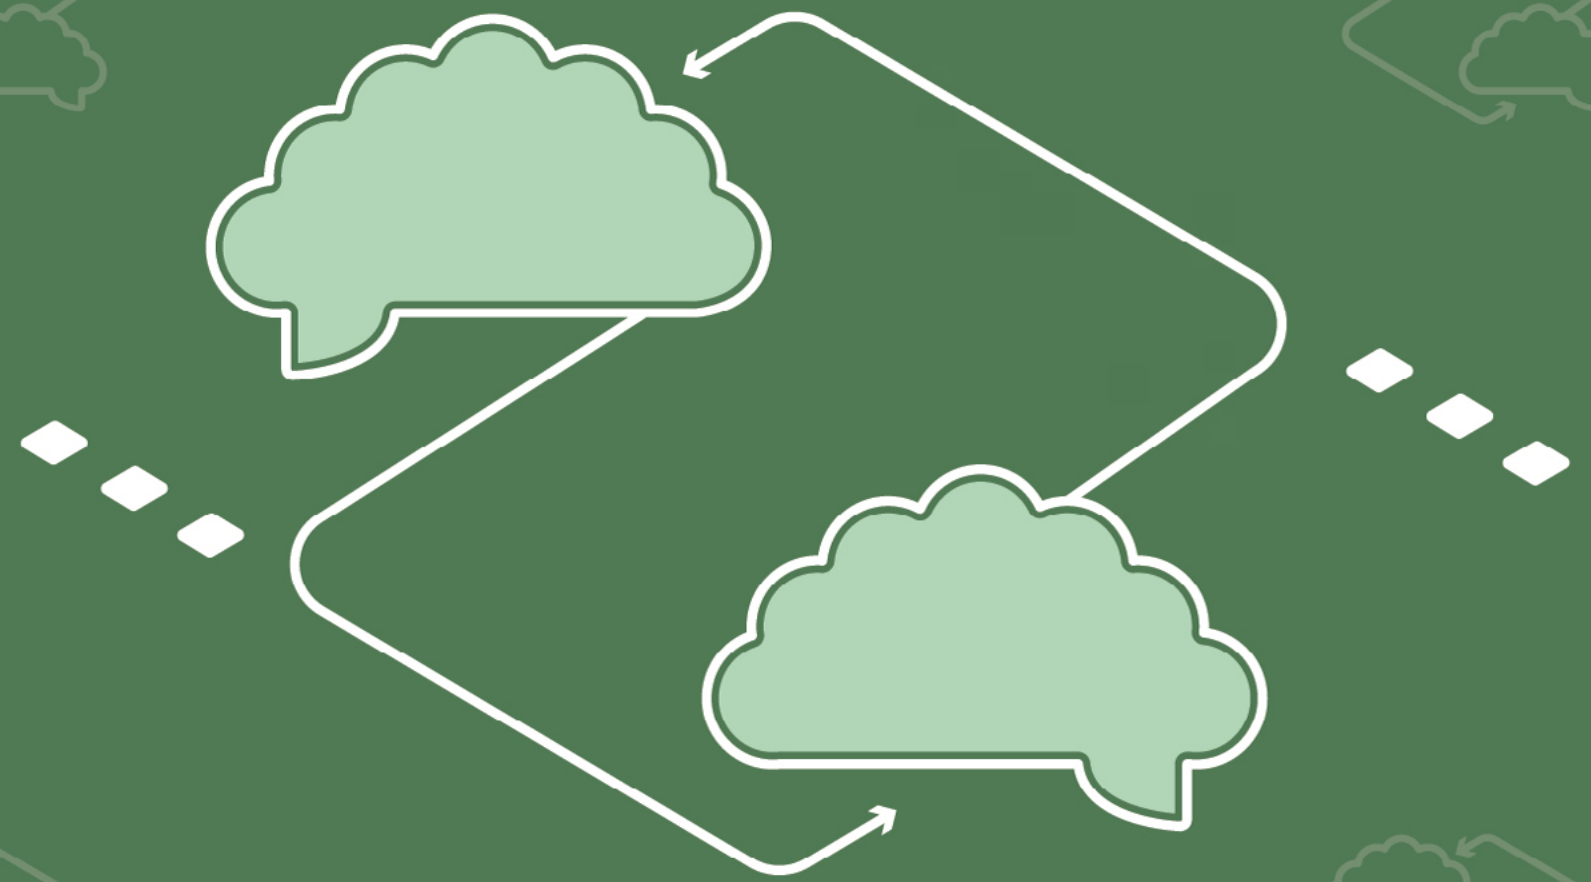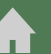

# Herramientas

## Diagrama de afinidad

El diagrama de afinidad es un método que permite agrupar significativamente observaciones, ideas y datos, para identificar patrones y relaciones.

### ¿Cómo utilizar el diagrama?

En el contexto de este manual, el diagrama de afinidad puede ser utilizado para capturar, agrupar y sintetizar las observaciones recopiladas durante la revisión de tuits.

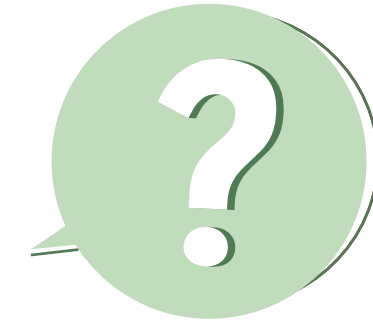

**1. Registro de observaciones:** Antes de utilizar el diagrama de afinidad, registra un promedio de 50 - 100 observaciones de los tuits. Cada observación debe estar en su propia nota y las notas pueden ser:

- Extractos de tweets
- Primeras impresiones sobre el contenido de los tuits, las temáticas de los tuits por ejemplo, necesidades, acciones, problemas, opiniones y perspectivas, la frecuencia con la que se discuten temas, el tipo de comentarios y conversaciones que se generan, etc.
- Observaciones sobre lo que les pareció interesante, lo que les sorprendió, lo que quisieran investigar un poco más
- Nuevos actores y organizaciones

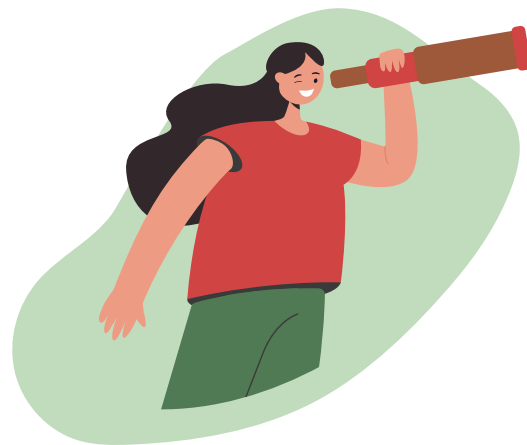

**2. Organización y categorización:** Una vez generadas las notas, el equipo puede comenzar el proceso de organización y categorización buscando patrones y puntos en común. Las notas que comparten una intención, un problema o una cuestión similar se agrupan juntas. En el transcurso de este proceso, el equipo interpretará las notas, y conforme se avance en las rondas de análisis, surgirán patrones. Los patrones se perciben cuando los equipos clasifican los elementos en función de la similitud percibida, definiendo puntos en común que son inherentes pero no necesariamente obvios.

El resultado del diagrama de afinidad debiera ser una consolidación de las observaciones recolectadas que informen arquetipos agregados sintetizados. Idealmente, estos arquetipos o modelos proporcionarían una descripción detallada de las distintas comunidades, perspectivas o particularidades que integran la temática que se está examinando.

Finalmente, recomendamos utilizar los hallazgos y patrones identificados como punto de partida para informar siguientes pasos ya sea utilizando métodos adicionales como son entrevistas o encuestas para ahondar más en los temas que sean de interés.

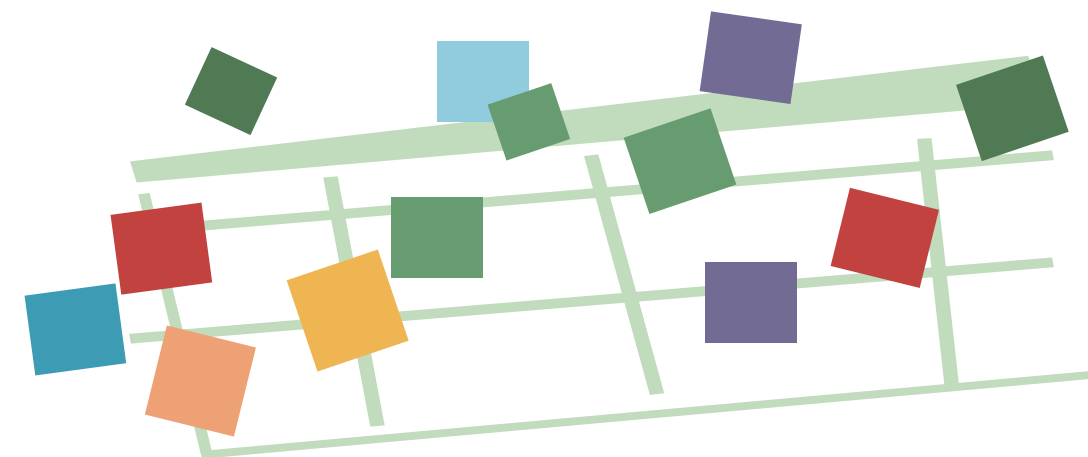

## Diagrama de afinidad

### Nombre de la categoría:

Palabra o frase corta utilizada para referirse a una categoría describiendo un aspecto relevante y general del tema que se está examinando.

### Descripción de la categoría:

Breve texto que describa las principales características de la categoría reveladas por las notas amarillas. Pueden ser categorías de actores u organizaciones que llevan a cabo las acciones observadas y documentadas en las notas amarillas.

### Evidencia asociada con la categoría:

Extractos de tuits u observaciones que ejemplifiquen las categorías. Estas observaciones son los componentes básicos del diagrama de afinidad.

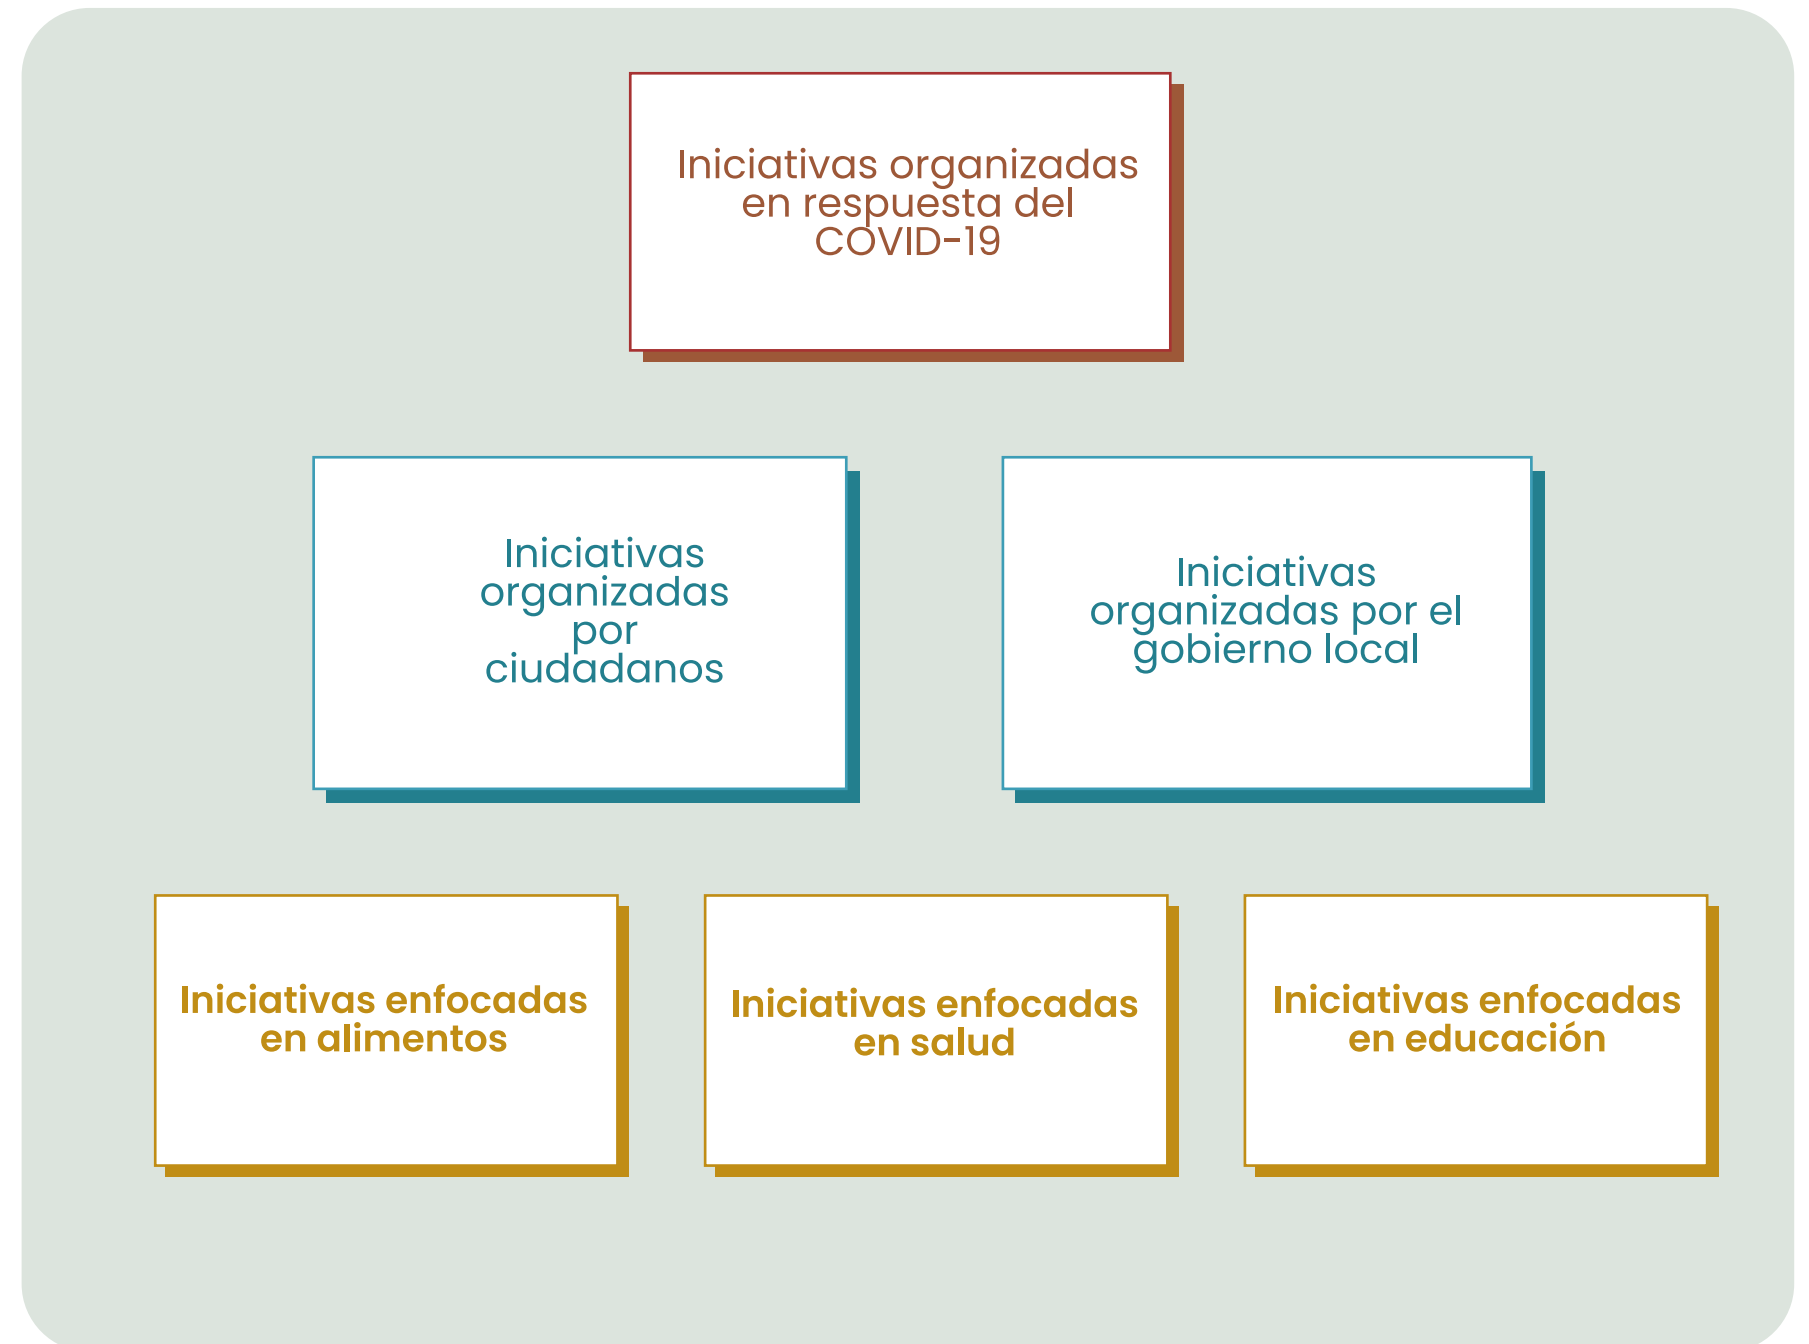

Ejemplo breve de una de las categorizaciones iniciales que hicimos durante el proyecto de inventario social





# Plantilla de definición del problema

Utiliza esta plantilla para definir el problema que se busca informar con ayuda de datos de Twitter.

Nombre del proyecto: \_\_\_\_\_

Fecha: \_\_\_\_\_

|                                                                                                                                                                                                                                 |                                                                                                                                                                  |
|---------------------------------------------------------------------------------------------------------------------------------------------------------------------------------------------------------------------------------|------------------------------------------------------------------------------------------------------------------------------------------------------------------|
| <p><b>Contexto (Lugar y tiempo)</b><br/>¿Dónde se está desarrollando este problema?<br/>¿Es un problema extendido y generalizado o es un problema propio de una zona específica?<br/>¿Cuál es la temporalidad del problema?</p> | <p><b>Comunidades</b><br/>¿Qué grupos están involucrados en el problema?<br/>¿Quiénes son</p>                                                                    |
| <p><b>Evidencia y datos</b><br/>¿Qué evidencia se tiene actualmente sobre el problema?<br/>¿Qué tipo de evidencia se espera encontrar?<br/>¿Con qué tipo de datos cuentas actualmente?</p>                                      | <p><b>Objetivos</b><br/>¿Cuál es la motivación de utilizar datos de Twitter?<br/>Enlista las preguntas que se buscan responder con la exploración en Twitter</p> |

**Descripción y expectativas**





# Plantilla para documentación de búsquedas exploratorias

Utiliza esta plantilla para documentar tus observaciones de las búsquedas exploratorias.

Nombre del proyecto: \_\_\_\_\_

Fecha: \_\_\_\_\_

## Documentación de búsquedas exploratorias

| ID | Lugar | Temporalidad | Combinación de palabras clave | Número de resultados | Observaciones | Actores / Cuentas de Twitter | Ejemplos de tuits |
|----|-------|--------------|-------------------------------|----------------------|---------------|------------------------------|-------------------|
| 1  |       |              |                               |                      |               |                              |                   |
| 2  |       |              |                               |                      |               |                              |                   |
| 3  |       |              |                               |                      |               |                              |                   |
| 4  |       |              |                               |                      |               |                              |                   |
| 5  |       |              |                               |                      |               |                              |                   |
| 6  |       |              |                               |                      |               |                              |                   |
| 7  |       |              |                               |                      |               |                              |                   |
| 8  |       |              |                               |                      |               |                              |                   |
| 9  |       |              |                               |                      |               |                              |                   |
| 10 |       |              |                               |                      |               |                              |                   |
| 11 |       |              |                               |                      |               |                              |                   |
| 12 |       |              |                               |                      |               |                              |                   |

Descripción:

# Plantilla de documentación de hallazgos y observaciones

Utiliza esta plantilla para documentar los principales y hallazgos de la exploración inicial

Nombre del proyecto

Descripción

## Recapitulación

del enfoque de búsqueda  
Enlista las palabras buscadas,  
cuentas de Twitter, hashtags,  
periodos de tiempo en los que  
se enfocó la búsqueda

## Enlista observaciones interesantes

*Actores interesantes*

Si identificaste a nuevos actores o comunidades involucradas en la problemática examinada, enlístalas aquí:  
¿Quiénes son?  
¿Qué es interesante de ellxs?  
¿Cuál es su rol?

\*Agrega ejemplos de tuits para ilustrar las observaciones

## Hallazgos iniciales

Describe brevemente cómo se discute el tema de interés en Twitter

## Enlista observaciones interesantes

*Acciones o prácticas interesantes*

Si identificaste nuevas perspectivas o iniciativas interesantes que abonan a la problemática examinada, descríbelas y enlístalas aquí:  
¿Cuál es el propósito de esas iniciativas?  
¿Que las distingue de iniciativas existentes?

\*Agrega ejemplos de tuits para ilustrar las observaciones

# Plantilla para documentación de búsquedas exploratorias

Utiliza esta plantilla para documentar tus observaciones de las búsquedas exploratorias.

|                                                                                                     |                                                                                                                                                                                                                                              |                                                                                                                                                                                                                                                                                                                                                                                    |                                                                                                     |                                   |
|-----------------------------------------------------------------------------------------------------|----------------------------------------------------------------------------------------------------------------------------------------------------------------------------------------------------------------------------------------------|------------------------------------------------------------------------------------------------------------------------------------------------------------------------------------------------------------------------------------------------------------------------------------------------------------------------------------------------------------------------------------|-----------------------------------------------------------------------------------------------------|-----------------------------------|
| <p>Nombre del proyecto</p>                                                                          | <p><b>Relación entre hallazgos de Twitter y conocimientos previos</b></p> <p>¿Cómo se relacionan o diferencian las observaciones encontradas en Twitter con lo que sabías del problema anteriormente?<br/>¿Qué es nuevo? ¿Qué se repite?</p> | <p><b>Limitaciones</b></p> <p>¿Qué limitaciones anticipas? Por ejemplo no encontrar información específica de un lugar o de una población en específico<br/>¿Cuáles son algunas inquietudes o preocupaciones?</p>                                                                                                                                                                  |                                                                                                     |                                   |
| <p>Descripción</p>                                                                                  | <p>*Agrega ejemplos de tuits para ilustrar las observaciones</p>                                                                                                                                                                             | <p><b>¿Sería interesante realizar una búsqueda más profunda?</b></p> <table><tr><td data-bbox="2013 1427 2520 1614"><p><b>Si</b></p><p>¿Cómo contribuyen los datos de Twitter a entender el problema a investigar?</p></td><td data-bbox="2529 1427 2986 1614"><p><b>No</b></p><p>¿Por qué?</p></td></tr></table> <p>*Agrega ejemplos de tuits para ilustrar las observaciones</p> | <p><b>Si</b></p> <p>¿Cómo contribuyen los datos de Twitter a entender el problema a investigar?</p> | <p><b>No</b></p> <p>¿Por qué?</p> |
| <p><b>Si</b></p> <p>¿Cómo contribuyen los datos de Twitter a entender el problema a investigar?</p> | <p><b>No</b></p> <p>¿Por qué?</p>                                                                                                                                                                                                            |                                                                                                                                                                                                                                                                                                                                                                                    |                                                                                                     |                                   |
